# Supplementary material for: Tunable photochemical 6π heterocyclization reactions mediated by a boron Lewis acid
Source: Royal Society of Chemistry journal article supplement (doi:10.1039/d1nj03218f), 2021-01-01
Supplement: d1nj03218f1.pdf [file d1nj03218f1.pdf]

Supporting Information (SI) for

# Tunable Photochemical $6\pi$ Heterocyclization Reaction Mediated by a Boron Lewis Acid

Lishuang Ma,<sup>\*a</sup> Wenxu Feng,<sup>a</sup> Hongyan Shang,<sup>ab</sup> Xufeng Lin,<sup>\*ab</sup> Yanyan Xi<sup>bc</sup>

<sup>a</sup> Department of Chemistry, College of Science, China University of Petroleum (East China), Qingdao, 266580, P. R. China

<sup>b</sup> State Key Laboratory of Heavy Oil Processing China University of Petroleum (East China), Qingdao, 266580, P. R. China

<sup>c</sup> State Key Laboratory of Heavy Oil Processing China University of Petroleum (East China), Qingdao, P. R. China, 266580

## Contents

|                                                                         |     |
|-------------------------------------------------------------------------|-----|
| 1. Selected Orbitals in Active Space.....                               | S2  |
| 2. Geometric Parameters of Critical Structures.....                     | S5  |
| 3. Charge Translocation Calculations.....                               | S9  |
| 4. Intersystem Crossing Rate Constant Calculations.....                 | S10 |
| 5. References.....                                                      | S10 |
| 6. MEPs for the Disrotatory $6\pi$ Photocyclization.....                | S11 |
| 7. MEPs for the Stepwise Pathway via Two Consecutive [1,2]-H Shift..... | S12 |
| 8. MEPs for the $6\pi$ cyclization pathways in in the ground state..... | S13 |
| 9. Tables for the Absolute and Relative Energies.....                   | S14 |
| 10. Cartesian Coordinates.....                                          | S49 |

## 1. Selected Orbitals in Active Space

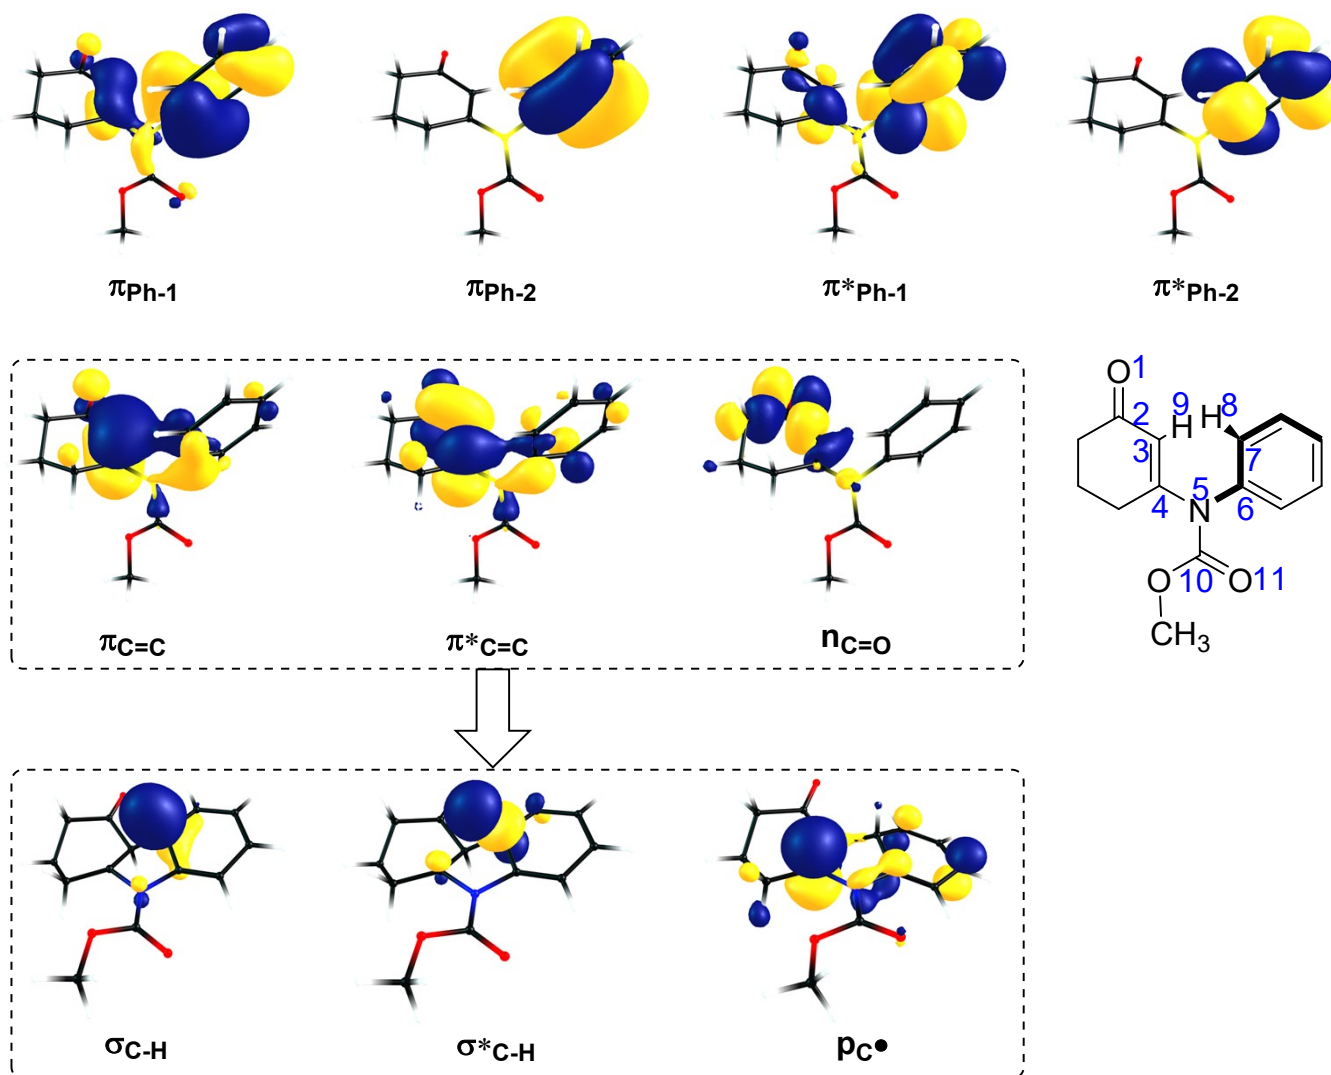

**Figure S1.** Molecular orbitals of the enaminone substrate **2** used in defining the active spaces for the CASPT2// CASSCF(8e/7o) calculations. The  $\pi/\pi^*$  orbitals of C3=C4 double bond and the n orbital of C2=O1 carbonyl group were included for the 6 $\pi$  photocyclization reaction, which subsequently were replaced by the  $\sigma/\sigma^*$  orbitals of C-H bond and the  $p$  orbital of the carbon atom for describing the 1,4-H shift process, as shown in the dashed boxes.

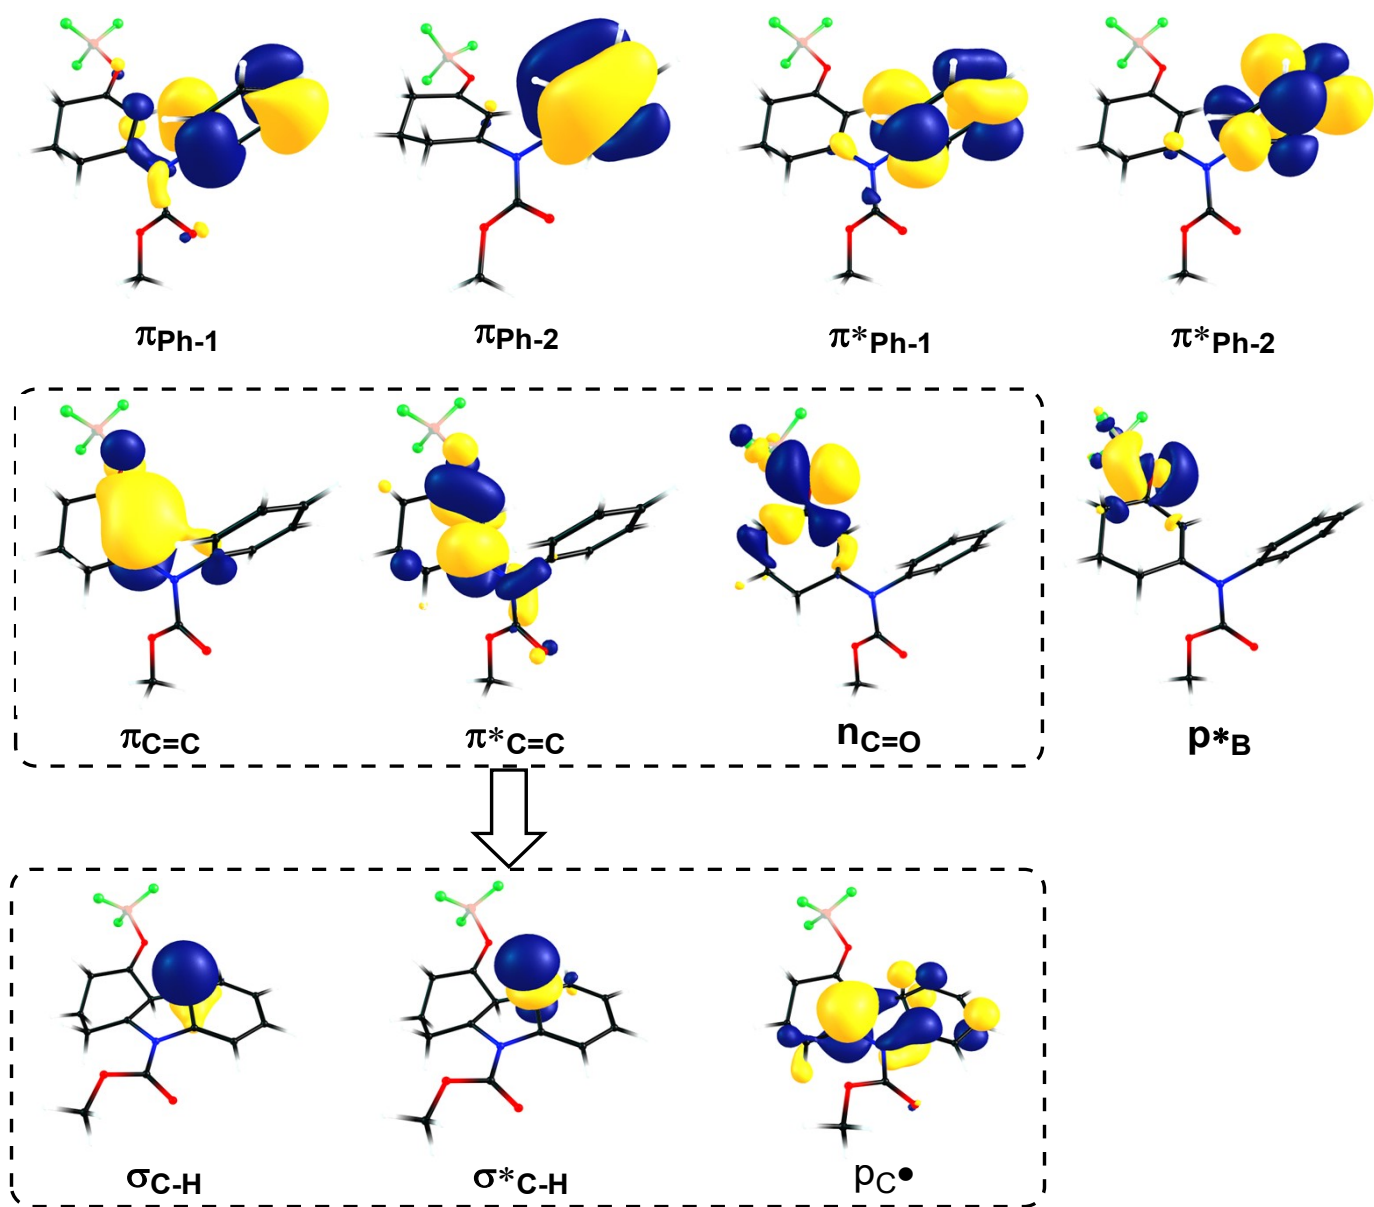

**Figure S2.** Molecular orbitals of 2- $\text{BF}_3$  complex used in defining the active space for the CASPT2//CASSCF(8e/8o) calculations. The  $\pi/\pi^*$  orbitals of C3=C4 double bond and the n orbital of C2=O1 carbonyl group were included for the  $6\pi$  photocyclization reaction, which subsequently were replaced by the  $\sigma/\sigma^*$  orbitals of C-H bond and the  $p$  orbital of the carbon atom for describing the 1,4-H shift process as shown in the dashed boxes.

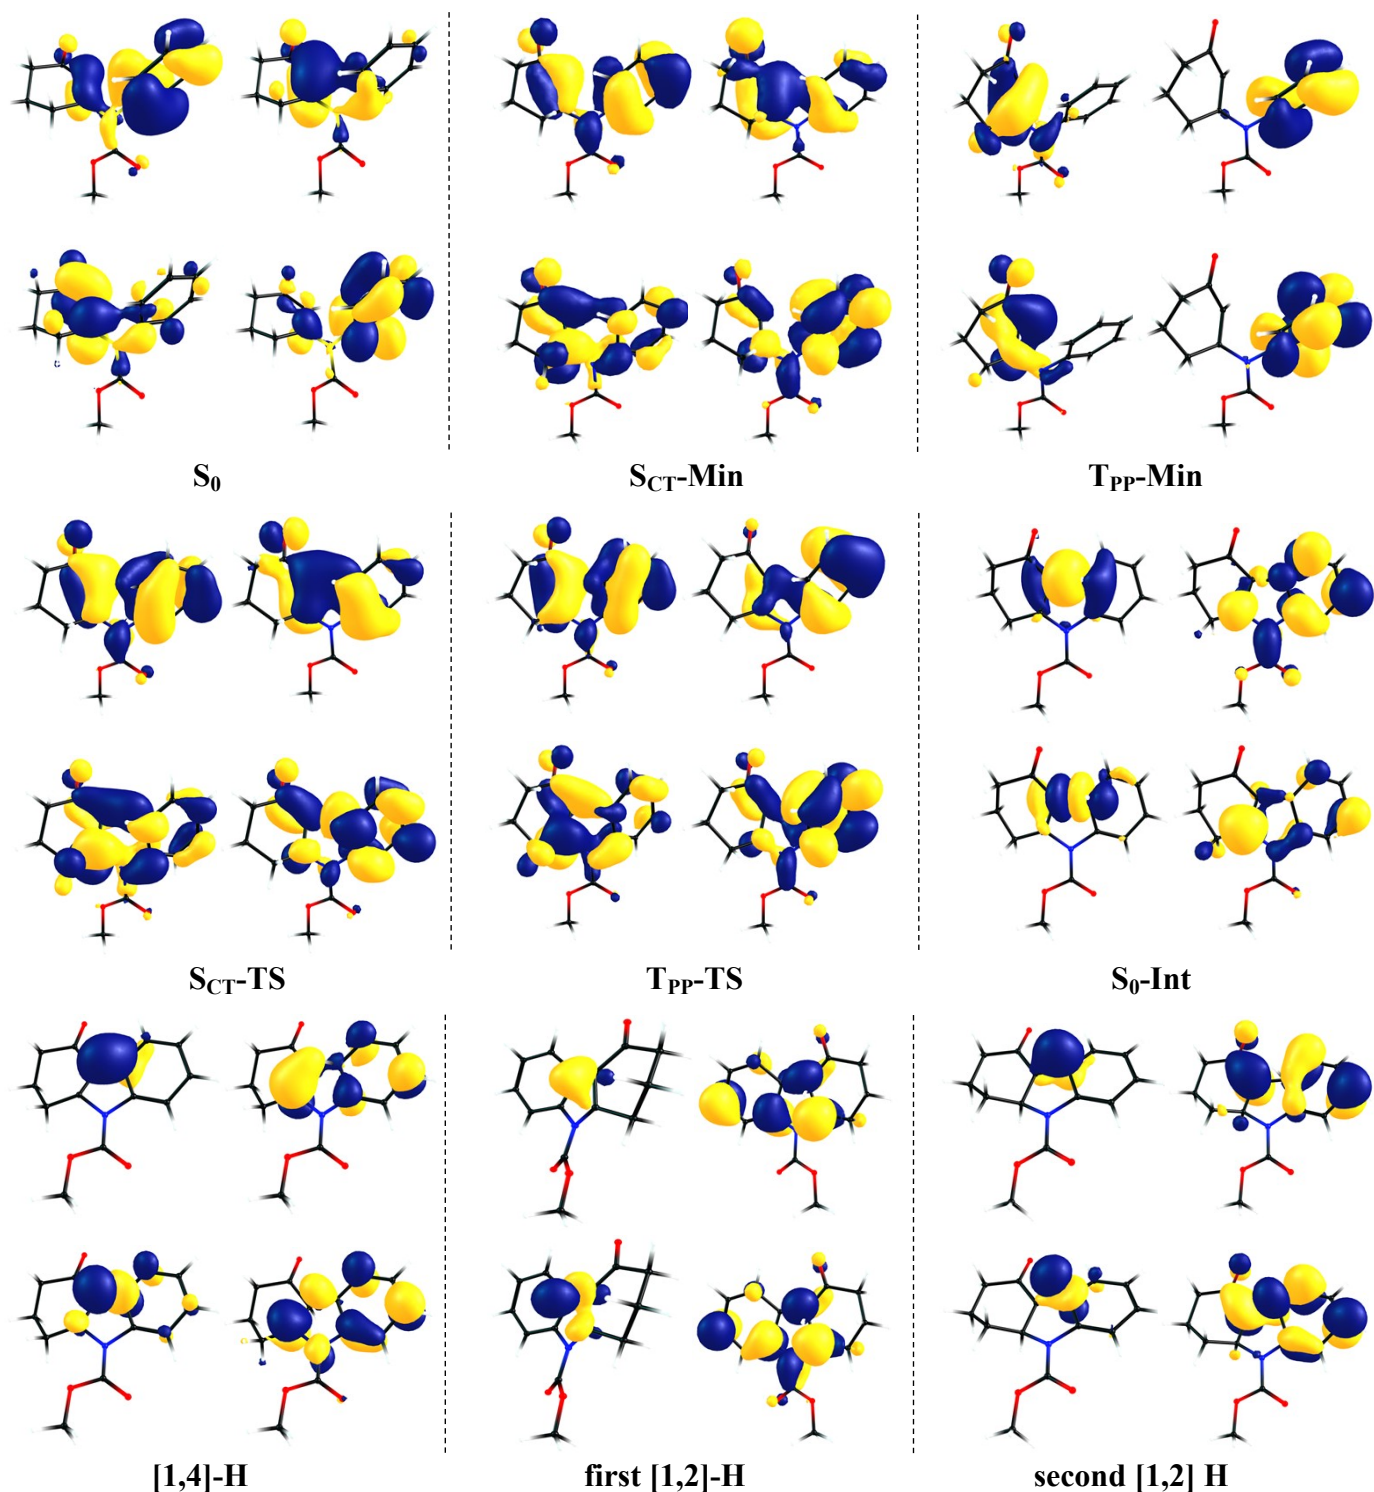

**Figure S3.** Schematic orbitals evolution in the active space of **2** is shown to account for the possible orbitals participating in the  $6\pi$  photocyclization reaction. Only the most relevant four orbitals are shown for clarity. As illustrated in the figure, one pair of  $\pi/\pi^*$  orbitals are gradually evolved to be the pair of  $\sigma/\sigma^*$  orbitals of C3-C7 bond along the photoinduced ring-closure process, which are further replaced by the  $\sigma/\sigma^*$  orbitals of different C-H bonds for the subsequent [1,4]-H shift process or the stepwise [1,2]-H shift processes.



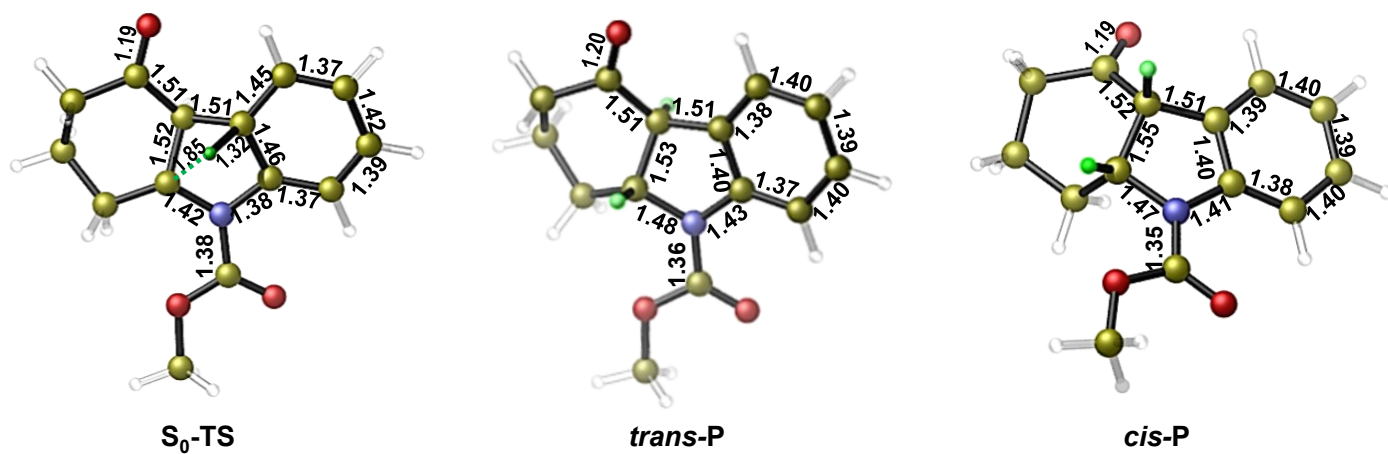

**Figure S4.** The critical structures for the free **2** along the  $6\pi$  photocyclization reaction pathways. Selected key bond lengths are given in Å. All the Hydrogen atoms are set to be transparent for clarity, except that involved in the [1,4]-H shift reaction are highlighted in green.

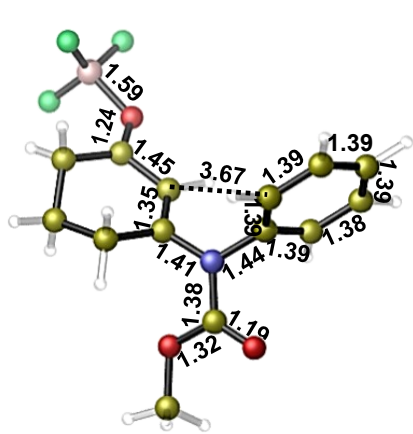

$S_0$ -Min

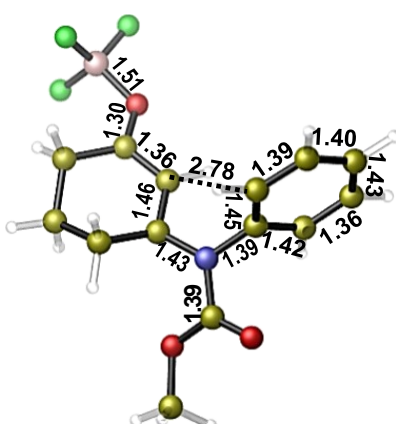

$S_{CT}$ -Min

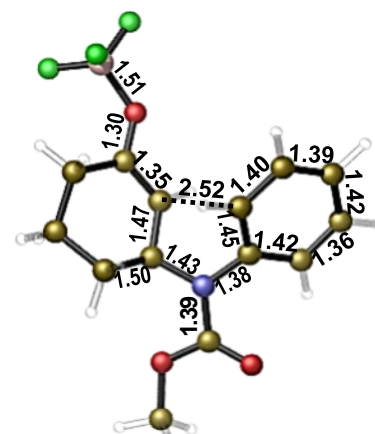

$S_{CT}$ -TS

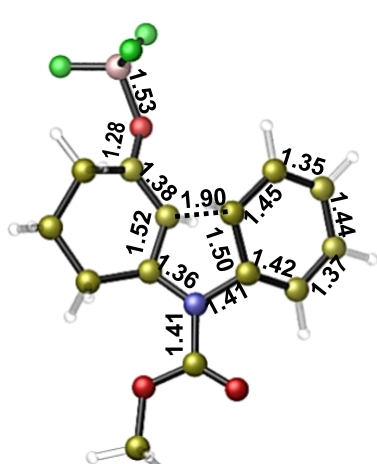

CI( $S_{CT}/S_0$ )

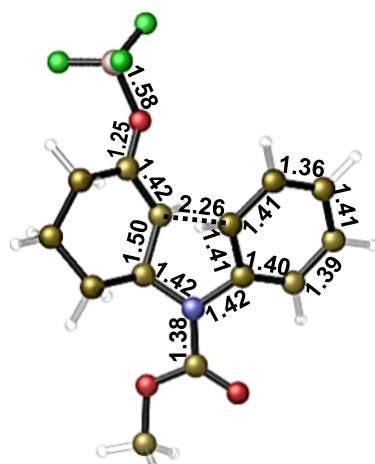

$T_{pp}$ -Min

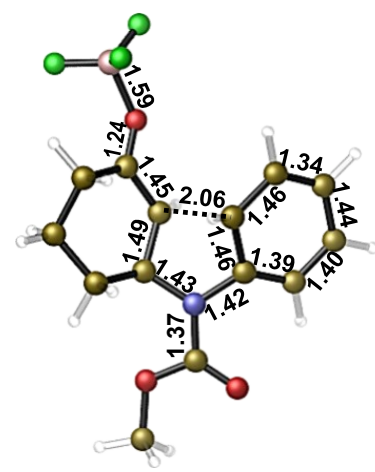

$T_{pp}$ -TS

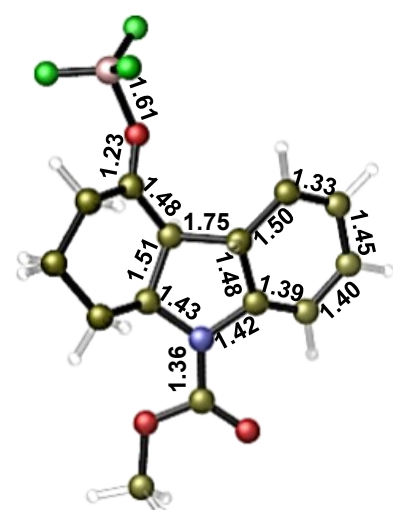

STC( $T_{pp}/S_0$ )

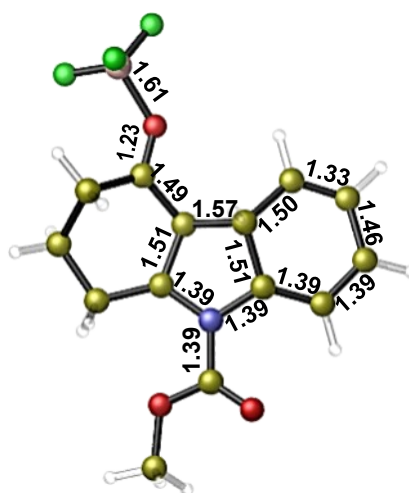

$S_0$ -Int

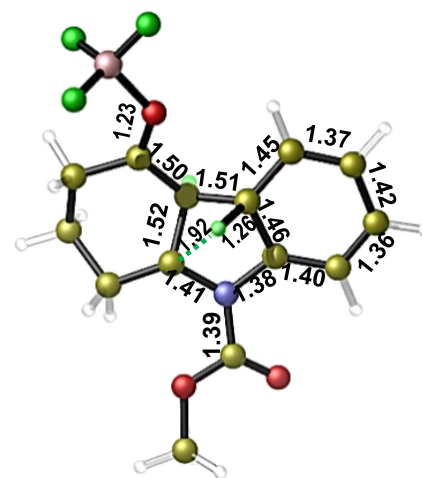

$S_0$ -TS

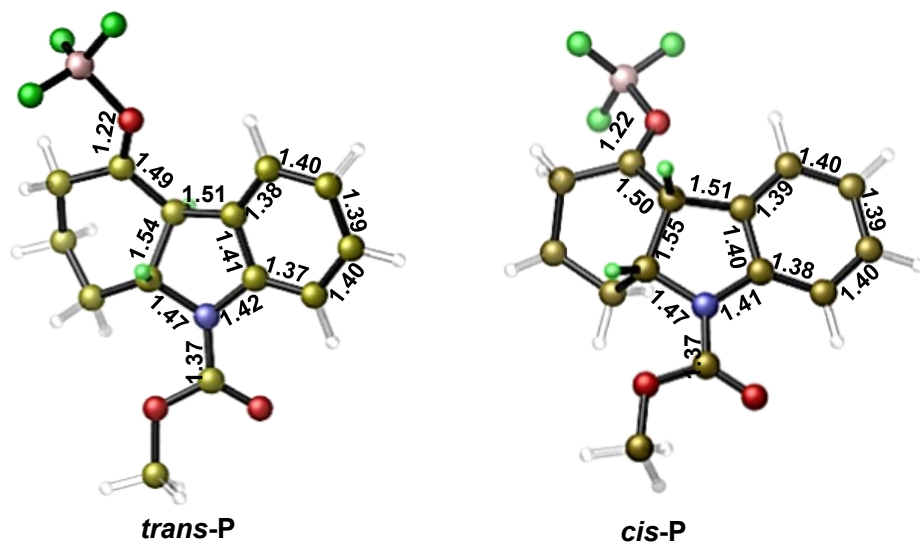

**Figure S5.** The critical structures for the **2-BF<sub>3</sub>** along the  $6\pi$  photocyclization reaction pathways. Selected key bond lengths are given in Å. All the Hydrogen atoms are set to be transparent for clarity, except that involved in the [1,4]-H shift process are highlighted in green.



### 3. Charge Translocation Calculations

To further explore the excited-state properties of different transitions for the enaminone **2** and the **2-BF<sub>3</sub>** complex, charge translocation calculations were performed based on the CASPT2 computations and an appropriate fragment partitioning strategy. As shown in Figure S6, the  $\beta$ -enaminone moiety, the phenyl group and the N-alkoxycarbonyl moiety are defined as part I, II and III, respectively, and the BF<sub>3</sub> Lewis acid is referred as part IV in **2-BF<sub>3</sub>** complex. Table S1 summarizes the Mulliken charge populations of the four parts in the S<sub>0</sub>, S<sub>CT</sub>(<sup>1</sup> $\pi\pi^*$ ) and S<sub>NP</sub>(<sup>1</sup> $n\pi^*$ ) states upon the photoexcitation of **2** and **2-BF<sub>3</sub>**.

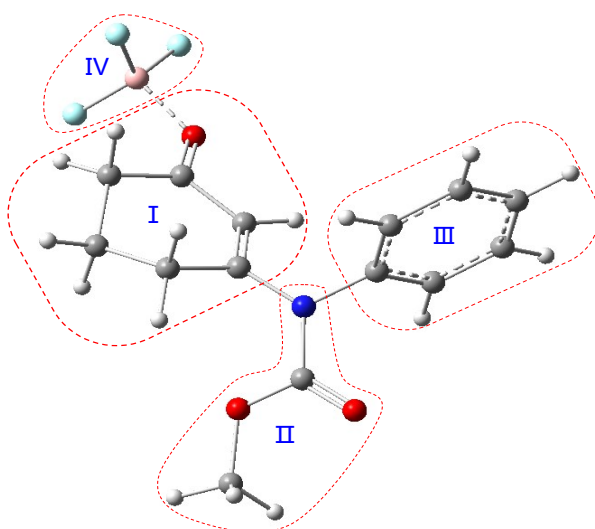

**Figure S6.** The scheme of fragment partition for **2** and **2-BF<sub>3</sub>**.

**Table S1.** Charge populations (*e*) of **2** and **2-BF<sub>3</sub>** in part I, II, III and IV in the S<sub>0</sub>, S<sub>CT</sub>(<sup>1</sup> $\pi\pi^*$ ) and S<sub>NP</sub>(<sup>1</sup> $n\pi^*$ ) states upon the photoexcitation.

| Complexes               | Part | S <sub>0</sub> | S <sub>CT</sub> | S <sub>NP</sub> |
|-------------------------|------|----------------|-----------------|-----------------|
| <b>2</b>                | I    | 0.310          | -0.052          | 0.310           |
|                         | II   | -0.642         | -0.586          | -0.641          |
|                         | III  | 0.333          | 0.637           | 0.330           |
| <b>2-BF<sub>3</sub></b> | I    | 0.548          | 0.150           | 0.414           |
|                         | II   | -0.615         | -0.586          | -0.616          |
|                         | III  | 0.340          | 0.722           | 0.398           |
|                         | IV   | -0.273         | -0.286          | -0.195          |

#### 4. Intersystem Crossing Rate Constant Calculations

The intersystem crossing (ISC) rates between singlet and triplet states in this work were estimated in the Condon approximation as<sup>S1,S2</sup>

$$k_{\text{ISC}} = \frac{2\pi}{\hbar} \cdot \left| \langle {}^1\psi_0 | \hat{H}_{\text{SO}} | {}^3\psi_0 \rangle \right|^2 \cdot \left| \langle \chi_0 | \chi_n \rangle \right|^2 \cdot \rho \quad (1)$$

where the electronic coupling between the singlet state  ${}^1\psi_0$  and the triplet state  ${}^3\psi_0$  can be calculated as the SOC, the Franck–Condon factor of  $\langle \chi_0 | \chi_n \rangle$  is taken equal to 1 at the STC point, and  $\rho = 1/\Delta E_{\text{S/T}}$  is the reciprocal of the energy difference between the singlet and triplet states.

**Table S2.** The computed spin–orbit coupling values (SOC,  $\text{cm}^{-1}$ ) and the singlet–triplet energy gaps ( $\Delta E_{\text{S/T}}$ , kcal/mol) of the involved singlet–triplet crossings (STCs) between  $\text{S}_{\text{NP}}$  and  $\text{T}_{\text{PP}}$  states or the minima of  $\text{S}_{\text{CT}}$  state. The rate of intersystem crossing ( $k_{\text{ISC}}$ ,  $\text{s}^{-1}$ ) is estimated in the Condon approximation.

| species                 | Critical points                                    | $\Delta E_{\text{S/T}}$ | SOC  | $k_{\text{ISC}}$     |
|-------------------------|----------------------------------------------------|-------------------------|------|----------------------|
| <b>2</b>                | STC( $\text{S}_{\text{NP}}/\text{T}_{\text{PP}}$ ) | 0.6                     | 36.5 | $7.5 \times 10^{12}$ |
| <b>2-BF<sub>3</sub></b> | $\text{S}_{\text{CT}}$ .Min                        | 7.2                     | 0.29 | $3.9 \times 10^7$    |

#### 5. References

(S1) Marian, C. M. *WIREs Comput. Mol. Sci.* **2002**, 2, 187–203.

(S2) Emelina, T. B.; Freidzon, A. Y.; Bagaturyants, A. A.; Karasev, V. E. *J. Phys. Chem. A* **2016**, 120, 7529–7537.



## 7. MEPs for the Stepwise Pathway via Two Consecutive [1,2]-H Shift

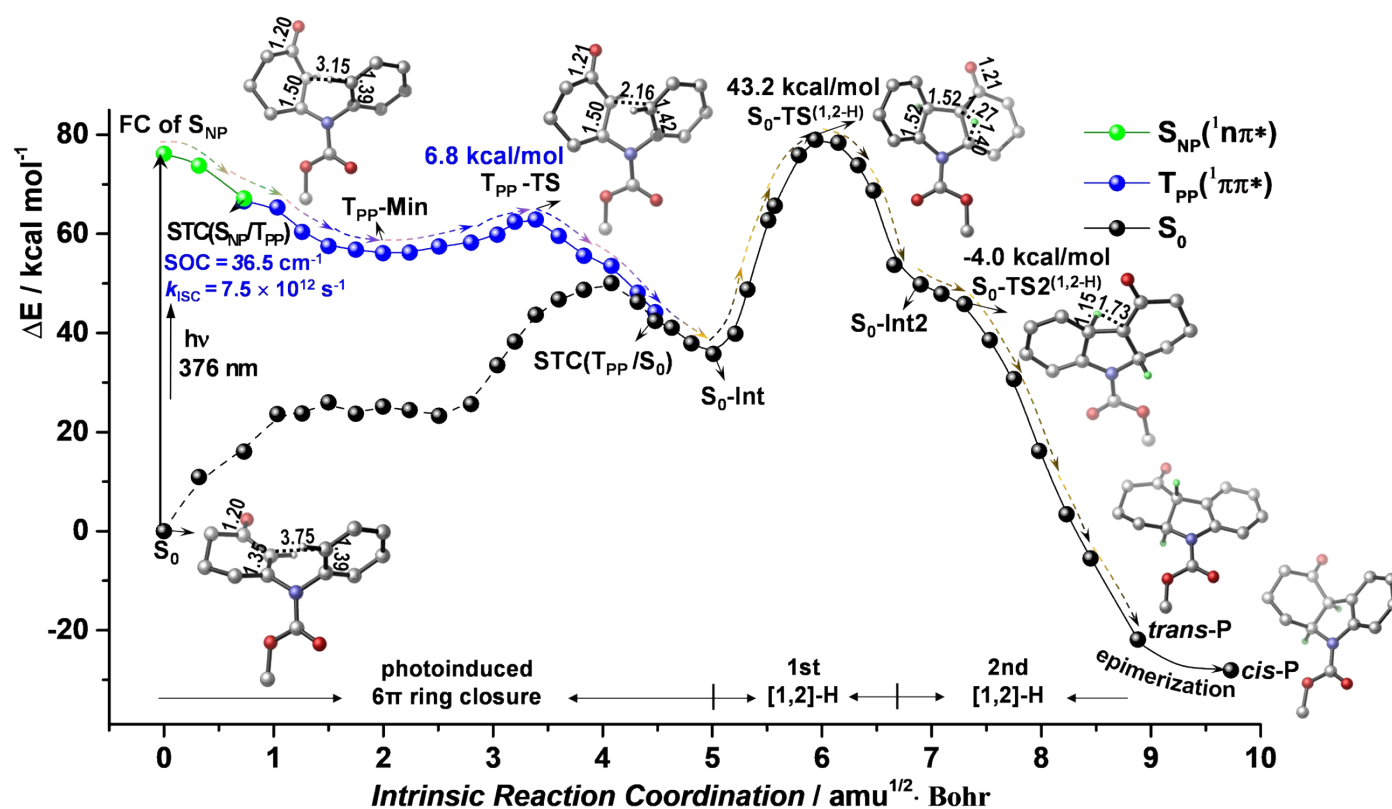

**Figure S8.** MEPs of the  $6\pi$  photocyclization reaction for free **2** in triplet state followed by two consecutive [1,2]-H shift reactions at the CASPT2//CASSCF(8e/7o)/PCM level of theory.

## 8. MEPs for the $6\pi$ cyclization pathways in the ground state

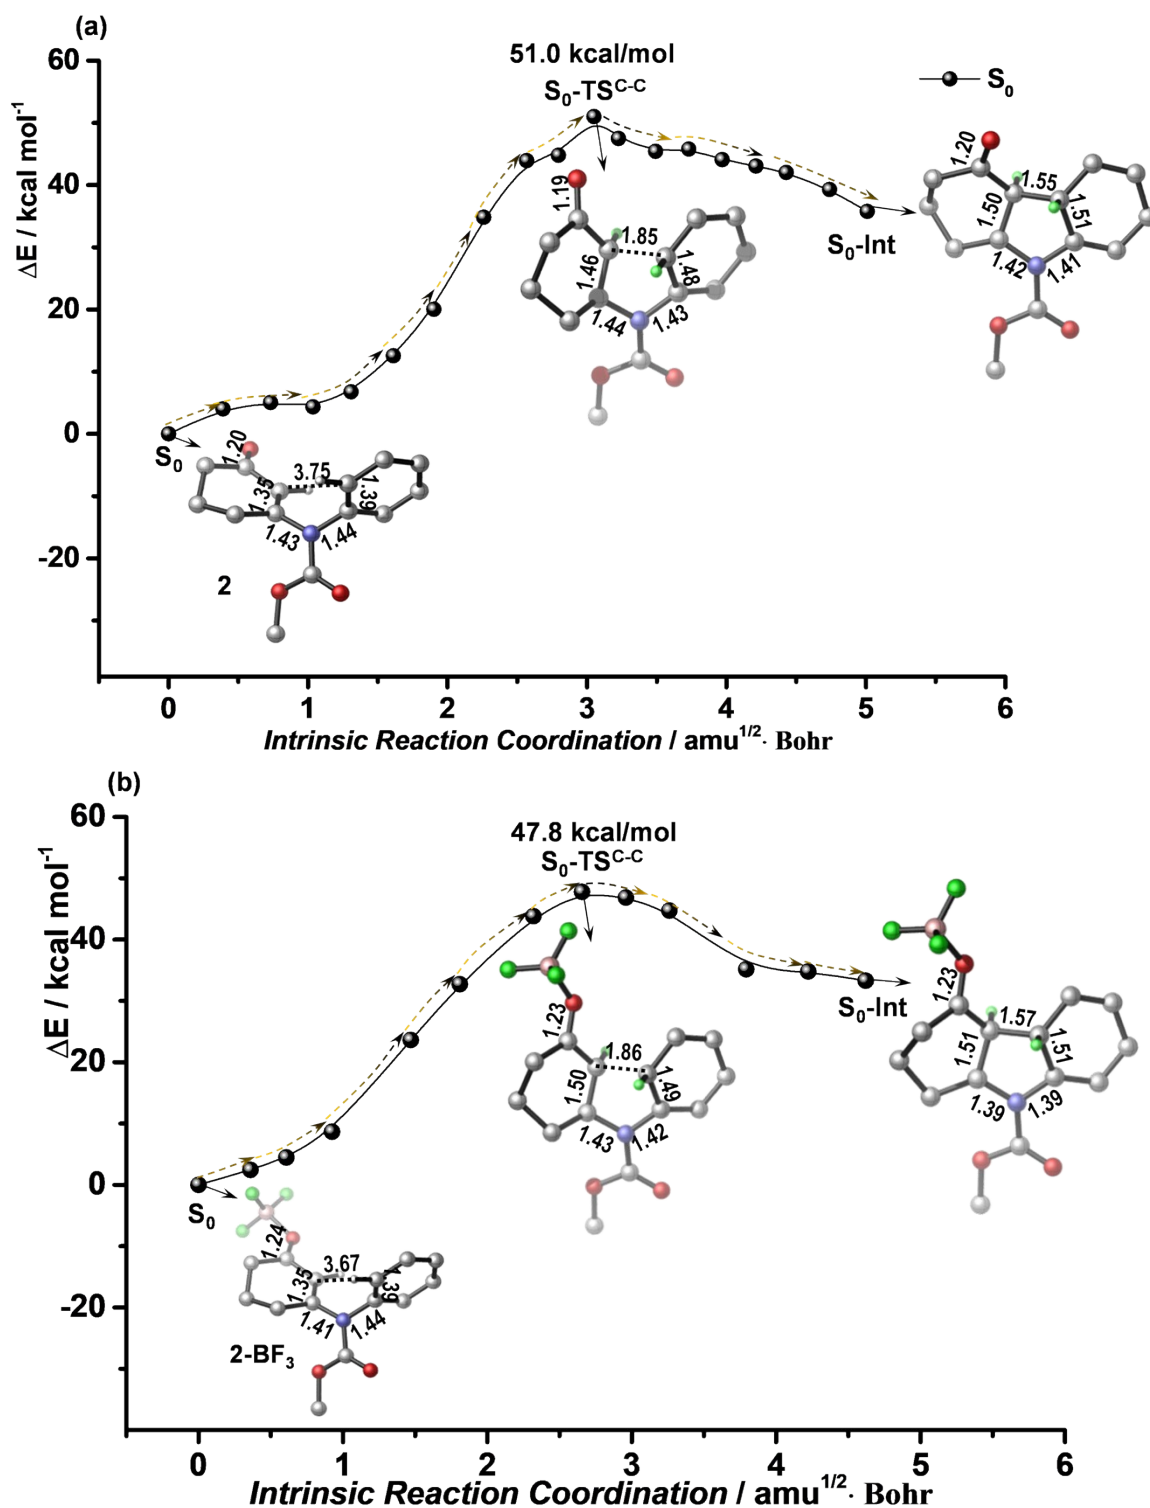

**Figure S9.** MEPs of the  $6\pi$  cyclization reaction pathways for free **2** (a) and **2-BF<sub>3</sub>** complex (b) in the singlet  $S_0$  ground state at the CASPT2//CASSCF/PCM level of theory.

## 9. Tables for the Absolute and Relative Energies

**Table S3.** Absolute energies (A.E., Hartree), relative energies (R.E., kcal/mol) for the optimized structures of free enaminone **2** along the  $6\pi$  photocyclization reaction pathway in the singlet excited state and subsequent [1,4]-H shift in ground state obtained by CASPT2//CASSCF(8e/7o)/PCM/6-31G\*\* calculations. The corresponding energy profiles are plotted in Figure 1a of the main article.

| <b>2</b>                     |                                            | <b>CASSCF</b> | <b>RASSCF</b> | <b>CASPT2</b> |             |
|------------------------------|--------------------------------------------|---------------|---------------|---------------|-------------|
|                              |                                            | <b>A.E.</b>   | <b>A.E.</b>   | <b>A.E.</b>   | <b>R.E.</b> |
| <b>S<sub>0</sub>-Min</b>     | Root1(S <sub>0</sub> )                     | -818.05468    | -818.02669    | -820.51544    | 0.0         |
|                              | Root2[S <sub>NP</sub> ( <sup>1</sup> nπ*)] |               | -817.83347    | -820.39409    | 76.1        |
|                              | Root3                                      |               | -817.79469    |               |             |
|                              | Root4[S <sub>CT</sub> ( <sup>1</sup> ππ*)] |               | -817.75482    | -820.35083    | 103.3       |
|                              | Root5                                      |               | -817.72963    |               |             |
|                              | Root1[T <sub>PP</sub> ( <sup>3</sup> ππ*)] |               | -817.89165    | -820.39841    | 73.4        |
|                              | Root2                                      |               | -817.86938    |               |             |
|                              | Root3                                      |               | -817.82737    |               |             |
|                              | Root4                                      |               | -817.82276    |               |             |
|                              | Root5                                      |               | -817.82189    |               |             |
| <b>Path S<sub>CT</sub>-1</b> | Root1(S <sub>0</sub> )                     |               | -818.01331    | -820.51528    | 0.1         |
|                              | Root2                                      |               | -817.83690    |               |             |
|                              | Root3                                      |               | -817.79100    |               |             |
|                              | Root4[S <sub>CT</sub> ( <sup>1</sup> ππ*)] | -817.83616    | -817.77659    | -820.35173    | 102.7       |
|                              | Root5                                      |               | -817.74380    |               |             |
| <b>Path S<sub>CT</sub>-2</b> | Root1                                      |               | -818.00799    | -820.51154    | 2.4         |
|                              | Root2                                      |               | -817.83365    |               |             |
|                              | Root3                                      |               | -817.78724    |               |             |
|                              | Root4[S <sub>CT</sub> ( <sup>1</sup> ππ*)] | -817.84137    | -817.77942    | -820.35586    | 100.1       |
|                              | Root5                                      |               | -817.74185    |               |             |
| <b>Path S<sub>CT</sub>-3</b> | Root1(S <sub>0</sub> )                     |               | -818.00721    | -820.51145    | 2.5         |
|                              | Root2                                      |               | -817.83408    |               |             |
|                              | Root3                                      |               | -817.78685    |               |             |
|                              | Root4[S <sub>CT</sub> ( <sup>1</sup> ππ*)] | -817.85094    | -817.78089    | -820.35884    | 98.3        |
|                              | Root5                                      |               | -817.74206    |               |             |
| <b>Path S<sub>CT</sub>-4</b> | Root1(S <sub>0</sub> )                     |               | -818.00694    | -820.51230    | 2.0         |
|                              | Root2                                      |               | -817.83511    |               |             |
|                              | Root3                                      |               | -817.78708    |               |             |
|                              | Root4[S <sub>CT</sub> ( <sup>1</sup> ππ*)] | -817.84715    | -817.78016    | -820.36076    | 97.1        |
|                              | Root5                                      |               | -817.74144    |               |             |

|                               |                                            |            |            |            |      |
|-------------------------------|--------------------------------------------|------------|------------|------------|------|
| <b>Path S<sub>CT</sub>-5</b>  | Root1(S <sub>0</sub> )                     |            | -818.00642 | -820.51302 | 1.5  |
|                               | Root2                                      |            | -817.83610 |            |      |
|                               | Root3                                      |            | -817.78606 |            |      |
|                               | Root4[S <sub>CT</sub> ( <sup>1</sup> ππ*)] | -817.85205 | -817.78141 | -820.36508 | 94.4 |
|                               | Root5                                      |            | -817.74020 |            |      |
| <b>Path S<sub>CT</sub>-6</b>  | Root1(S <sub>0</sub> )                     |            | -817.98874 | -820.49808 | 10.9 |
|                               | Root2                                      |            | -817.82698 |            |      |
|                               | Root3[S <sub>CT</sub> ( <sup>1</sup> ππ*)] | -817.85259 | -817.78615 | -820.37179 | 90.1 |
|                               | Root4                                      |            | -817.77580 |            |      |
|                               | Root5                                      |            | -817.76071 |            |      |
| <b>Path S<sub>CT</sub>-7</b>  | Root1(S <sub>0</sub> )                     |            | -817.98755 | -820.49851 | 10.6 |
|                               | Root2                                      |            | -817.82659 |            |      |
|                               | Root3[S <sub>CT</sub> ( <sup>1</sup> ππ*)] | -817.85473 | -817.78698 | -820.37648 | 87.2 |
|                               | Root4                                      |            | -817.77479 |            |      |
|                               | Root5                                      |            | -817.76208 |            |      |
| <b>Path S<sub>CT</sub>-8</b>  | Root1(S <sub>0</sub> )                     |            | -817.98418 | -820.49646 | 11.9 |
|                               | Root2                                      |            | -817.82427 |            |      |
|                               | Root3[S <sub>CT</sub> ( <sup>1</sup> ππ*)] | -817.85483 | -817.78564 | -820.37807 | 86.2 |
|                               | Root4                                      |            | -817.77213 |            |      |
|                               | Root5                                      |            | -817.76401 |            |      |
| <b>Path S<sub>CT</sub>-9</b>  | Root1(S <sub>0</sub> )                     |            | -817.98026 | -820.49293 | 14.1 |
|                               | Root2                                      |            | -817.82047 |            |      |
|                               | Root3[S <sub>CT</sub> ( <sup>1</sup> ππ*)] | -817.84318 | -817.79112 | -820.37593 | 87.5 |
|                               | Root4                                      |            | -817.77356 |            |      |
|                               | Root5                                      |            | -817.76702 |            |      |
| <b>Path S<sub>CT</sub>-10</b> | Root1(S <sub>0</sub> )                     |            | -817.97071 | -820.48248 | 20.7 |
|                               | Root2                                      |            | -817.80809 |            |      |
|                               | Root3[S <sub>CT</sub> ( <sup>1</sup> ππ*)] | -817.82950 | -817.79727 | -820.37225 | 89.9 |
|                               | Root4                                      |            | -817.77116 |            |      |
|                               | Root5                                      |            | -817.76628 |            |      |
| <b>Path S<sub>CT</sub>-11</b> | Root1(S <sub>0</sub> )                     |            | -817.96031 | -820.47179 | 27.4 |
|                               | Root2[S <sub>CT</sub> ( <sup>1</sup> ππ*)] | -817.82747 | -817.80660 | -820.36593 | 93.8 |
|                               | Root3                                      |            | -817.78934 |            |      |
|                               | Root4                                      |            | -817.77090 |            |      |
|                               | Root5                                      |            | -817.76368 |            |      |
| <b>Path S<sub>CT</sub>-12</b> | Root1(S <sub>0</sub> )                     |            | -817.95215 | -820.46397 | 32.3 |
|                               | Root2[S <sub>CT</sub> ( <sup>1</sup> ππ*)] | -817.82697 | -817.80952 | -820.35950 | 97.9 |
|                               | Root3                                      |            | -817.77825 |            |      |

|                               |                                            |            |            |            |       |
|-------------------------------|--------------------------------------------|------------|------------|------------|-------|
|                               | Root4                                      |            | -817.77000 |            |       |
|                               | Root5                                      |            | -817.76060 |            |       |
|                               |                                            |            |            |            |       |
| <b>Path S<sub>CT</sub>-13</b> | Root1(S <sub>0</sub> )                     |            | -817.94333 | -820.45618 | 37.2  |
|                               | Root2[S <sub>CT</sub> ( <sup>1</sup> ππ*)] | -817.82735 | -817.81225 | -820.35591 | 100.1 |
|                               | Root3                                      |            | -817.77030 |            |       |
|                               | Root4                                      |            | -817.76615 |            |       |
|                               | Root5                                      |            | -817.75641 |            |       |
|                               |                                            |            |            |            |       |
| <b>Path S<sub>CT</sub>-14</b> | Root1(S <sub>0</sub> )                     |            | -817.94524 | -820.44829 | 42.1  |
|                               | Root2[S <sub>CT</sub> ( <sup>1</sup> ππ*)] | -817.82823 | -817.82682 | -820.36199 | 96.3  |
|                               | Root3                                      |            | -817.78704 |            |       |
|                               | Root4                                      |            | -817.77218 |            |       |
|                               | Root5                                      |            | -817.72152 |            |       |
|                               |                                            |            |            |            |       |
| <b>Path S<sub>CT</sub>-15</b> | Root1(S <sub>0</sub> )                     |            | -817.93210 | -820.43745 | 48.9  |
|                               | Root2[S <sub>CT</sub> ( <sup>1</sup> ππ*)] | -817.83273 | -817.83095 | -820.36549 | 94.1  |
|                               | Root3                                      |            | -817.78422 |            |       |
|                               | Root4                                      |            | -817.77057 |            |       |
|                               | Root5                                      |            | -817.71246 |            |       |
|                               |                                            |            |            |            |       |
| <b>Path S<sub>CT</sub>-16</b> | Root1(S <sub>0</sub> )                     |            | -817.92373 | -820.43216 | 52.3  |
|                               | Root2[S <sub>CT</sub> ( <sup>1</sup> ππ*)] | -817.83903 | -817.83675 | -820.37343 | 89.1  |
|                               | Root3                                      |            | -817.78210 |            |       |
|                               | Root4                                      |            | -817.77109 |            |       |
|                               | Root5                                      |            | -817.70613 |            |       |
|                               |                                            |            |            |            |       |
| <b>Path S<sub>CT</sub>-17</b> | Root1(S <sub>0</sub> )                     |            | -817.92052 | -820.43037 | 53.4  |
|                               | Root2[S <sub>CT</sub> ( <sup>1</sup> ππ*)] | -817.84249 | -817.84009 | -820.37768 | 86.4  |
|                               | Root3                                      |            | -817.78262 |            |       |
|                               | Root4                                      |            | -817.77130 |            |       |
|                               | Root5                                      |            | -817.70482 |            |       |
|                               |                                            |            |            |            |       |
| <b>Path S<sub>CT</sub>-18</b> | Root1(S <sub>0</sub> )                     |            | -817.91073 | -820.42546 | 56.5  |
|                               | Root2[S <sub>CT</sub> ( <sup>1</sup> ππ*)] | -817.84381 | -817.84237 | -820.38592 | 81.3  |
|                               | Root3                                      |            | -817.77773 |            |       |
|                               | Root4                                      |            | -817.77061 |            |       |
|                               | Root5                                      |            | -817.69694 |            |       |
|                               |                                            |            |            |            |       |
| <b>Path S<sub>CT</sub>-19</b> | Root1(S <sub>0</sub> )                     |            | -817.87868 | -820.41739 | 61.5  |
|                               | Root2[S <sub>CT</sub> ( <sup>1</sup> ππ*)] | -817.85395 | -817.82698 | -820.39477 | 75.7  |
|                               | Root3                                      |            | -817.76070 |            |       |
|                               | Root4                                      |            | -817.73365 |            |       |
|                               | Root5                                      |            | -817.67649 |            |       |
|                               |                                            |            |            |            |       |
| <b>Path S<sub>CT</sub>-20</b> | Root1(S <sub>0</sub> )                     |            | -817.89622 | -820.41696 | 61.8  |



|                                                                |                                                    |            |            |            |      |
|----------------------------------------------------------------|----------------------------------------------------|------------|------------|------------|------|
|                                                                | Root2[S <sub>CT</sub> ( <sup>1</sup> $\pi\pi^*$ )] | -817.85351 | -817.85345 | -820.40376 | 70.1 |
|                                                                | Root3                                              |            | -817.77696 |            |      |
|                                                                | Root4                                              |            | -817.75609 |            |      |
|                                                                | Root5                                              |            | -817.69476 |            |      |
|                                                                |                                                    |            |            |            |      |
| <b>CI(S<sub>CT</sub>/S<sub>0</sub>)</b>                        | Root1(S <sub>0</sub> )                             |            | -817.85948 | -820.40682 | 68.2 |
|                                                                | Root2[S <sub>CT</sub> ( <sup>1</sup> $\pi\pi^*$ )] | -817.85969 | -817.82467 | -820.40455 | 69.6 |
|                                                                | Root3                                              |            | -817.75115 |            |      |
|                                                                | Root4                                              |            | -817.69552 |            |      |
|                                                                | Root5                                              |            | -817.66156 |            |      |
|                                                                |                                                    |            |            |            |      |
| <b>Path S<sub>0</sub><sup>*</sup>-1</b>                        | Root1(S <sub>0</sub> )                             | -817.89176 | -817.88561 | -820.41657 | 62.0 |
|                                                                | Root2                                              |            | -817.84754 |            |      |
|                                                                | Root3                                              |            | -817.77286 |            |      |
|                                                                | Root4                                              |            | -817.69418 |            |      |
|                                                                | Root5                                              |            | -817.66735 |            |      |
|                                                                |                                                    |            |            |            |      |
| <b>Path S<sub>0</sub><sup>*</sup>-2</b>                        | Root1(S <sub>0</sub> )                             | -817.91630 | -817.90613 | -820.42979 | 53.7 |
|                                                                | Root2                                              |            | -817.82654 |            |      |
|                                                                | Root3                                              |            | -817.79080 |            |      |
|                                                                | Root4                                              |            | -817.70272 |            |      |
|                                                                | Root5                                              |            | -817.67229 |            |      |
|                                                                |                                                    |            |            |            |      |
| <b>Path S<sub>0</sub><sup>*</sup>-3</b>                        | Root1(S <sub>0</sub> )                             | -817.92964 | -817.91978 | -820.44136 | 46.5 |
|                                                                | Root2                                              |            | -817.82425 |            |      |
|                                                                | Root3                                              |            | -817.78576 |            |      |
|                                                                | Root4                                              |            | -817.72222 |            |      |
|                                                                | Root5                                              |            | -817.68165 |            |      |
|                                                                |                                                    |            |            |            |      |
| <b>Path S<sub>0</sub><sup>*</sup>-4</b>                        | Root1(S <sub>0</sub> )                             | -817.94296 | -817.93266 | -820.45526 | 37.8 |
|                                                                | Root2                                              |            | -817.82728 |            |      |
|                                                                | Root3                                              |            | -817.77714 |            |      |
|                                                                | Root4                                              |            | -817.74307 |            |      |
|                                                                | Root5                                              |            | -817.69720 |            |      |
|                                                                |                                                    |            |            |            |      |
| <b>Path S<sub>0</sub><sup>*</sup>-5/<br/>S<sub>0</sub>-Int</b> | Root1(S <sub>0</sub> )                             | -817.94828 | -817.93773 | -820.45846 | 35.8 |
|                                                                | Root2                                              |            | -817.82684 |            |      |
|                                                                | Root3                                              |            | -817.76558 |            |      |
|                                                                | Root4                                              |            | -817.74886 |            |      |
|                                                                | Root5                                              |            | -817.70261 |            |      |
|                                                                |                                                    |            |            |            |      |
| <b>Path S<sub>0</sub><sup>*</sup>-6</b>                        | Root1(S <sub>0</sub> )                             | -817.92909 | -817.92932 | -820.45303 | 39.2 |
|                                                                | Root2                                              |            | -817.81440 |            |      |
|                                                                | Root3                                              |            | -817.74794 |            |      |
|                                                                | Root4                                              |            | -817.74011 |            |      |
|                                                                | Root5                                              |            | -817.69320 |            |      |

|                                   |                |            |            |            |      |
|-----------------------------------|----------------|------------|------------|------------|------|
| <b>Path <math>S_0^*</math>-7</b>  | Root1( $S_0$ ) | -817.92224 | -817.92190 | -820.44715 | 42.9 |
|                                   | Root2          |            | -817.80353 |            |      |
|                                   | Root3          |            | -817.73695 |            |      |
|                                   | Root4          |            | -817.73265 |            |      |
|                                   | Root5          |            | -817.68415 |            |      |
| <b>Path <math>S_0^*</math>-8</b>  | Root1( $S_0$ ) | -817.90888 | -817.91706 | -820.44430 | 44.6 |
|                                   | Root2          |            | -817.78847 |            |      |
|                                   | Root3          |            | -817.73797 |            |      |
|                                   | Root4          |            | -817.72012 |            |      |
|                                   | Root5          |            | -817.67846 |            |      |
| <b>Path <math>S_0^*</math>-9</b>  | Root1( $S_0$ ) | -817.90884 | -817.91769 | -820.44348 | 45.2 |
|                                   | Root2          |            | -817.77963 |            |      |
|                                   | Root3          |            | -817.74340 |            |      |
|                                   | Root4          |            | -817.71139 |            |      |
|                                   | Root5          |            | -817.67549 |            |      |
| <b>Path <math>S_0^*</math>-10</b> | Root1( $S_0$ ) | -817.90739 | -817.92603 | -820.44895 | 41.7 |
|                                   | Root2          |            | -817.76968 |            |      |
|                                   | Root3          |            | -817.75160 |            |      |
|                                   | Root4          |            | -817.70444 |            |      |
|                                   | Root5          |            | -817.67351 |            |      |
| <b>Path <math>S_0^*</math>-11</b> | Root1( $S_0$ ) | -817.93214 | -817.92942 | -820.45220 | 39.7 |
|                                   | Root2          |            | -817.77451 |            |      |
|                                   | Root3          |            | -817.75739 |            |      |
|                                   | Root4          |            | -817.70913 |            |      |
|                                   | Root5          |            | -817.67882 |            |      |
| <b>Path <math>S_0^*</math>-12</b> | Root1( $S_0$ ) | -817.95928 | -817.96791 | -820.47445 | 25.7 |
|                                   | Root2          |            | -817.75968 |            |      |
|                                   | Root3          |            | -817.69893 |            |      |
|                                   | Root4          |            | -817.66017 |            |      |
|                                   | Root5          |            | -817.64412 |            |      |
| <b>Path <math>S_0^*</math>-13</b> | Root1( $S_0$ ) | -817.98707 | -817.99262 | -820.49609 | 12.1 |
|                                   | Root2          |            | -817.78151 |            |      |
|                                   | Root3          |            | -817.72091 |            |      |
|                                   | Root4          |            | -817.68047 |            |      |
|                                   | Root5          |            | -817.66393 |            |      |
| <b>Path <math>S_0^*</math>-14</b> | Root1( $S_0$ ) | -818.01017 | -818.01412 | -820.51616 | -0.5 |
|                                   | Root2          |            | -817.80219 |            |      |
|                                   | Root3          |            | -817.74233 |            |      |
|                                   | Root4          |            | -817.70110 |            |      |

|                |                        |            |            |            |       |
|----------------|------------------------|------------|------------|------------|-------|
|                | Root5                  |            | -817.68390 |            |       |
| <b>trans-P</b> | Root1(S <sub>0</sub> ) | -818.04608 | -818.05362 | -820.55105 | -22.3 |
|                | Root2                  |            | -817.84200 |            |       |
|                | Root3                  |            | -817.78109 |            |       |
|                | Root4                  |            | -817.74345 |            |       |
|                | Root5                  |            | -817.72135 |            |       |
| <b>cis-P</b>   | Root1(S <sub>0</sub> ) | -818.05619 | -818.06370 | -820.56019 | -28.1 |
|                | Root2                  |            | -817.85358 |            |       |
|                | Root3                  |            | -817.79208 |            |       |
|                | Root4                  |            | -817.75694 |            |       |
|                | Root5                  |            | -817.73287 |            |       |

**Table S4.** Absolute energies (A.E., Hartree), relative energies (R.E., kcal/mol) for the optimized structures of free enaminone **2** along reaction pathway of the <sup>1</sup>nπ\* decay, and the 6π photocyclization reaction pathway in the triplet excited state, as well as the subsequent [1,4]-H shift in ground state obtained by CASPT2//CASSCF(8e/7o)/PCM/6-31G\*\* calculations. The corresponding energy profiles are plotted in Figure 1b of the main article.

| <b>2</b>                      |                                            | <b>CASSCF</b> | <b>RASSCF</b> | <b>CASPT2</b> |             |
|-------------------------------|--------------------------------------------|---------------|---------------|---------------|-------------|
|                               |                                            | <b>A.E.</b>   | <b>A.E.</b>   | <b>A.E.</b>   | <b>R.E.</b> |
| <b>S<sub>0</sub>-Min</b>      | Root1(S <sub>0</sub> )                     | -818.05468    | -818.02669    | -820.51544    | 0.0         |
|                               | Root2[S <sub>NP</sub> ( <sup>1</sup> nπ*)] |               | -817.83347    | -820.39409    | 76.1        |
|                               | Root3                                      |               | -817.79469    |               |             |
|                               | Root4[S <sub>CT</sub> ( <sup>1</sup> ππ*)] |               | -817.75482    | -820.35083    | 103.3       |
|                               | Root5                                      |               | -817.72963    |               |             |
|                               | Root1[T <sub>PP</sub> ( <sup>3</sup> ππ*)] |               | -817.89165    | -820.39841    | 73.4        |
|                               | Root2                                      |               | -817.86938    |               |             |
|                               | Root3                                      |               | -817.82737    |               |             |
|                               | Root4                                      |               | -817.82276    |               |             |
|                               | Root5                                      |               | -817.82189    |               |             |
| <b>Path S<sub>NP</sub>-1</b>  | Root1(S <sub>0</sub> )                     |               | -818.00811    |               |             |
|                               | Root2[S <sub>NP</sub> ( <sup>1</sup> nπ*)] | -817.91816    | -817.91314    | -820.39789    | 73.8        |
|                               | Root3                                      |               | -817.78017    |               |             |
|                               | Root4                                      |               | -817.76186    |               |             |
|                               | Root5                                      |               | -817.73825    |               |             |
| <b>Path S<sub>NP</sub>-2/</b> | Root1(S <sub>0</sub> )                     |               | -817.98415    | -820.48987    | 16.0        |
|                               | Root2[S <sub>NP</sub> ( <sup>1</sup> nπ*)] | -817.92099    | -817.91659    | -820.40842    | 67.2        |

|                                           |                                            |            |            |            |      |
|-------------------------------------------|--------------------------------------------|------------|------------|------------|------|
| <b>STC(S<sub>NP</sub>/T<sub>PP</sub>)</b> | Root3                                      |            | -817.76293 |            |      |
|                                           | Root4                                      |            | -817.75773 |            |      |
|                                           | Root5                                      |            | -817.75369 |            |      |
|                                           |                                            |            |            |            |      |
|                                           | Root1                                      |            | -817.91702 |            |      |
|                                           | Root2[T <sub>PP</sub> ( <sup>1</sup> ππ*)] |            | -817.90353 | -820.40937 | 66.6 |
|                                           | Root3                                      |            | -817.82184 |            |      |
|                                           | Root4                                      |            | -817.77871 |            |      |
|                                           |                                            |            |            |            |      |
|                                           |                                            |            |            |            |      |
| <b>Path T<sub>PP</sub>-1</b>              | Root1[T <sub>PP</sub> ( <sup>1</sup> ππ*)] | -817.93034 | -817.91747 | -820.41132 | 65.3 |
|                                           | Root2                                      |            | -817.91326 |            |      |
|                                           | Root3                                      |            | -817.81042 |            |      |
|                                           | Root4                                      |            | -817.76749 |            |      |
|                                           | Root5                                      |            | -817.76180 |            |      |
|                                           |                                            |            |            |            |      |
|                                           | Root1(S <sub>0</sub> )                     |            | -817.97327 | -820.47776 | 23.6 |
|                                           | Root2                                      |            | -817.91705 |            |      |
|                                           | Root3                                      |            | -817.76381 |            |      |
|                                           | Root4                                      |            | -817.76279 |            |      |
| Root5                                     |                                            | -817.74525 |            |            |      |
|                                           |                                            |            |            |            |      |
| <b>Path T<sub>PP</sub>-2</b>              | Root1[T <sub>PP</sub> ( <sup>1</sup> ππ*)] | -817.93458 | -817.91602 | -820.41913 | 60.4 |
|                                           | Root2                                      |            | -817.82178 |            |      |
|                                           | Root3                                      |            | -817.78870 |            |      |
|                                           | Root4                                      |            | -817.78684 |            |      |
|                                           | Root5                                      |            | -817.75179 |            |      |
|                                           |                                            |            |            |            |      |
|                                           | Root1(S <sub>0</sub> )                     |            | -817.98559 | -820.47769 | 23.7 |
|                                           | Root2                                      |            | -817.77319 |            |      |
|                                           | Root3                                      |            | -817.77101 |            |      |
|                                           | Root4                                      |            | -817.74798 |            |      |
| Root5                                     |                                            | -817.72854 |            |            |      |
|                                           |                                            |            |            |            |      |
| <b>Path T<sub>PP</sub>-3</b>              | Root1[T <sub>PP</sub> ( <sup>1</sup> ππ*)] | -817.94516 | -817.93329 | -820.42375 | 57.5 |
|                                           | Root2                                      |            | -817.81666 |            |      |
|                                           | Root3                                      |            | -817.79487 |            |      |
|                                           | Root4                                      |            | -817.77536 |            |      |
|                                           | Root5                                      |            | -817.76484 |            |      |
|                                           |                                            |            |            |            |      |
|                                           | Root1(S <sub>0</sub> )                     |            | -817.97387 | -820.47402 | 26.0 |
|                                           | Root2                                      |            | -817.81527 |            |      |
|                                           | Root3                                      |            | -817.77629 |            |      |
|                                           | Root4                                      |            | -817.75532 |            |      |
| Root5                                     |                                            | -817.74512 |            |            |      |
|                                           |                                            |            |            |            |      |

|                              |                                            |            |            |            |      |
|------------------------------|--------------------------------------------|------------|------------|------------|------|
| <b>Path T<sub>PP-4</sub></b> | Root1[T <sub>PP</sub> ( <sup>1</sup> ππ*)] | -817.94376 | -817.93238 | -820.42488 | 56.8 |
|                              | Root2                                      |            | -817.82653 |            |      |
|                              | Root3                                      |            | -817.79475 |            |      |
|                              | Root4                                      |            | -817.78112 |            |      |
|                              | Root5                                      |            | -817.77113 |            |      |
|                              | Root1(S <sub>0</sub> )                     |            | -817.97658 | -820.47768 | 23.7 |
|                              | Root2                                      |            | -817.81443 |            |      |
|                              | Root3                                      |            | -817.77813 |            |      |
|                              | Root4                                      |            | -817.75946 |            |      |
|                              | Root5                                      |            | -817.75020 |            |      |
| <b>Path T<sub>PP-5</sub></b> | Root1[T <sub>PP</sub> ( <sup>1</sup> ππ*)] | -817.94325 | -817.93204 | -820.42601 | 56.1 |
|                              | Root2                                      |            | -817.82327 |            |      |
|                              | Root3                                      |            | -817.79196 |            |      |
|                              | Root4                                      |            | -817.78073 |            |      |
|                              | Root5                                      |            | -817.76782 |            |      |
|                              | Root1(S <sub>0</sub> )                     |            | -817.97276 | -820.47535 | 25.2 |
|                              | Root2                                      |            | -817.81561 |            |      |
|                              | Root3                                      |            | -817.77791 |            |      |
|                              | Root4                                      |            | -817.76034 |            |      |
|                              | Root5                                      |            | -817.74757 |            |      |
| <b>Path T<sub>PP-6</sub></b> | Root1[T <sub>PP</sub> ( <sup>1</sup> ππ*)] | -817.94215 | -817.93093 | -820.42582 | 56.2 |
|                              | Root2                                      |            | -817.82533 |            |      |
|                              | Root3                                      |            | -817.79138 |            |      |
|                              | Root4                                      |            | -817.78046 |            |      |
|                              | Root5                                      |            | -817.76936 |            |      |
|                              | Root1(S <sub>0</sub> )                     |            | -817.97354 | -820.47652 | 24.4 |
|                              | Root2                                      |            | -817.81346 |            |      |
|                              | Root3                                      |            | -817.77820 |            |      |
|                              | Root4                                      |            | -817.76190 |            |      |
|                              | Root5                                      |            | -817.74960 |            |      |
| <b>Path T<sub>PP-7</sub></b> | Root1[T <sub>PP</sub> ( <sup>1</sup> ππ*)] | -817.93628 | -817.92569 | -820.42386 | 57.5 |
|                              | Root2                                      |            | -817.83037 |            |      |
|                              | Root3                                      |            | -817.78758 |            |      |
|                              | Root4                                      |            | -817.77841 |            |      |
|                              | Root5                                      |            | -817.77255 |            |      |
|                              | Root1(S <sub>0</sub> )                     |            | -817.97387 | -820.47833 | 23.3 |
|                              | Root2                                      |            | -817.80499 |            |      |
|                              | Root3                                      |            | -817.77674 |            |      |
|                              | Root4                                      |            | -817.76889 |            |      |

|                                                      |                                            |            |            |            |      |
|------------------------------------------------------|--------------------------------------------|------------|------------|------------|------|
|                                                      | Root5                                      |            | -817.75512 |            |      |
|                                                      |                                            |            |            |            |      |
| <b>Path T<sub>PP</sub>-8</b>                         | Root1[T <sub>PP</sub> ( <sup>1</sup> ππ*)] | -817.92725 | -817.91492 | -820.42264 | 58.2 |
|                                                      | Root2                                      |            | -817.80907 |            |      |
|                                                      | Root3                                      |            | -817.78335 |            |      |
|                                                      | Root4                                      |            | -817.78150 |            |      |
|                                                      | Root5                                      |            | -817.77028 |            |      |
|                                                      |                                            |            |            |            |      |
|                                                      | Root1(S <sub>0</sub> )                     |            | -817.96528 | -820.47454 | 25.7 |
|                                                      | Root2                                      |            | -817.79683 |            |      |
|                                                      | Root3                                      |            | -817.77591 |            |      |
|                                                      | Root4                                      |            | -817.76789 |            |      |
|                                                      |                                            |            |            |            |      |
| <b>Path T<sub>PP</sub>-9</b>                         | Root1[T <sub>PP</sub> ( <sup>1</sup> ππ*)] | -817.91818 | -817.91717 | -820.42007 | 59.8 |
|                                                      | Root2                                      |            | -817.81987 |            |      |
|                                                      | Root3                                      |            | -817.78935 |            |      |
|                                                      | Root4                                      |            | -817.77524 |            |      |
|                                                      | Root5                                      |            | -817.75632 |            |      |
|                                                      |                                            |            |            |            |      |
|                                                      | Root1(S <sub>0</sub> )                     |            | -817.95671 | -820.46206 | 33.5 |
|                                                      | Root2                                      |            | -817.81154 |            |      |
|                                                      | Root3                                      |            | -817.78038 |            |      |
|                                                      | Root4                                      |            | -817.77356 |            |      |
|                                                      |                                            |            |            |            |      |
| <b>Path T<sub>PP</sub>-10</b>                        | Root1[T <sub>PP</sub> ( <sup>1</sup> ππ*)] | -817.91530 | -817.90575 | -820.41590 | 62.5 |
|                                                      | Root2                                      |            | -817.80790 |            |      |
|                                                      | Root3                                      |            | -817.77093 |            |      |
|                                                      | Root4                                      |            | -817.76160 |            |      |
|                                                      | Root5                                      |            | -817.75778 |            |      |
|                                                      |                                            |            |            |            |      |
|                                                      | Root1(S <sub>0</sub> )                     |            | -817.94083 | -820.45449 | 38.2 |
|                                                      | Root2                                      |            | -817.80464 |            |      |
|                                                      | Root3                                      |            | -817.77095 |            |      |
|                                                      | Root4                                      |            | -817.76250 |            |      |
|                                                      |                                            |            |            |            |      |
| <b>Path T<sub>PP</sub>-11/<br/>T<sub>PP</sub>-TS</b> | Root1[T <sub>PP</sub> ( <sup>1</sup> ππ*)] | -817.91238 | -817.90231 | -820.41522 | 62.9 |
|                                                      | Root2                                      |            | -817.80020 |            |      |
|                                                      | Root3                                      |            | -817.77008 |            |      |
|                                                      | Root4                                      |            | -817.75832 |            |      |
|                                                      | Root5                                      |            | -817.74496 |            |      |
|                                                      |                                            |            |            |            |      |
|                                                      | Root1(S <sub>0</sub> )                     |            | -817.93012 | -820.44584 | 43.7 |
| Root2                                                |                                            | -817.80015 |            |            |      |

|                               |                                            |            |            |            |      |  |
|-------------------------------|--------------------------------------------|------------|------------|------------|------|--|
|                               | Root3                                      |            | -817.77344 |            |      |  |
|                               | Root4                                      |            | -817.76435 |            |      |  |
|                               | Root5                                      |            | -817.73963 |            |      |  |
|                               |                                            |            |            |            |      |  |
| <b>Path T<sub>pp</sub>-12</b> | Root1[T <sub>pp</sub> ( <sup>1</sup> ππ*)] | -817.91353 | -817.90900 | -820.42050 | 59.6 |  |
|                               | Root2                                      |            | -817.80288 |            |      |  |
|                               | Root3                                      |            | -817.79491 |            |      |  |
|                               | Root4                                      |            | -817.75450 |            |      |  |
|                               | Root5                                      |            | -817.74149 |            |      |  |
|                               |                                            |            |            |            |      |  |
|                               | Root1(S <sub>0</sub> )                     |            | -817.92841 | -820.44092 | 46.8 |  |
|                               | Root2                                      |            | -817.82162 |            |      |  |
|                               | Root3                                      |            | -817.79099 |            |      |  |
|                               | Root4                                      |            | -817.77343 |            |      |  |
| Root5                         |                                            | -817.71441 |            |            |      |  |
|                               |                                            |            |            |            |      |  |
| <b>Path T<sub>pp</sub>-13</b> | Root1[T <sub>pp</sub> ( <sup>1</sup> ππ*)] | -817.92022 | -817.91639 | -820.42685 | 55.6 |  |
|                               | Root2                                      |            | -817.80964 |            |      |  |
|                               | Root3                                      |            | -817.76698 |            |      |  |
|                               | Root4                                      |            | -817.75477 |            |      |  |
|                               | Root5                                      |            | -817.72971 |            |      |  |
|                               |                                            |            |            |            |      |  |
|                               | Root1(S <sub>0</sub> )                     |            | -817.92462 | -820.43782 | 48.7 |  |
|                               | Root2                                      |            | -817.82821 |            |      |  |
|                               | Root3                                      |            | -817.78337 |            |      |  |
|                               | Root4                                      |            | -817.77528 |            |      |  |
| Root5                         |                                            | -817.74965 |            |            |      |  |
|                               |                                            |            |            |            |      |  |
| <b>Path T<sub>pp</sub>-14</b> | Root1[T <sub>pp</sub> ( <sup>1</sup> ππ*)] | -817.92473 | -817.91860 | -820.43016 | 53.5 |  |
|                               | Root2                                      |            | -817.81129 |            |      |  |
|                               | Root3                                      |            | -817.75447 |            |      |  |
|                               | Root4                                      |            | -817.75017 |            |      |  |
|                               | Root5                                      |            | -817.72636 |            |      |  |
|                               |                                            |            |            |            |      |  |
|                               | Root1(S <sub>0</sub> )                     |            | -817.92845 | -820.43565 | 50.1 |  |
|                               | Root2                                      |            | -817.83445 |            |      |  |
|                               | Root3                                      |            | -817.77762 |            |      |  |
|                               | Root4                                      |            | -817.77462 |            |      |  |
| Root5                         |                                            | -817.75050 |            |            |      |  |
|                               |                                            |            |            |            |      |  |
| <b>Path T<sub>pp</sub>-15</b> | Root1[T <sub>pp</sub> ( <sup>1</sup> ππ*)] | -817.93250 | -817.92659 | -820.43469 | 50.7 |  |
|                               | Root2                                      |            | -817.82441 |            |      |  |
|                               | Root3                                      |            | -817.76140 |            |      |  |
|                               | Root4                                      |            | -817.73421 |            |      |  |
|                               | Root5                                      |            | -817.71269 |            |      |  |
|                               |                                            |            |            |            |      |  |

|                                          |                                            |            |            |            |      |  |
|------------------------------------------|--------------------------------------------|------------|------------|------------|------|--|
|                                          | Root1(S <sub>0</sub> )                     |            | -817.92553 | -820.43924 | 47.8 |  |
|                                          | Root2                                      |            | -817.82526 |            |      |  |
|                                          | Root3                                      |            | -817.77730 |            |      |  |
|                                          | Root4                                      |            | -817.75191 |            |      |  |
|                                          | Root5                                      |            | -817.72225 |            |      |  |
|                                          |                                            |            |            |            |      |  |
| <b>Path T<sub>PP</sub>-16</b>            | Root1[T <sub>PP</sub> ( <sup>1</sup> ππ*)] | -817.93714 | -817.93051 | -820.43875 | 48.1 |  |
|                                          | Root2                                      |            | -817.82811 |            |      |  |
|                                          | Root3                                      |            | -817.76387 |            |      |  |
|                                          | Root4                                      |            | -817.73656 |            |      |  |
|                                          | Root5                                      |            | -817.71229 |            |      |  |
|                                          |                                            |            |            |            |      |  |
|                                          | Root1(S <sub>0</sub> )                     |            | -817.94603 | -820.44163 | 46.3 |  |
|                                          | Root2                                      |            | -817.85283 |            |      |  |
|                                          | Root3                                      |            | -817.79049 |            |      |  |
|                                          | Root4                                      |            | -817.77150 |            |      |  |
|                                          | Root5                                      |            | -817.73766 |            |      |  |
|                                          |                                            |            |            |            |      |  |
| <b>Path T<sub>PP</sub>-17</b>            | Root1[T <sub>PP</sub> ( <sup>1</sup> ππ*)] | -817.94170 | -817.93477 | -820.44323 | 45.3 |  |
|                                          | Root2                                      |            | -817.83037 |            |      |  |
|                                          | Root3                                      |            | -817.76461 |            |      |  |
|                                          | Root4                                      |            | -817.73914 |            |      |  |
|                                          | Root5                                      |            | -817.71245 |            |      |  |
|                                          |                                            |            |            |            |      |  |
|                                          | Root1(S <sub>0</sub> )                     |            | -817.95192 | -820.44614 | 43.5 |  |
|                                          | Root2                                      |            | -817.85674 |            |      |  |
|                                          | Root3                                      |            | -817.79533 |            |      |  |
|                                          | Root4                                      |            | -817.77360 |            |      |  |
|                                          | Root5                                      |            | -817.74113 |            |      |  |
|                                          |                                            |            |            |            |      |  |
| <b>STC(T<sub>PP</sub>/S<sub>0</sub>)</b> | Root1[T <sub>PP</sub> ( <sup>1</sup> ππ*)] | -817.94359 | -817.93646 | -820.44503 | 44.2 |  |
|                                          | Root2                                      |            | -817.83136 |            |      |  |
|                                          | Root3                                      |            | -817.76491 |            |      |  |
|                                          | Root4                                      |            | -817.74028 |            |      |  |
|                                          | Root5                                      |            | -817.71281 |            |      |  |
|                                          |                                            |            |            |            |      |  |
|                                          | Root1(S <sub>0</sub> )                     |            | -817.95400 | -820.44781 | 42.4 |  |
|                                          | Root2                                      |            | -817.85801 |            |      |  |
|                                          | Root3                                      |            | -817.79714 |            |      |  |
|                                          | Root4                                      |            | -817.77424 |            |      |  |
|                                          | Root5                                      |            | -817.74222 |            |      |  |
|                                          |                                            |            |            |            |      |  |
| <b>Path S<sub>0</sub>*-1</b>             | Root1(S <sub>0</sub> )                     | -817.94480 | -817.93242 | -820.45004 | 41.0 |  |
|                                          | Root2                                      |            | -817.83101 |            |      |  |
|                                          | Root3                                      |            | -817.77353 |            |      |  |
|                                          | Root4                                      |            | -817.74835 |            |      |  |



|                                                                            |                        |            |            |            |      |
|----------------------------------------------------------------------------|------------------------|------------|------------|------------|------|
|                                                                            | Root5                  |            | -817.70185 |            |      |
| <b>Path S<sub>0</sub><sup>*</sup>-2</b>                                    | Root1(S <sub>0</sub> ) | -817.94872 | -817.93763 | -820.45503 | 37.9 |
|                                                                            | Root2                  |            | -817.83234 |            |      |
|                                                                            | Root3                  |            | -817.77273 |            |      |
|                                                                            | Root4                  |            | -817.75546 |            |      |
|                                                                            | Root5                  |            | -817.70379 |            |      |
| <b>Path S<sub>0</sub><sup>*</sup>-3/<br/>S<sub>0</sub><sup>*</sup>-Int</b> | Root1(S <sub>0</sub> ) | -817.94828 | -817.93773 | -820.45846 | 35.8 |
|                                                                            | Root2                  |            | -817.82684 |            |      |
|                                                                            | Root3                  |            | -817.76558 |            |      |
|                                                                            | Root4                  |            | -817.74886 |            |      |
|                                                                            | Root5                  |            | -817.70261 |            |      |
| <b>Path S<sub>0</sub><sup>*</sup>-4</b>                                    | Root1(S <sub>0</sub> ) | -817.92909 | -817.92932 | -820.45303 | 39.2 |
|                                                                            | Root2                  |            | -817.81440 |            |      |
|                                                                            | Root3                  |            | -817.74794 |            |      |
|                                                                            | Root4                  |            | -817.74011 |            |      |
|                                                                            | Root5                  |            | -817.69320 |            |      |
| <b>Path S<sub>0</sub><sup>*</sup>-5</b>                                    | Root1(S <sub>0</sub> ) | -817.92224 | -817.92190 | -820.44715 | 42.9 |
|                                                                            | Root2                  |            | -817.80353 |            |      |
|                                                                            | Root3                  |            | -817.73695 |            |      |
|                                                                            | Root4                  |            | -817.73265 |            |      |
|                                                                            | Root5                  |            | -817.68415 |            |      |
| <b>Path S<sub>0</sub><sup>*</sup>-6</b>                                    | Root1(S <sub>0</sub> ) | -817.90888 | -817.91706 | -820.44430 | 44.6 |
|                                                                            | Root2                  |            | -817.78847 |            |      |
|                                                                            | Root3                  |            | -817.73797 |            |      |
|                                                                            | Root4                  |            | -817.72012 |            |      |
|                                                                            | Root5                  |            | -817.67846 |            |      |
| <b>Path S<sub>0</sub><sup>*</sup>-7</b>                                    | Root1(S <sub>0</sub> ) | -817.90884 | -817.91769 | -820.44348 | 45.2 |
|                                                                            | Root2                  |            | -817.77963 |            |      |
|                                                                            | Root3                  |            | -817.74340 |            |      |
|                                                                            | Root4                  |            | -817.71139 |            |      |
|                                                                            | Root5                  |            | -817.67549 |            |      |
| <b>Path S<sub>0</sub><sup>*</sup>-8</b>                                    | Root1(S <sub>0</sub> ) | -817.90739 | -817.92603 | -820.44895 | 41.7 |
|                                                                            | Root2                  |            | -817.76968 |            |      |
|                                                                            | Root3                  |            | -817.75160 |            |      |
|                                                                            | Root4                  |            | -817.70444 |            |      |
|                                                                            | Root5                  |            | -817.67351 |            |      |
| <b>Path S<sub>0</sub><sup>*</sup>-9</b>                                    | Root1(S <sub>0</sub> ) | -817.93214 | -817.92942 | -820.45220 | 39.7 |
|                                                                            | Root2                  |            | -817.77451 |            |      |
|                                                                            | Root3                  |            | -817.75739 |            |      |

|                               |                        |            |            |            |       |
|-------------------------------|------------------------|------------|------------|------------|-------|
|                               | Root4                  |            | -817.70913 |            |       |
|                               | Root5                  |            | -817.67882 |            |       |
| <b>Path S<sub>0</sub>*-10</b> | Root1(S <sub>0</sub> ) | -817.95928 | -817.96791 | -820.47445 | 25.7  |
|                               | Root2                  |            | -817.75968 |            |       |
|                               | Root3                  |            | -817.69893 |            |       |
|                               | Root4                  |            | -817.66017 |            |       |
|                               | Root5                  |            | -817.64412 |            |       |
| <b>Path S<sub>0</sub>*-11</b> | Root1(S <sub>0</sub> ) | -817.98707 | -817.99262 | -820.49609 | 12.1  |
|                               | Root2                  |            | -817.78151 |            |       |
|                               | Root3                  |            | -817.72091 |            |       |
|                               | Root4                  |            | -817.68047 |            |       |
|                               | Root5                  |            | -817.66393 |            |       |
| <b>Path S<sub>0</sub>*-12</b> | Root1(S <sub>0</sub> ) | -818.01017 | -818.01412 | -820.51616 | -0.5  |
|                               | Root2                  |            | -817.80219 |            |       |
|                               | Root3                  |            | -817.74233 |            |       |
|                               | Root4                  |            | -817.70110 |            |       |
|                               | Root5                  |            | -817.68390 |            |       |
| <b>trans-P</b>                | Root1(S <sub>0</sub> ) | -818.04608 | -818.05362 | -820.55105 | -22.3 |
|                               | Root2                  |            | -817.84200 |            |       |
|                               | Root3                  |            | -817.78109 |            |       |
|                               | Root4                  |            | -817.74345 |            |       |
|                               | Root5                  |            | -817.72135 |            |       |
| <b>cis-P</b>                  | Root1(S <sub>0</sub> ) | -818.05619 | -818.06370 | -820.56019 | -28.1 |
|                               | Root2                  |            | -817.85358 |            |       |
|                               | Root3                  |            | -817.79208 |            |       |
|                               | Root4                  |            | -817.75694 |            |       |
|                               | Root5                  |            | -817.73287 |            |       |

**Table S5.** Absolute energies (A.E., Hartree), relative energies (R.E., kcal/mol) for the optimized structures of free enaminone **2** along reaction pathway of the <sup>1</sup>nπ\* decay, and the 6π photocyclization reaction pathway in the triplet excited state, as well as the stepwise [1,2]-H shift processes in ground state by CASPT2//CASSCF(8e/7o)/PCM/6-31G\*\* calculations. The corresponding energy profiles are plotted in Figure S8.

| <b>2</b>                 |                        | <b>CASSCF</b> | <b>RASSCF</b> | <b>CASPT2</b> |             |
|--------------------------|------------------------|---------------|---------------|---------------|-------------|
|                          |                        | <b>A.E.</b>   | <b>A.E.</b>   | <b>A.E.</b>   | <b>R.E.</b> |
| <b>S<sub>0</sub>-Min</b> | Root1(S <sub>0</sub> ) | -818.05468    | -818.02669    | -820.51544    | 0.0         |

|                                                                      |                                            |            |            |            |       |
|----------------------------------------------------------------------|--------------------------------------------|------------|------------|------------|-------|
|                                                                      | Root2[S <sub>NP</sub> ( <sup>1</sup> nπ*)] |            | -817.83347 | -820.39409 | 76.1  |
|                                                                      | Root3                                      |            | -817.79469 |            |       |
|                                                                      | Root4[S <sub>CT</sub> ( <sup>1</sup> ππ*)] |            | -817.75482 | -820.35083 | 103.3 |
|                                                                      | Root5                                      |            | -817.72963 |            |       |
|                                                                      |                                            |            |            |            |       |
|                                                                      | Root1[T <sub>PP</sub> ( <sup>3</sup> ππ*)] |            | -817.89165 | -820.39841 | 73.4  |
|                                                                      | Root2                                      |            | -817.86938 |            |       |
|                                                                      | Root3                                      |            | -817.82737 |            |       |
|                                                                      | Root4                                      |            | -817.82276 |            |       |
|                                                                      | Root5                                      |            | -817.82189 |            |       |
|                                                                      |                                            |            |            |            |       |
| <b>Path S<sub>NP</sub>-1</b>                                         | Root1(S <sub>0</sub> )                     |            | -818.00811 |            |       |
|                                                                      | Root2[S <sub>NP</sub> ( <sup>1</sup> nπ*)] | -817.91816 | -817.91314 | -820.39789 | 73.8  |
|                                                                      | Root3                                      |            | -817.78017 |            |       |
|                                                                      | Root4                                      |            | -817.76186 |            |       |
|                                                                      | Root5                                      |            | -817.73825 |            |       |
|                                                                      |                                            |            |            |            |       |
| <b>Path S<sub>NP</sub>-2/<br/>STC(S<sub>NP</sub>/T<sub>PP</sub>)</b> | Root1(S <sub>0</sub> )                     |            | -817.98415 | -820.48987 | 16.0  |
|                                                                      | Root2[S <sub>NP</sub> ( <sup>1</sup> nπ*)] | -817.92099 | -817.91659 | -820.40842 | 67.2  |
|                                                                      | Root3                                      |            | -817.76293 |            |       |
|                                                                      | Root4                                      |            | -817.75773 |            |       |
|                                                                      | Root5                                      |            | -817.75369 |            |       |
|                                                                      |                                            |            |            |            |       |
|                                                                      | Root1                                      |            | -817.91702 |            |       |
|                                                                      | Root2[T <sub>PP</sub> ( <sup>1</sup> ππ*)] |            | -817.90353 | -820.40937 | 66.6  |
|                                                                      | Root3                                      |            | -817.82184 |            |       |
|                                                                      | Root4                                      |            | -817.77871 |            |       |
| Root5                                                                |                                            | -817.77605 |            |            |       |
|                                                                      |                                            |            |            |            |       |
| <b>Path T<sub>PP</sub>-1</b>                                         | Root1[T <sub>PP</sub> ( <sup>1</sup> ππ*)] | -817.93034 | -817.91747 | -820.41132 | 65.3  |
|                                                                      | Root2                                      |            | -817.91326 |            |       |
|                                                                      | Root3                                      |            | -817.81042 |            |       |
|                                                                      | Root4                                      |            | -817.76749 |            |       |
|                                                                      | Root5                                      |            | -817.76180 |            |       |
|                                                                      |                                            |            |            |            |       |
|                                                                      | Root1(S <sub>0</sub> )                     |            | -817.97327 | -820.47776 | 23.6  |
|                                                                      | Root2                                      |            | -817.91705 |            |       |
|                                                                      | Root3                                      |            | -817.76381 |            |       |
|                                                                      | Root4                                      |            | -817.76279 |            |       |
| Root5                                                                |                                            | -817.74525 |            |            |       |
|                                                                      |                                            |            |            |            |       |
| <b>Path T<sub>PP</sub>-2</b>                                         | Root1[T <sub>PP</sub> ( <sup>1</sup> ππ*)] | -817.93458 | -817.91602 | -820.41913 | 60.4  |
|                                                                      | Root2                                      |            | -817.82178 |            |       |
|                                                                      | Root3                                      |            | -817.78870 |            |       |
|                                                                      | Root4                                      |            | -817.78684 |            |       |
|                                                                      | Root5                                      |            | -817.75179 |            |       |

|                              |                                            |            |            |            |      |
|------------------------------|--------------------------------------------|------------|------------|------------|------|
|                              | Root1(S <sub>0</sub> )                     |            | -817.98559 | -820.47769 | 23.7 |
|                              | Root2                                      |            | -817.77319 |            |      |
|                              | Root3                                      |            | -817.77101 |            |      |
|                              | Root4                                      |            | -817.74798 |            |      |
|                              | Root5                                      |            | -817.72854 |            |      |
| <b>Path T<sub>PP-3</sub></b> | Root1[T <sub>PP</sub> ( <sup>1</sup> ππ*)] | -817.94516 | -817.93329 | -820.42375 | 57.5 |
|                              | Root2                                      |            | -817.81666 |            |      |
|                              | Root3                                      |            | -817.79487 |            |      |
|                              | Root4                                      |            | -817.77536 |            |      |
|                              | Root5                                      |            | -817.76484 |            |      |
|                              | Root1(S <sub>0</sub> )                     |            | -817.97387 | -820.47402 | 26.0 |
|                              | Root2                                      |            | -817.81527 |            |      |
|                              | Root3                                      |            | -817.77629 |            |      |
|                              | Root4                                      |            | -817.75532 |            |      |
|                              | Root5                                      |            | -817.74512 |            |      |
| <b>Path T<sub>PP-4</sub></b> | Root1[T <sub>PP</sub> ( <sup>1</sup> ππ*)] | -817.94376 | -817.93238 | -820.42488 | 56.8 |
|                              | Root2                                      |            | -817.82653 |            |      |
|                              | Root3                                      |            | -817.79475 |            |      |
|                              | Root4                                      |            | -817.78112 |            |      |
|                              | Root5                                      |            | -817.77113 |            |      |
|                              | Root1(S <sub>0</sub> )                     |            | -817.97658 | -820.47768 | 23.7 |
|                              | Root2                                      |            | -817.81443 |            |      |
|                              | Root3                                      |            | -817.77813 |            |      |
|                              | Root4                                      |            | -817.75946 |            |      |
|                              | Root5                                      |            | -817.75020 |            |      |
| <b>Path T<sub>PP-5</sub></b> | Root1[T <sub>PP</sub> ( <sup>1</sup> ππ*)] | -817.94325 | -817.93204 | -820.42601 | 56.1 |
|                              | Root2                                      |            | -817.82327 |            |      |
|                              | Root3                                      |            | -817.79196 |            |      |
|                              | Root4                                      |            | -817.78073 |            |      |
|                              | Root5                                      |            | -817.76782 |            |      |
|                              | Root1(S <sub>0</sub> )                     |            | -817.97276 | -820.47535 | 25.2 |
|                              | Root2                                      |            | -817.81561 |            |      |
|                              | Root3                                      |            | -817.77791 |            |      |
|                              | Root4                                      |            | -817.76034 |            |      |
|                              | Root5                                      |            | -817.74757 |            |      |
| <b>Path T<sub>PP-6</sub></b> | Root1[T <sub>PP</sub> ( <sup>1</sup> ππ*)] | -817.94215 | -817.93093 | -820.42582 | 56.2 |
|                              | Root2                                      |            | -817.82533 |            |      |
|                              | Root3                                      |            | -817.79138 |            |      |

|                               |                                            |            |            |            |      |
|-------------------------------|--------------------------------------------|------------|------------|------------|------|
|                               | Root4                                      |            | -817.78046 |            |      |
|                               | Root5                                      |            | -817.76936 |            |      |
|                               | Root1(S <sub>0</sub> )                     |            | -817.97354 | -820.47652 | 24.4 |
|                               | Root2                                      |            | -817.81346 |            |      |
|                               | Root3                                      |            | -817.77820 |            |      |
|                               | Root4                                      |            | -817.76190 |            |      |
|                               | Root5                                      |            | -817.74960 |            |      |
|                               |                                            |            |            |            |      |
| <b>Path T<sub>pp</sub>-7</b>  | Root1[T <sub>pp</sub> ( <sup>1</sup> ππ*)] | -817.93628 | -817.92569 | -820.42386 | 57.5 |
|                               | Root2                                      |            | -817.83037 |            |      |
|                               | Root3                                      |            | -817.78758 |            |      |
|                               | Root4                                      |            | -817.77841 |            |      |
|                               | Root5                                      |            | -817.77255 |            |      |
|                               | Root1(S <sub>0</sub> )                     |            | -817.97387 | -820.47833 | 23.3 |
|                               | Root2                                      |            | -817.80499 |            |      |
|                               | Root3                                      |            | -817.77674 |            |      |
|                               | Root4                                      |            | -817.76889 |            |      |
|                               | Root5                                      |            | -817.75512 |            |      |
|                               |                                            |            |            |            |      |
| <b>Path T<sub>pp</sub>-8</b>  | Root1[T <sub>pp</sub> ( <sup>1</sup> ππ*)] | -817.92725 | -817.91492 | -820.42264 | 58.2 |
|                               | Root2                                      |            | -817.80907 |            |      |
|                               | Root3                                      |            | -817.78335 |            |      |
|                               | Root4                                      |            | -817.78150 |            |      |
|                               | Root5                                      |            | -817.77028 |            |      |
|                               | Root1(S <sub>0</sub> )                     |            | -817.96528 | -820.47454 | 25.7 |
|                               | Root2                                      |            | -817.79683 |            |      |
|                               | Root3                                      |            | -817.77591 |            |      |
|                               | Root4                                      |            | -817.76789 |            |      |
|                               | Root5                                      |            | -817.75795 |            |      |
|                               |                                            |            |            |            |      |
| <b>Path T<sub>pp</sub>-9</b>  | Root1[T <sub>pp</sub> ( <sup>1</sup> ππ*)] | -817.91818 | -817.91717 | -820.42007 | 59.8 |
|                               | Root2                                      |            | -817.81987 |            |      |
|                               | Root3                                      |            | -817.78935 |            |      |
|                               | Root4                                      |            | -817.77524 |            |      |
|                               | Root5                                      |            | -817.75632 |            |      |
|                               | Root1(S <sub>0</sub> )                     |            | -817.95671 | -820.46206 | 33.5 |
|                               | Root2                                      |            | -817.81154 |            |      |
|                               | Root3                                      |            | -817.78038 |            |      |
|                               | Root4                                      |            | -817.77356 |            |      |
|                               | Root5                                      |            | -817.73683 |            |      |
|                               |                                            |            |            |            |      |
| <b>Path T<sub>pp</sub>-10</b> | Root1[T <sub>pp</sub> ( <sup>1</sup> ππ*)] | -817.91530 | -817.90575 | -820.41590 | 62.5 |

|                                                      |                                            |            |            |            |      |
|------------------------------------------------------|--------------------------------------------|------------|------------|------------|------|
|                                                      | Root2                                      |            | -817.80790 |            |      |
|                                                      | Root3                                      |            | -817.77093 |            |      |
|                                                      | Root4                                      |            | -817.76160 |            |      |
|                                                      | Root5                                      |            | -817.75778 |            |      |
|                                                      |                                            |            |            |            |      |
|                                                      | Root1(S <sub>0</sub> )                     |            | -817.94083 | -820.45449 | 38.2 |
|                                                      | Root2                                      |            | -817.80464 |            |      |
|                                                      | Root3                                      |            | -817.77095 |            |      |
|                                                      | Root4                                      |            | -817.76250 |            |      |
|                                                      | Root5                                      |            | -817.75149 |            |      |
|                                                      |                                            |            |            |            |      |
| <b>Path T<sub>PP-11</sub>/<br/>T<sub>PP-TS</sub></b> | Root1[T <sub>PP</sub> ( <sup>1</sup> ππ*)] | -817.91238 | -817.90231 | -820.41522 | 62.9 |
|                                                      | Root2                                      |            | -817.80020 |            |      |
|                                                      | Root3                                      |            | -817.77008 |            |      |
|                                                      | Root4                                      |            | -817.75832 |            |      |
|                                                      | Root5                                      |            | -817.74496 |            |      |
|                                                      |                                            |            |            |            |      |
|                                                      | Root1(S <sub>0</sub> )                     |            | -817.93012 | -820.44584 | 43.7 |
|                                                      | Root2                                      |            | -817.80015 |            |      |
|                                                      | Root3                                      |            | -817.77344 |            |      |
|                                                      | Root4                                      |            | -817.76435 |            |      |
|                                                      | Root5                                      |            | -817.73963 |            |      |
|                                                      |                                            |            |            |            |      |
| <b>Path T<sub>PP-12</sub></b>                        | Root1[T <sub>PP</sub> ( <sup>1</sup> ππ*)] | -817.91353 | -817.90900 | -820.42050 | 59.6 |
|                                                      | Root2                                      |            | -817.80288 |            |      |
|                                                      | Root3                                      |            | -817.79491 |            |      |
|                                                      | Root4                                      |            | -817.75450 |            |      |
|                                                      | Root5                                      |            | -817.74149 |            |      |
|                                                      |                                            |            |            |            |      |
|                                                      | Root1(S <sub>0</sub> )                     |            | -817.92841 | -820.44092 | 46.8 |
|                                                      | Root2                                      |            | -817.82162 |            |      |
|                                                      | Root3                                      |            | -817.79099 |            |      |
|                                                      | Root4                                      |            | -817.77343 |            |      |
|                                                      | Root5                                      |            | -817.71441 |            |      |
|                                                      |                                            |            |            |            |      |
| <b>Path T<sub>PP-13</sub></b>                        | Root1[T <sub>PP</sub> ( <sup>1</sup> ππ*)] | -817.92022 | -817.91639 | -820.42685 | 55.6 |
|                                                      | Root2                                      |            | -817.80964 |            |      |
|                                                      | Root3                                      |            | -817.76698 |            |      |
|                                                      | Root4                                      |            | -817.75477 |            |      |
|                                                      | Root5                                      |            | -817.72971 |            |      |
|                                                      |                                            |            |            |            |      |
|                                                      | Root1(S <sub>0</sub> )                     |            | -817.92462 | -820.43782 | 48.7 |
|                                                      | Root2                                      |            | -817.82821 |            |      |
|                                                      | Root3                                      |            | -817.78337 |            |      |
|                                                      | Root4                                      |            | -817.77528 |            |      |
|                                                      | Root5                                      |            | -817.74965 |            |      |

|                               |                                            |                                            |            |            |            |
|-------------------------------|--------------------------------------------|--------------------------------------------|------------|------------|------------|
| <b>Path T<sub>pp</sub>-14</b> | Root1[T <sub>pp</sub> ( <sup>1</sup> ππ*)] | -817.92473                                 | -817.91860 | -820.43016 | 53.5       |
|                               | Root2                                      |                                            | -817.81129 |            |            |
|                               | Root3                                      |                                            | -817.75447 |            |            |
|                               | Root4                                      |                                            | -817.75017 |            |            |
|                               | Root5                                      |                                            | -817.72636 |            |            |
|                               | Root1(S <sub>0</sub> )                     |                                            | -817.92845 | -820.43565 | 50.1       |
|                               | Root2                                      |                                            | -817.83445 |            |            |
|                               | Root3                                      |                                            | -817.77762 |            |            |
|                               | Root4                                      |                                            | -817.77462 |            |            |
|                               | Root5                                      |                                            | -817.75050 |            |            |
|                               | <b>Path T<sub>pp</sub>-15</b>              | Root1[T <sub>pp</sub> ( <sup>1</sup> ππ*)] | -817.93250 | -817.92659 | -820.43469 |
| Root2                         |                                            |                                            | -817.82441 |            |            |
| Root3                         |                                            |                                            | -817.76140 |            |            |
| Root4                         |                                            |                                            | -817.73421 |            |            |
| Root5                         |                                            |                                            | -817.71269 |            |            |
| Root1(S <sub>0</sub> )        |                                            |                                            | -817.92553 | -820.43924 | 47.8       |
| Root2                         |                                            |                                            | -817.82526 |            |            |
| Root3                         |                                            |                                            | -817.77730 |            |            |
| Root4                         |                                            |                                            | -817.75191 |            |            |
| Root5                         |                                            |                                            | -817.72225 |            |            |
| <b>Path T<sub>pp</sub>-16</b> |                                            | Root1[T <sub>pp</sub> ( <sup>1</sup> ππ*)] | -817.93714 | -817.93051 | -820.43875 |
|                               | Root2                                      |                                            | -817.82811 |            |            |
|                               | Root3                                      |                                            | -817.76387 |            |            |
|                               | Root4                                      |                                            | -817.73656 |            |            |
|                               | Root5                                      |                                            | -817.71229 |            |            |
|                               | Root1(S <sub>0</sub> )                     |                                            | -817.94603 | -820.44163 | 46.3       |
|                               | Root2                                      |                                            | -817.85283 |            |            |
|                               | Root3                                      |                                            | -817.79049 |            |            |
|                               | Root4                                      |                                            | -817.77150 |            |            |
|                               | Root5                                      |                                            | -817.73766 |            |            |
|                               | <b>Path T<sub>pp</sub>-17</b>              | Root1[T <sub>pp</sub> ( <sup>1</sup> ππ*)] | -817.94170 | -817.93477 | -820.44323 |
| Root2                         |                                            |                                            | -817.83037 |            |            |
| Root3                         |                                            |                                            | -817.76461 |            |            |
| Root4                         |                                            |                                            | -817.73914 |            |            |
| Root5                         |                                            |                                            | -817.71245 |            |            |
| Root1(S <sub>0</sub> )        |                                            |                                            | -817.95192 | -820.44614 | 43.5       |
| Root2                         |                                            |                                            | -817.85674 |            |            |
| Root3                         |                                            |                                            | -817.79533 |            |            |

|                                                                |                                            |            |            |            |      |
|----------------------------------------------------------------|--------------------------------------------|------------|------------|------------|------|
|                                                                | Root4                                      |            | -817.77360 |            |      |
|                                                                | Root5                                      |            | -817.74113 |            |      |
|                                                                |                                            |            |            |            |      |
| <b>STC(T<sub>PP</sub>/S<sub>0</sub>)</b>                       | Root1[T <sub>PP</sub> ( <sup>1</sup> ππ*)] | -817.94359 | -817.93646 | -820.44503 | 44.2 |
|                                                                | Root2                                      |            | -817.83136 |            |      |
|                                                                | Root3                                      |            | -817.76491 |            |      |
|                                                                | Root4                                      |            | -817.74028 |            |      |
|                                                                | Root5                                      |            | -817.71281 |            |      |
|                                                                |                                            |            |            |            |      |
|                                                                | Root1(S <sub>0</sub> )                     |            | -817.95400 | -820.44781 | 42.4 |
|                                                                | Root2                                      |            | -817.85801 |            |      |
|                                                                | Root3                                      |            | -817.79714 |            |      |
|                                                                | Root4                                      |            | -817.77424 |            |      |
| Root5                                                          |                                            | -817.74222 |            |            |      |
|                                                                |                                            |            |            |            |      |
| <b>Path S<sub>0</sub><sup>*</sup>-1</b>                        | Root1(S <sub>0</sub> )                     | -817.94480 | -817.93242 | -820.45004 | 41.0 |
|                                                                | Root2                                      |            | -817.83101 |            |      |
|                                                                | Root3                                      |            | -817.77353 |            |      |
|                                                                | Root4                                      |            | -817.74835 |            |      |
|                                                                | Root5                                      |            | -817.70185 |            |      |
|                                                                |                                            |            |            |            |      |
| <b>Path S<sub>0</sub><sup>*</sup>-2</b>                        | Root1(S <sub>0</sub> )                     | -817.94872 | -817.93763 | -820.45503 | 37.9 |
|                                                                | Root2                                      |            | -817.83234 |            |      |
|                                                                | Root3                                      |            | -817.77273 |            |      |
|                                                                | Root4                                      |            | -817.75546 |            |      |
|                                                                | Root5                                      |            | -817.70379 |            |      |
|                                                                |                                            |            |            |            |      |
| <b>Path S<sub>0</sub><sup>*</sup>-3/<br/>S<sub>0</sub>-Int</b> | Root1(S <sub>0</sub> )                     | -817.94828 | -817.93773 | -820.45846 | 35.8 |
|                                                                | Root2                                      |            | -817.82684 |            |      |
|                                                                | Root3                                      |            | -817.76558 |            |      |
|                                                                | Root4                                      |            | -817.74886 |            |      |
|                                                                | Root5                                      |            | -817.70261 |            |      |
|                                                                |                                            |            |            |            |      |
| <b>Path S<sub>0</sub><sup>*</sup>-4</b>                        | Root1(S <sub>0</sub> )                     | -817.93246 | -817.92407 | -820.45196 | 39.8 |
|                                                                | Root2                                      |            | -817.81563 |            |      |
|                                                                | Root3                                      |            | -817.76912 |            |      |
|                                                                | Root4                                      |            | -817.71878 |            |      |
|                                                                | Root5                                      |            | -817.69012 |            |      |
|                                                                |                                            |            |            |            |      |
| <b>Path S<sub>0</sub><sup>*</sup>-5</b>                        | Root1(S <sub>0</sub> )                     | -817.91600 | -817.90743 | -820.43771 | 48.8 |
|                                                                | Root2                                      |            | -817.80054 |            |      |
|                                                                | Root3                                      |            | -817.75884 |            |      |
|                                                                | Root4                                      |            | -817.68771 |            |      |
|                                                                | Root5                                      |            | -817.67445 |            |      |
|                                                                |                                            |            |            |            |      |
| <b>Path S<sub>0</sub><sup>*</sup>-6</b>                        | Root1(S <sub>0</sub> )                     | -817.91077 | -817.90191 | -820.41543 | 62.8 |



|                                                                                  |                        |            |            |            |      |
|----------------------------------------------------------------------------------|------------------------|------------|------------|------------|------|
|                                                                                  | Root2                  |            | -817.79476 |            |      |
|                                                                                  | Root3                  |            | -817.73415 |            |      |
|                                                                                  | Root4                  |            | -817.69693 |            |      |
|                                                                                  | Root5                  |            | -817.66504 |            |      |
|                                                                                  |                        |            |            |            |      |
| <b>Path S<sub>0</sub><sup>*</sup>-7</b>                                          | Root1(S <sub>0</sub> ) | -817.90490 | -817.89646 | -820.41078 | 65.7 |
|                                                                                  | Root2                  |            | -817.78924 |            |      |
|                                                                                  | Root3                  |            | -817.73050 |            |      |
|                                                                                  | Root4                  |            | -817.69164 |            |      |
|                                                                                  | Root5                  |            | -817.65807 |            |      |
|                                                                                  |                        |            |            |            |      |
| <b>Path S<sub>0</sub><sup>*</sup>-8</b>                                          | Root1(S <sub>0</sub> ) | -817.88343 | -817.87428 | -820.39447 | 75.9 |
|                                                                                  | Root2                  |            | -817.76716 |            |      |
|                                                                                  | Root3                  |            | -817.71470 |            |      |
|                                                                                  | Root4                  |            | -817.67177 |            |      |
|                                                                                  | Root5                  |            | -817.64428 |            |      |
|                                                                                  |                        |            |            |            |      |
| <b>Path S<sub>0</sub><sup>*</sup>-9/<br/>S<sub>0</sub>-TS1<sup>(1,2-H)</sup></b> | Root1(S <sub>0</sub> ) | -817.86202 | -817.85871 | -820.38955 | 79.0 |
|                                                                                  | Root2                  |            | -817.74792 |            |      |
|                                                                                  | Root3                  |            | -817.72248 |            |      |
|                                                                                  | Root4                  |            | -817.68948 |            |      |
|                                                                                  | Root5                  |            | -817.66995 |            |      |
|                                                                                  |                        |            |            |            |      |
| <b>Path S<sub>0</sub><sup>*</sup>-10</b>                                         | Root1(S <sub>0</sub> ) | -817.88436 | -817.87874 | -820.39051 | 78.4 |
|                                                                                  | Root2                  |            | -817.76804 |            |      |
|                                                                                  | Root3                  |            | -817.73869 |            |      |
|                                                                                  | Root4                  |            | -817.72249 |            |      |
|                                                                                  | Root5                  |            | -817.68745 |            |      |
|                                                                                  |                        |            |            |            |      |
| <b>Path S<sub>0</sub><sup>*</sup>-11</b>                                         | Root1(S <sub>0</sub> ) | -817.89275 | -817.88962 | -820.39776 | 73.8 |
|                                                                                  | Root2                  |            | -817.77913 |            |      |
|                                                                                  | Root3                  |            | -817.75244 |            |      |
|                                                                                  | Root4                  |            | -817.73547 |            |      |
|                                                                                  | Root5                  |            | -817.69263 |            |      |
|                                                                                  |                        |            |            |            |      |
| <b>Path S<sub>0</sub><sup>*</sup>-12</b>                                         | Root1(S <sub>0</sub> ) | -817.90682 | -817.90099 | -820.40592 | 68.7 |
|                                                                                  | Root2                  |            | -817.79076 |            |      |
|                                                                                  | Root3                  |            | -817.76872 |            |      |
|                                                                                  | Root4                  |            | -817.75234 |            |      |
|                                                                                  | Root5                  |            | -817.69189 |            |      |
|                                                                                  |                        |            |            |            |      |
| <b>Path S<sub>0</sub><sup>*</sup>-13</b>                                         | Root1(S <sub>0</sub> ) | -817.93719 | -817.92544 | -820.42982 | 53.7 |
|                                                                                  | Root2                  |            | -817.81447 |            |      |
|                                                                                  | Root3                  |            | -817.80636 |            |      |
|                                                                                  | Root4                  |            | -817.78714 |            |      |
|                                                                                  | Root5                  |            | -817.69273 |            |      |
|                                                                                  |                        |            |            |            |      |

|                                                                               |                |            |            |            |      |
|-------------------------------------------------------------------------------|----------------|------------|------------|------------|------|
| <b>Path <math>S_0^*</math>-14/<br/><math>S_0</math>-Int2</b>                  | Root1( $S_0$ ) | -817.93755 | -817.93738 | -820.43610 | 49.8 |
|                                                                               | Root2          |            | -817.82776 |            |      |
|                                                                               | Root3          |            | -817.82270 |            |      |
|                                                                               | Root4          |            | -817.75327 |            |      |
|                                                                               | Root5          |            | -817.71202 |            |      |
| <b>Path <math>S_0^*</math>-15</b>                                             | Root1( $S_0$ ) | -817.94774 | -817.94774 | -817.84234 | 47.9 |
|                                                                               | Root2          |            | -817.84234 |            |      |
|                                                                               | Root3          |            | -817.82156 |            |      |
|                                                                               | Root4          |            | -817.78459 |            |      |
|                                                                               | Root5          |            | -817.72217 |            |      |
| <b>Path <math>S_0^*</math>-16/<br/><math>S_0</math>-TS1<sup>(1,2-H)</sup></b> | Root1( $S_0$ ) | -817.92811 | -817.94645 | -820.44242 | 45.8 |
|                                                                               | Root2          |            | -817.83796 |            |      |
|                                                                               | Root3          |            | -817.81902 |            |      |
|                                                                               | Root4          |            | -817.77981 |            |      |
|                                                                               | Root5          |            | -817.72063 |            |      |
| <b>Path <math>S_0^*</math>-17</b>                                             | Root1( $S_0$ ) | -817.92637 | -817.94391 | -820.45400 | 38.6 |
|                                                                               | Root2          |            | -817.81278 |            |      |
|                                                                               | Root3          |            | -817.78314 |            |      |
|                                                                               | Root4          |            | -817.75572 |            |      |
|                                                                               | Root5          |            | -817.70125 |            |      |
| <b>Path <math>S_0^*</math>-18</b>                                             | Root1( $S_0$ ) | -817.94490 | -817.95647 | -820.46651 | 30.7 |
|                                                                               | Root2          |            | -817.79923 |            |      |
|                                                                               | Root3          |            | -817.74839 |            |      |
|                                                                               | Root4          |            | -817.72396 |            |      |
|                                                                               | Root5          |            | -817.68184 |            |      |
| <b>Path <math>S_0^*</math>-19</b>                                             | Root1( $S_0$ ) | -817.97556 | -817.97995 | -820.48966 | 16.2 |
|                                                                               | Root2          |            | -817.77742 |            |      |
|                                                                               | Root3          |            | -817.72970 |            |      |
|                                                                               | Root4          |            | -817.67859 |            |      |
|                                                                               | Root5          |            | -817.67201 |            |      |
| <b>Path <math>S_0^*</math>-20</b>                                             | Root1( $S_0$ ) | -818.00249 | -818.00576 | -820.51002 | 3.4  |
|                                                                               | Root2          |            | -817.79697 |            |      |
|                                                                               | Root3          |            | -817.74271 |            |      |
|                                                                               | Root4          |            | -817.69808 |            |      |
|                                                                               | Root5          |            | -817.68592 |            |      |
| <b>Path <math>S_0^*</math>-21</b>                                             | Root1( $S_0$ ) | -818.05348 | -818.03827 | -820.52421 | -5.5 |
|                                                                               | Root2          |            | -817.84440 |            |      |
|                                                                               | Root3          |            | -817.82680 |            |      |
|                                                                               | Root4          |            | -817.76402 |            |      |
|                                                                               | Root5          |            | -817.74449 |            |      |

|                               |                        |            |            |            |       |
|-------------------------------|------------------------|------------|------------|------------|-------|
| <b>Path S<sub>0</sub>*-22</b> | Root1(S <sub>0</sub> ) | -818.04882 | -818.05270 | -820.55030 | -21.9 |
|                               | Root2                  |            | -817.84266 |            |       |
|                               | Root3                  |            | -817.78160 |            |       |
|                               | Root4                  |            | -817.74481 |            |       |
|                               | Root5                  |            | -817.72311 |            |       |
| <b>cis-P</b>                  | Root1(S <sub>0</sub> ) | -818.05619 | -818.06370 | -820.56019 | -28.1 |
|                               | Root2                  |            | -817.85358 |            |       |
|                               | Root3                  |            | -817.79208 |            |       |
|                               | Root4                  |            | -817.75694 |            |       |
|                               | Root5                  |            | -817.73287 |            |       |

**Table S6.** Absolute energies (A.E., Hartree), relative energies (R.E., kcal/mol) for the optimized structures of **2-BF<sub>3</sub>** along the 6 $\pi$  photocyclization reaction pathway in the singlet excited state, and the subsequent [1,4]-H shift in ground state obtained by CASPT2//CASSCF(8e/8o)/PCM/6-31G\*\* calculations. The corresponding energy profiles are plotted in Figure 2a of the main article.

| <b>2-BF<sub>3</sub></b>      |                                                    | <b>CASSCF</b> | <b>RASSCF</b> | <b>CASPT2</b> |             |
|------------------------------|----------------------------------------------------|---------------|---------------|---------------|-------------|
|                              |                                                    | <b>A.E.</b>   | <b>A.E.</b>   | <b>A.E.</b>   | <b>R.E.</b> |
| <b>S<sub>0</sub>-Min</b>     | Root1(S <sub>0</sub> )                             | -1141.28066   | -1141.25925   | -1144.31818   | 0.0         |
|                              | Root2                                              |               | -1141.03046   | -1144.16427   |             |
|                              | Root3[S <sub>CT</sub> ( <sup>1</sup> $\pi\pi^*$ )] |               | -1141.02668   | -1144.18463   | 83.8        |
|                              | Root4[S <sub>NP</sub> ( <sup>1</sup> $n\pi^*$ )]   |               | -1141.01514   | -1144.14237   | 110.3       |
|                              | Root5                                              |               | -1140.99914   | -1144.16713   |             |
|                              | Root1[T <sub>PP</sub> ( <sup>3</sup> $\pi\pi^*$ )] |               | -1141.13320   | -1144.21331   | 65.8        |
|                              | Root2                                              |               | -1141.09912   |               |             |
|                              | Root3                                              |               | -1141.05639   |               |             |
|                              | Root4                                              |               | -1141.04943   |               |             |
|                              | Root5                                              |               | -1141.01332   |               |             |
| <b>Path S<sub>CT</sub>-1</b> | Root1(S <sub>0</sub> )                             |               | -1141.25658   | -1144.31183   | 4.0         |
|                              | Root2                                              |               | -1141.03922   |               |             |
|                              | Root3[S <sub>CT</sub> ( <sup>1</sup> $\pi\pi^*$ )] | -1141.05923   | -1141.02845   | -1144.19088   | 79.9        |
|                              | Root4                                              |               | -1141.01372   |               |             |
|                              | Root5                                              |               | -1140.99821   |               |             |
| <b>Path S<sub>CT</sub>-2</b> | Root1(S <sub>0</sub> )                             |               | -1141.24461   | -1144.31223   | 3.7         |
|                              | Root2[S <sub>CT</sub> ( <sup>1</sup> $\pi\pi^*$ )] | -1141.06900   | -1141.04653   | -1144.20074   | 73.7        |
|                              | Root3                                              |               | -1141.02402   |               |             |
|                              | Root4                                              |               | -1141.01030   |               |             |

|                               |                                            |             |             |             |      |
|-------------------------------|--------------------------------------------|-------------|-------------|-------------|------|
|                               | Root5                                      |             | -1141.00201 |             |      |
| <b>Path S<sub>CT</sub>-3</b>  | Root1(S <sub>0</sub> )                     |             | -1141.24830 | -1144.30930 | 5.6  |
|                               | Root2[S <sub>CT</sub> ( <sup>1</sup> ππ*)] | -1141.07392 | -1141.05857 | -1144.20600 | 70.4 |
|                               | Root3                                      |             | -1141.02896 |             |      |
|                               | Root4                                      |             | -1141.01720 |             |      |
|                               | Root5                                      |             | -1141.00559 |             |      |
| <b>Path S<sub>CT</sub>-4</b>  | Root1(S <sub>0</sub> )                     |             | -1141.23879 | -1144.30482 | 8.4  |
|                               | Root2[S <sub>CT</sub> ( <sup>1</sup> ππ*)] | -1141.07842 | -1141.06210 | -1144.20676 | 69.9 |
|                               | Root3                                      |             | -1141.02394 |             |      |
|                               | Root4                                      |             | -1141.01351 |             |      |
|                               | Root5                                      |             | -1141.00211 |             |      |
| <b>Path S<sub>CT</sub>-5</b>  | Root1(S <sub>0</sub> )                     |             | -1141.23845 | -1144.30606 | 7.6  |
|                               | Root2[S <sub>CT</sub> ( <sup>1</sup> ππ*)] | -1141.08347 | -1141.06722 | -1144.20667 | 70.0 |
|                               | Root3                                      |             | -1141.02769 |             |      |
|                               | Root4                                      |             | -1141.00947 |             |      |
|                               | Root5                                      |             | -1140.99890 |             |      |
| <b>Path S<sub>CT</sub>-6</b>  | Root1(S <sub>0</sub> )                     |             | -1141.23628 | -1144.30431 | 8.7  |
|                               | Root2[S <sub>CT</sub> ( <sup>1</sup> ππ*)] | -1141.08598 | -1141.07106 | -1144.21004 | 67.9 |
|                               | Root3                                      |             | -1141.02823 |             |      |
|                               | Root4                                      |             | -1141.01002 |             |      |
|                               | Root5                                      |             | -1140.99950 |             |      |
| <b>Path S<sub>CT</sub>-7</b>  | Root1(S <sub>0</sub> )                     |             | -1141.23483 | -1144.30400 | 8.9  |
|                               | Root2[S <sub>CT</sub> ( <sup>1</sup> ππ*)] | -1141.08837 | -1141.07469 | -1144.21360 | 65.6 |
|                               | Root3                                      |             | -1141.02974 |             |      |
|                               | Root4                                      |             | -1141.01112 |             |      |
|                               | Root5                                      |             | -1140.99971 |             |      |
| <b>Path S<sub>CT</sub>-8</b>  | Root1(S <sub>0</sub> )                     |             | -1141.22401 | -1144.30468 | 8.5  |
|                               | Root2[S <sub>CT</sub> ( <sup>1</sup> ππ*)] | -1141.09562 | -1141.08192 | -1144.21789 | 62.9 |
|                               | Root3                                      |             | -1141.02760 |             |      |
|                               | Root4                                      |             | -1141.00657 |             |      |
|                               | Root5                                      |             | -1140.99125 |             |      |
| <b>Path S<sub>CT</sub>-9</b>  | Root1(S <sub>0</sub> )                     |             | -1141.22007 | -1144.29998 | 11.4 |
|                               | Root2[S <sub>CT</sub> ( <sup>1</sup> ππ*)] | -1141.09774 | -1141.08594 | -1144.22014 | 61.5 |
|                               | Root3                                      |             | -1141.03180 |             |      |
|                               | Root4                                      |             | -1141.01125 |             |      |
|                               | Root5                                      |             | -1140.99084 |             |      |
| <b>Path S<sub>CT</sub>-10</b> | Root1(S <sub>0</sub> )                     |             | -1141.20500 | -1144.29040 | 17.4 |
|                               | Root2[S <sub>CT</sub> ( <sup>1</sup> ππ*)] | -1141.09738 | -1141.08954 | -1144.21946 | 61.9 |

|                               |                                            |             |             |             |      |
|-------------------------------|--------------------------------------------|-------------|-------------|-------------|------|
|                               | Root3                                      |             | -1141.02828 |             |      |
|                               | Root4                                      |             | -1141.00897 |             |      |
|                               | Root5                                      |             | -1140.97974 |             |      |
|                               |                                            |             |             |             |      |
| <b>Path S<sub>CT</sub>-11</b> | Root1(S <sub>0</sub> )                     |             | -1141.20400 | -1144.28984 | 17.8 |
|                               | Root2[S <sub>CT</sub> ( <sup>1</sup> ππ*)] | -1141.09789 | -1141.08774 | -1144.21814 | 62.8 |
|                               | Root3                                      |             | -1141.02633 |             |      |
|                               | Root4                                      |             | -1141.00626 |             |      |
|                               | Root5                                      |             | -1140.97688 |             |      |
|                               |                                            |             |             |             |      |
| <b>Path S<sub>CT</sub>-12</b> | Root1(S <sub>0</sub> )                     |             | -1141.20259 | -1144.28887 | 18.4 |
|                               | Root2[S <sub>CT</sub> ( <sup>1</sup> ππ*)] | -1141.09562 | -1141.08645 | -1144.21730 | 63.3 |
|                               | Root3                                      |             | -1141.02414 |             |      |
|                               | Root4                                      |             | -1141.00535 |             |      |
|                               | Root5                                      |             | -1140.97466 |             |      |
|                               |                                            |             |             |             |      |
| <b>Path S<sub>CT</sub>-13</b> | Root1(S <sub>0</sub> )                     |             | -1141.19437 | -1144.28167 | 22.9 |
|                               | Root2[S <sub>CT</sub> ( <sup>1</sup> ππ*)] | -1141.09537 | -1141.09139 | -1144.21999 | 61.6 |
|                               | Root3                                      |             | -1141.02605 |             |      |
|                               | Root4                                      |             | -1141.01151 |             |      |
|                               | Root5                                      |             | -1140.97240 |             |      |
|                               |                                            |             |             |             |      |
| <b>Path S<sub>CT</sub>-14</b> | Root1(S <sub>0</sub> )                     |             | -1141.17556 | -1144.26772 | 31.7 |
|                               | Root2[S <sub>CT</sub> ( <sup>1</sup> ππ*)] | -1141.09537 | -1141.09618 | -1144.22244 | 60.1 |
|                               | Root3                                      |             | -1141.01728 |             |      |
|                               | Root4                                      |             | -1141.00608 |             |      |
|                               | Root5                                      |             | -1140.96059 |             |      |
|                               |                                            |             |             |             |      |
| <b>Path S<sub>CT</sub>-15</b> | Root1(S <sub>0</sub> )                     |             | -1141.16019 | -1144.25542 | 39.4 |
|                               | Root2[S <sub>CT</sub> ( <sup>1</sup> ππ*)] | -1141.09674 | -1141.10021 | -1144.22339 | 59.5 |
|                               | Root3                                      |             | -1141.01409 |             |      |
|                               | Root4                                      |             | -1141.00205 |             |      |
|                               | Root5                                      |             | -1140.95276 |             |      |
|                               |                                            |             |             |             |      |
| <b>Path S<sub>CT</sub>-16</b> | Root1(S <sub>0</sub> )                     |             | -1141.14511 | -1144.24332 | 47.0 |
|                               | Root2[S <sub>CT</sub> ( <sup>1</sup> ππ*)] | -1141.09809 | -1141.10238 | -1144.22503 | 58.5 |
|                               | Root3                                      |             | -1141.01185 |             |      |
|                               | Root4                                      |             | -1140.99607 |             |      |
|                               | Root5                                      |             | -1140.94660 |             |      |
|                               |                                            |             |             |             |      |
| <b>Path S<sub>CT</sub>-17</b> | Root1(S <sub>0</sub> )                     |             | -1141.14211 | -1144.24124 | 48.3 |
|                               | Root2[S <sub>CT</sub> ( <sup>1</sup> ππ*)] | -1141.09857 | -1141.10282 | -1144.22589 | 57.9 |
|                               | Root3                                      |             | -1141.01107 |             |      |
|                               | Root4                                      |             | -1140.99479 |             |      |
|                               | Root5                                      |             | -1140.94594 |             |      |
|                               |                                            |             |             |             |      |

|                                                                |                                            |             |             |             |      |
|----------------------------------------------------------------|--------------------------------------------|-------------|-------------|-------------|------|
| <b>Path S<sub>CT</sub>-18</b>                                  | Root1(S <sub>0</sub> )                     |             | -1141.13875 | -1144.23883 | 49.8 |
|                                                                | Root2[S <sub>CT</sub> ( <sup>1</sup> ππ*)] | -1141.09845 | -1141.10312 | -1144.22700 | 57.2 |
|                                                                | Root3                                      |             | -1141.00968 |             |      |
|                                                                | Root4                                      |             | -1140.99403 |             |      |
|                                                                | Root5                                      |             | -1140.94445 |             |      |
| <b>Path S<sub>CT</sub>-19</b>                                  | Root1(S <sub>0</sub> )                     |             | -1141.13808 | -1144.23839 | 50.1 |
|                                                                | Root2[S <sub>CT</sub> ( <sup>1</sup> ππ*)] | -1141.09877 | -1141.10322 | -1144.22741 | 57.0 |
|                                                                | Root3                                      |             | -1141.00938 |             |      |
|                                                                | Root4                                      |             | -1140.99407 |             |      |
|                                                                | Root5                                      |             | -1140.94400 |             |      |
| <b>Path S<sub>CT</sub>-20</b>                                  | Root1(S <sub>0</sub> )                     |             | -1141.13192 | -1144.23489 | 52.3 |
|                                                                | Root2[S <sub>CT</sub> ( <sup>1</sup> ππ*)] | -1141.09787 | -1141.09984 | -1144.23031 | 55.1 |
|                                                                | Root3                                      |             | -1141.00883 |             |      |
|                                                                | Root4                                      |             | -1140.99170 |             |      |
|                                                                | Root5                                      |             | -1140.93787 |             |      |
| <b>CI(S<sub>CT</sub>/S<sub>0</sub>)</b>                        | Root1(S <sub>0</sub> )                     |             | -1141.12840 | -1144.23948 | 49.4 |
|                                                                | Root2[S <sub>CT</sub> ( <sup>1</sup> ππ*)] | -1141.09705 | -1141.10753 | -1144.23569 | 51.8 |
|                                                                | Root3                                      |             | -1141.01302 |             |      |
|                                                                | Root4                                      |             | -1140.98971 |             |      |
|                                                                | Root5                                      |             | -1140.95138 |             |      |
| <b>Path S<sub>0</sub><sup>*</sup>-1</b>                        | Root1(S <sub>0</sub> )                     | -1141.16074 | -1141.14610 | -1144.24194 | 47.8 |
|                                                                | Root2                                      |             | -1141.04185 |             |      |
|                                                                | Root3                                      |             | -1141.01675 |             |      |
|                                                                | Root4                                      |             | -1141.00192 |             |      |
|                                                                | Root5                                      |             | -1140.96243 |             |      |
| <b>Path S<sub>0</sub><sup>*</sup>-2</b>                        | Root1(S <sub>0</sub> )                     | -1141.16913 | -1141.15129 | -1144.25226 | 41.4 |
|                                                                | Root2                                      |             | -1141.04709 |             |      |
|                                                                | Root3                                      |             | -1141.01337 |             |      |
|                                                                | Root4                                      |             | -1141.00452 |             |      |
|                                                                | Root5                                      |             | -1140.95291 |             |      |
| <b>Path S<sub>0</sub><sup>*</sup>-3</b>                        | Root1(S <sub>0</sub> )                     | -1141.17040 | -1141.15919 | -1144.26300 | 34.6 |
|                                                                | Root2                                      |             | -1141.05610 |             |      |
|                                                                | Root3                                      |             | -1140.99456 |             |      |
|                                                                | Root4                                      |             | -1140.97052 |             |      |
|                                                                | Root5                                      |             | -1140.92458 |             |      |
| <b>Path S<sub>0</sub><sup>*</sup>-4/<br/>S<sub>0</sub>-Int</b> | Root1(S <sub>0</sub> )                     | -1141.16979 | -1141.15503 | -1144.26518 | 33.3 |
|                                                                | Root2                                      |             | -1141.04217 |             |      |
|                                                                | Root3                                      |             | -1140.99228 |             |      |
|                                                                | Root4                                      |             | -1140.95668 |             |      |

|                                          |                        |                     |             |             |      |
|------------------------------------------|------------------------|---------------------|-------------|-------------|------|
|                                          | Root5                  |                     | -1140.93579 |             |      |
| <b>Path S<sub>0</sub><sup>*</sup>-5</b>  | Root1(S <sub>0</sub> ) | -1141.15916         | -1141.15438 | -1144.26130 | 35.7 |
|                                          | Root2                  |                     | -1141.03430 |             |      |
|                                          | Root3                  |                     | -1140.96994 |             |      |
|                                          | Root4                  |                     | -1140.93972 |             |      |
|                                          | Root5                  |                     | -1140.91749 |             |      |
| <b>Path S<sub>0</sub><sup>*</sup>-6</b>  | Root1(S <sub>0</sub> ) | -1141.15648         | -1141.15192 | -1144.25830 | 37.6 |
|                                          | Root2                  |                     | -1141.02932 |             |      |
|                                          | Root3                  |                     | -1140.96565 |             |      |
|                                          | Root4                  |                     | -1140.93597 |             |      |
|                                          | Root5                  |                     | -1140.91226 |             |      |
| <b>Path S<sub>0</sub><sup>*</sup>-7</b>  | Root1(S <sub>0</sub> ) | -1141.15256         | -1141.14892 | -1144.25396 | 40.3 |
|                                          | Root2                  |                     | -1141.02388 |             |      |
|                                          | Root3                  |                     | -1140.96038 |             |      |
|                                          | Root4                  |                     | -1140.93189 |             |      |
|                                          | Root5                  |                     | -1140.90505 |             |      |
| <b>Path S<sub>0</sub><sup>*</sup>-8</b>  | Root1(S <sub>0</sub> ) | -1141.14727         | -1141.14565 | -1144.24861 | 43.7 |
|                                          | Root2                  |                     | -1141.01516 |             |      |
|                                          | Root3                  |                     | -1140.95403 |             |      |
|                                          | Root4                  |                     | -1140.92719 |             |      |
|                                          | Root5                  |                     | -1140.89512 |             |      |
| <b>Path S<sub>0</sub><sup>*</sup>-9</b>  | Root1(S <sub>0</sub> ) | -<br>1141.1408<br>3 | -1141.14408 | -1144.24774 | 44.2 |
|                                          | Root2                  |                     | -1141.01026 |             |      |
|                                          | Root3                  |                     | -1140.95522 |             |      |
|                                          | Root4                  |                     | -1140.92730 |             |      |
|                                          | Root5                  |                     | -1140.88724 |             |      |
| <b>Path S<sub>0</sub><sup>*</sup>-10</b> | Root1(S <sub>0</sub> ) | -1141.13870         | -1141.14625 | -1144.25188 | 41.6 |
|                                          | Root2                  |                     | -1141.00571 |             |      |
|                                          | Root3                  |                     | -1140.96280 |             |      |
|                                          | Root4                  |                     | -1140.92333 |             |      |
|                                          | Root5                  |                     | -1140.88612 |             |      |
| <b>Path S<sub>0</sub><sup>*</sup>-11</b> | Root1(S <sub>0</sub> ) | -1141.13873         | -1141.16048 | -1144.25939 | 36.9 |
|                                          | Root2                  |                     | -1140.98804 |             |      |
|                                          | Root3                  |                     | -1140.96456 |             |      |
|                                          | Root4                  |                     | -1140.90219 |             |      |
|                                          | Root5                  |                     | -1140.89971 |             |      |

|                               |                        |             |             |             |       |
|-------------------------------|------------------------|-------------|-------------|-------------|-------|
| <b>Path S<sub>0</sub>*-12</b> | Root1(S <sub>0</sub> ) | -1141.14361 | -1141.16819 | -1144.26466 | 33.6  |
|                               | Root2                  |             | -1140.98686 |             |       |
|                               | Root3                  |             | -1140.96043 |             |       |
|                               | Root4                  |             | -1140.90399 |             |       |
|                               | Root5                  |             | -1140.89879 |             |       |
| <b>Path S<sub>0</sub>*-13</b> | Root1(S <sub>0</sub> ) | -1141.20249 | -1141.20670 | -1144.29262 | 16.0  |
|                               | Root2                  |             | -1140.97395 |             |       |
|                               | Root3                  |             | -1140.93018 |             |       |
|                               | Root4                  |             | -1140.87744 |             |       |
|                               | Root5                  |             | -1140.87294 |             |       |
| <b>Path S<sub>0</sub>*-14</b> | Root1(S <sub>0</sub> ) | -1141.22824 | -1141.22958 | -1144.31411 | 2.5   |
|                               | Root2                  |             | -1140.99519 |             |       |
|                               | Root3                  |             | -1140.95396 |             |       |
|                               | Root4                  |             | -1140.89800 |             |       |
|                               | Root5                  |             | -1140.89383 |             |       |
| <b><i>trans</i>-P</b>         | Root1(S <sub>0</sub> ) | -1141.27636 | -1141.27636 | -1144.34301 | -15.6 |
|                               | Root2                  |             | -1141.27636 |             |       |
|                               | Root3                  |             | -1141.27636 |             |       |
|                               | Root4                  |             | -1141.27636 |             |       |
|                               | Root5                  |             | -1141.27636 |             |       |
| <b><i>cis</i>-P</b>           | Root1(S <sub>0</sub> ) | -1141.28699 | -1141.28781 | -1144.36527 | -29.5 |
|                               | Root2                  |             | -1141.05282 |             |       |
|                               | Root3                  |             | -1141.01118 |             |       |
|                               | Root4                  |             | -1140.95315 |             |       |
|                               | Root5                  |             | -1140.94985 |             |       |

**Table S7.** Absolute energies (A.E., Hartree), relative energies (R.E., kcal/mol) for the optimized structures of **2-BF<sub>3</sub>** along the  $6\pi$  photocyclization reaction pathway in the triplet excited state, and the subsequent [1,4]-H shift in ground state obtained by CASPT2//CASSCF(8e/8o)/PCM/6-31G\*\* calculations. The corresponding energy profiles are plotted in Figure 2b of the main article.

| <b>2</b>                 |                                                    | <b>CASSCF</b> | <b>RASSCF</b> | <b>CASPT2</b> |             |
|--------------------------|----------------------------------------------------|---------------|---------------|---------------|-------------|
|                          |                                                    | <b>A.E.</b>   | <b>A.E.</b>   | <b>A.E.</b>   | <b>R.E.</b> |
| <b>S<sub>0</sub>-Min</b> | Root1(S <sub>0</sub> )                             | -1141.28066   | -1141.25925   | -1144.31818   | 0.0         |
|                          | Root2                                              |               | -1141.03046   | -1144.16427   |             |
|                          | Root3[S <sub>CT</sub> ( <sup>1</sup> $\pi\pi^*$ )] |               | -1141.02668   | -1144.18463   | 83.8        |
|                          | Root4[S <sub>NP</sub> ( <sup>1</sup> $n\pi^*$ )]   |               | -1141.01514   | -1144.14237   | 110.3       |
|                          | Root5                                              |               | -1140.99914   | -1144.16713   |             |



|                                   |                               |             |             |             |      |  |
|-----------------------------------|-------------------------------|-------------|-------------|-------------|------|--|
|                                   | Root1[ $T_{pp}(^3\pi\pi^*)$ ] |             | -1141.13320 | -1144.21331 | 65.8 |  |
|                                   | Root2                         |             | -1141.09912 |             |      |  |
|                                   | Root3                         |             | -1141.05639 |             |      |  |
|                                   | Root4                         |             | -1141.04943 |             |      |  |
|                                   | Root5                         |             | -1141.01332 |             |      |  |
|                                   |                               |             |             |             |      |  |
| <b>Path <math>T_{pp-1}</math></b> | Root1[ $T_{pp}(^1\pi\pi^*)$ ] | -1141.15411 | -1141.15823 | -1144.21806 | 62.8 |  |
|                                   | Root2                         |             | -1141.11876 |             |      |  |
|                                   | Root3                         |             | -1141.07225 |             |      |  |
|                                   | Root4                         |             | -1141.05985 |             |      |  |
|                                   | Root5                         |             | -1141.00505 |             |      |  |
|                                   |                               |             |             |             |      |  |
|                                   | Root1( $S_0$ )                |             | -1141.26372 | -1144.31750 | 0.4  |  |
|                                   | Root2                         |             | -1141.04607 |             |      |  |
|                                   | Root3                         |             | -1141.03454 |             |      |  |
|                                   | Root4                         |             | -1141.01119 |             |      |  |
|                                   | Root5                         |             |             |             |      |  |
|                                   |                               |             |             |             |      |  |
| <b>Path <math>T_{pp-2}</math></b> | Root1[ $T_{pp}(^1\pi\pi^*)$ ] | -1141.16229 | -1141.16715 | -1144.22620 | 57.7 |  |
|                                   | Root2                         |             | -1141.11006 |             |      |  |
|                                   | Root3                         |             | -1141.06401 |             |      |  |
|                                   | Root4                         |             | -1141.05145 |             |      |  |
|                                   | Root5                         |             | -1141.01038 |             |      |  |
|                                   |                               |             |             |             |      |  |
|                                   | Root1( $S_0$ )                |             | -1141.25906 | -1144.31782 | 0.2  |  |
|                                   | Root2                         |             | -1141.04964 |             |      |  |
|                                   | Root3                         |             | -1141.03130 |             |      |  |
|                                   | Root4                         |             | -1141.01369 |             |      |  |
|                                   | Root5                         |             | -1140.99829 |             |      |  |
|                                   |                               |             |             |             |      |  |
| <b>Path <math>T_{pp-3}</math></b> | Root1[ $T_{pp}(^1\pi\pi^*)$ ] | -1141.16708 | -1141.17365 | -1144.22983 | 55.4 |  |
|                                   | Root2                         |             | -1141.10119 |             |      |  |
|                                   | Root3                         |             | -1141.05488 |             |      |  |
|                                   | Root4                         |             | -1141.04216 |             |      |  |
|                                   | Root5                         |             | -1141.01528 |             |      |  |
|                                   |                               |             |             |             |      |  |
|                                   | Root1( $S_0$ )                |             | -1141.25472 | -1144.31556 | 1.6  |  |
|                                   | Root2                         |             | -1141.04517 |             |      |  |
|                                   | Root3                         |             | -1141.02864 |             |      |  |
|                                   | Root4                         |             | -1141.01063 |             |      |  |
|                                   | Root5                         |             | -1140.99284 |             |      |  |
|                                   |                               |             |             |             |      |  |
| <b>Path <math>T_{pp-4}</math></b> | Root1[ $T_{pp}(^1\pi\pi^*)$ ] | -1141.16783 | -1141.17432 | -1144.22974 | 55.5 |  |
|                                   | Root2                         |             | -1141.09904 |             |      |  |
|                                   | Root3                         |             | -1141.05278 |             |      |  |
|                                   | Root4                         |             | -1141.03988 |             |      |  |
|                                   |                               |             |             |             |      |  |

|                              |                                            |             |             |             |      |
|------------------------------|--------------------------------------------|-------------|-------------|-------------|------|
|                              | Root5                                      |             | -1141.01588 |             |      |
|                              | Root1(S <sub>0</sub> )                     |             | -1141.25197 | -1144.31247 | 3.6  |
|                              | Root2                                      |             | -1141.04360 |             |      |
|                              | Root3                                      |             | -1141.02672 |             |      |
|                              | Root4                                      |             | -1141.00930 |             |      |
|                              | Root5                                      |             | -1140.99295 |             |      |
| <b>Path T<sub>PP</sub>-5</b> | Root1[T <sub>PP</sub> ( <sup>1</sup> ππ*)] | -1141.16877 | -1141.17547 | -1144.23017 | 55.2 |
|                              | Root2                                      |             | -1141.09653 |             |      |
|                              | Root3                                      |             | -1141.05015 |             |      |
|                              | Root4                                      |             | -1141.03745 |             |      |
|                              | Root5                                      |             | -1141.01718 |             |      |
|                              | Root1(S <sub>0</sub> )                     |             | -1141.24860 | -1144.30871 | 5.9  |
|                              | Root2                                      |             | -1141.04554 |             |      |
|                              | Root3                                      |             | -1141.02495 |             |      |
|                              | Root4                                      |             | -1141.00797 |             |      |
|                              | Root5                                      |             | -1140.99405 |             |      |
| <b>Path T<sub>PP</sub>-6</b> | Root1[T <sub>PP</sub> ( <sup>1</sup> ππ*)] | -1141.16884 | -1141.17560 | -1144.23122 | 54.6 |
|                              | Root2                                      |             | -1141.09447 |             |      |
|                              | Root3                                      |             | -1141.04827 |             |      |
|                              | Root4                                      |             | -1141.03505 |             |      |
|                              | Root5                                      |             | -1141.01747 |             |      |
|                              | Root1(S <sub>0</sub> )                     |             | -1141.24579 | -1144.30562 | 7.9  |
|                              | Root2                                      |             | -1141.05031 |             |      |
|                              | Root3                                      |             | -1141.02374 |             |      |
|                              | Root4                                      |             | -1141.00868 |             |      |
|                              | Root5                                      |             | -1140.99420 |             |      |
| <b>Path T<sub>PP</sub>-7</b> | Root1[T <sub>PP</sub> ( <sup>1</sup> ππ*)] | -1141.16923 | -1141.17565 | -1144.23166 | 54.3 |
|                              | Root2                                      |             | -1141.09277 |             |      |
|                              | Root3                                      |             | -1141.04609 |             |      |
|                              | Root4                                      |             | -1141.03303 |             |      |
|                              | Root5                                      |             | -1141.01836 |             |      |
|                              | Root1(S <sub>0</sub> )                     |             | -1141.24282 | -1144.30592 | 7.7  |
|                              | Root2                                      |             | -1141.05304 |             |      |
|                              | Root3                                      |             | -1141.02392 |             |      |
|                              | Root4                                      |             | -1141.00755 |             |      |
|                              | Root5                                      |             | -1140.99557 |             |      |
| <b>Path T<sub>PP</sub>-8</b> | Root1[T <sub>PP</sub> ( <sup>1</sup> ππ*)] | -1141.16927 | -1141.17537 | -1144.23244 | 53.8 |
|                              | Root2                                      |             | -1141.09233 |             |      |

|                               |                                            |             |             |             |      |
|-------------------------------|--------------------------------------------|-------------|-------------|-------------|------|
|                               | Root3                                      |             | -1141.04547 |             |      |
|                               | Root4                                      |             | -1141.03273 |             |      |
|                               | Root5                                      |             | -1141.01820 |             |      |
|                               | Root1(S <sub>0</sub> )                     |             | -1141.24164 | -1144.30592 | 7.7  |
|                               | Root2                                      |             | -1141.05585 |             |      |
|                               | Root3                                      |             | -1141.02525 |             |      |
|                               | Root4                                      |             | -1141.00805 |             |      |
|                               | Root5                                      |             | -1140.99544 |             |      |
|                               |                                            |             |             |             |      |
| <b>Path T<sub>pp</sub>-9</b>  | Root1[T <sub>pp</sub> ( <sup>1</sup> ππ*)] | -1141.16901 | -1141.17453 | -1144.23329 | 53.3 |
|                               | Root2                                      |             | -1141.08288 |             |      |
|                               | Root3                                      |             | -1141.03928 |             |      |
|                               | Root4                                      |             | -1141.02959 |             |      |
|                               | Root5                                      |             | -1141.01437 |             |      |
|                               | Root1(S <sub>0</sub> )                     |             | -1141.23095 | -1144.30151 | 10.5 |
|                               | Root2                                      |             | -1141.05886 |             |      |
|                               | Root3                                      |             | -1141.02387 |             |      |
|                               | Root4                                      |             | -1141.00906 |             |      |
|                               | Root5                                      |             | -1140.99369 |             |      |
|                               |                                            |             |             |             |      |
| <b>Path T<sub>pp</sub>-10</b> | Root1[T <sub>pp</sub> ( <sup>1</sup> ππ*)] | -1141.15764 | -1141.16303 | -1144.23539 | 52.0 |
|                               | Root2                                      |             | -1141.07130 |             |      |
|                               | Root3                                      |             | -1141.02870 |             |      |
|                               | Root4                                      |             | -1141.01829 |             |      |
|                               | Root5                                      |             | -1141.00797 |             |      |
|                               | Root1(S <sub>0</sub> )                     |             | -1141.20998 | -1144.28973 | 17.8 |
|                               | Root2                                      |             | -1141.06669 |             |      |
|                               | Root3                                      |             | -1141.02419 |             |      |
|                               | Root4                                      |             | -1141.00642 |             |      |
|                               | Root5                                      |             | -1140.97610 |             |      |
|                               |                                            |             |             |             |      |
| <b>Path T<sub>pp</sub>-11</b> | Root1[T <sub>pp</sub> ( <sup>1</sup> ππ*)] | -1141.15345 | -1141.15957 | -1144.23770 | 50.5 |
|                               | Root2                                      |             | -1141.06842 |             |      |
|                               | Root3                                      |             | -1141.02839 |             |      |
|                               | Root4                                      |             | -1141.01690 |             |      |
|                               | Root5                                      |             | -1141.00015 |             |      |
|                               | Root1(S <sub>0</sub> )                     |             | -1141.20084 | -1144.28308 | 22.0 |
|                               | Root2                                      |             | -1141.07273 |             |      |
|                               | Root3                                      |             | -1141.02587 |             |      |
|                               | Root4                                      |             | -1141.00853 |             |      |
|                               | Root5                                      |             | -1140.97067 |             |      |

|                               |                                            |             |             |             |      |
|-------------------------------|--------------------------------------------|-------------|-------------|-------------|------|
| <b>Path T<sub>pp</sub>-12</b> | Root1[T <sub>pp</sub> ( <sup>1</sup> ππ*)] | -1141.15125 | -1141.15791 | -1144.23859 | 49.9 |
|                               | Root2                                      |             | -1141.06680 |             |      |
|                               | Root3                                      |             | -1141.02865 |             |      |
|                               | Root4                                      |             | -1141.01660 |             |      |
|                               | Root5                                      |             | -1140.99528 |             |      |
|                               | Root1(S <sub>0</sub> )                     |             | -1141.19559 | -1144.27893 | 24.6 |
|                               | Root2                                      |             | -1141.07488 |             |      |
|                               | Root3                                      |             | -1141.02681 |             |      |
|                               | Root4                                      |             | -1141.00983 |             |      |
|                               | Root5                                      |             | -1140.96725 |             |      |
| <b>Path T<sub>pp</sub>-13</b> | Root1[T <sub>pp</sub> ( <sup>1</sup> ππ*)] | -1141.14871 | -1141.15598 | -1144.23927 | 49.5 |
|                               | Root2                                      |             | -1141.06419 |             |      |
|                               | Root3                                      |             | -1141.02906 |             |      |
|                               | Root4                                      |             | -1141.01594 |             |      |
|                               | Root5                                      |             | -1140.98948 |             |      |
|                               | Root1(S <sub>0</sub> )                     |             | -1141.18875 | -1144.27352 | 28.0 |
|                               | Root2                                      |             | -1141.07715 |             |      |
|                               | Root3                                      |             | -1141.02795 |             |      |
|                               | Root4                                      |             | -1141.01081 |             |      |
|                               | Root5                                      |             | -1140.96235 |             |      |
| <b>Path T<sub>pp</sub>-14</b> | Root1[T <sub>pp</sub> ( <sup>1</sup> ππ*)] | -1141.14642 | -1141.15380 | -1144.23902 | 49.7 |
|                               | Root2                                      |             | -1141.06172 |             |      |
|                               | Root3                                      |             | -1141.02925 |             |      |
|                               | Root4                                      |             | -1141.01507 |             |      |
|                               | Root5                                      |             | -1140.98293 |             |      |
|                               | Root1(S <sub>0</sub> )                     |             | -1141.18100 | -1144.26681 | 32.2 |
|                               | Root2                                      |             | -1141.07824 |             |      |
|                               | Root3                                      |             | -1141.02928 |             |      |
|                               | Root4                                      |             | -1141.01223 |             |      |
|                               | Root5                                      |             | -1140.95544 |             |      |
| <b>Path T<sub>pp</sub>-15</b> | Root1[T <sub>pp</sub> ( <sup>1</sup> ππ*)] | -1141.14504 | -1141.15156 | -1144.23787 | 50.4 |
|                               | Root2                                      |             | -1141.05615 |             |      |
|                               | Root3                                      |             | -1141.02900 |             |      |
|                               | Root4                                      |             | -1141.01098 |             |      |
|                               | Root5                                      |             | -1140.97706 |             |      |
|                               | Root1(S <sub>0</sub> )                     |             | -1141.17254 | -1144.25958 | 36.8 |
|                               | Root2                                      |             | -1141.07726 |             |      |
|                               | Root3                                      |             | -1141.02987 |             |      |
|                               | Root4                                      |             | -1141.01209 |             |      |

|                                                      |                                            |             |             |             |      |
|------------------------------------------------------|--------------------------------------------|-------------|-------------|-------------|------|
|                                                      | Root5                                      |             | -1140.94581 |             |      |
| <b>Path T<sub>pp</sub>-16/<br/>T<sub>pp</sub>-TS</b> | Root1[T <sub>pp</sub> ( <sup>1</sup> ππ*)] | -1141.14503 | -1141.15015 | -1144.23575 | 51.7 |
|                                                      | Root2                                      |             | -1141.05036 |             |      |
|                                                      | Root3                                      |             | -1141.03083 |             |      |
|                                                      | Root4                                      |             | -1141.01018 |             |      |
|                                                      | Root5                                      |             | -1140.97247 |             |      |
|                                                      | Root1(S <sub>0</sub> )                     |             | -1141.16120 | -1144.24954 | 43.1 |
|                                                      | Root2                                      |             | -1141.07680 |             |      |
|                                                      | Root3                                      |             | -1141.03290 |             |      |
|                                                      | Root4                                      |             | -1141.01101 |             |      |
|                                                      | Root5                                      |             | -1140.93400 |             |      |
| <b>Path T<sub>pp</sub>-17</b>                        | Root1[T <sub>pp</sub> ( <sup>1</sup> ππ*)] | -1141.14506 | -1141.15040 | -1144.23788 | 50.4 |
|                                                      | Root2                                      |             | -1141.04695 |             |      |
|                                                      | Root3                                      |             | -1141.02996 |             |      |
|                                                      | Root4                                      |             | -1141.00384 |             |      |
|                                                      | Root5                                      |             | -1140.97354 |             |      |
|                                                      | Root1(S <sub>0</sub> )                     |             | -1141.16234 | -1144.25177 | 41.7 |
|                                                      | Root2                                      |             | -1141.07529 |             |      |
|                                                      | Root3                                      |             | -1141.03153 |             |      |
|                                                      | Root4                                      |             | -1141.01087 |             |      |
|                                                      | Root5                                      |             | -1140.93163 |             |      |
| <b>Path T<sub>pp</sub>-18</b>                        | Root1[T <sub>pp</sub> ( <sup>1</sup> ππ*)] | -1141.14777 | -1141.15509 | -1144.24049 | 48.7 |
|                                                      | Root2                                      |             | -1141.04691 |             |      |
|                                                      | Root3                                      |             | -1141.03234 |             |      |
|                                                      | Root4                                      |             | -1141.00559 |             |      |
|                                                      | Root5                                      |             | -1140.97639 |             |      |
|                                                      | Root1(S <sub>0</sub> )                     |             | -1141.15941 | -1144.24883 | 43.5 |
|                                                      | Root2                                      |             | -1141.07419 |             |      |
|                                                      | Root3                                      |             | -1141.03828 |             |      |
|                                                      | Root4                                      |             | -1141.01247 |             |      |
|                                                      | Root5                                      |             | -1140.92270 |             |      |
| <b>Path T<sub>pp</sub>-19</b>                        | Root1[T <sub>pp</sub> ( <sup>1</sup> ππ*)] | -1141.15120 | -1141.15306 | -1144.24233 | 47.6 |
|                                                      | Root2                                      |             | -1141.04264 |             |      |
|                                                      | Root3                                      |             | -1141.02683 |             |      |
|                                                      | Root4                                      |             | -1140.99811 |             |      |
|                                                      | Root5                                      |             | -1140.97426 |             |      |
|                                                      | Root1(S <sub>0</sub> )                     |             | -1141.14553 | -1144.24673 | 44.8 |
|                                                      | Root2                                      |             | -1141.05896 |             |      |

|                                     |                               |             |             |             |      |
|-------------------------------------|-------------------------------|-------------|-------------|-------------|------|
|                                     | Root3                         |             | -1141.02862 |             |      |
|                                     | Root4                         |             | -1141.00868 |             |      |
|                                     | Root5                         |             | -1140.95560 |             |      |
|                                     |                               |             |             |             |      |
| <b>Path <math>T_{PP-20}</math></b>  | Root1[ $T_{PP}(^1\pi\pi^*)$ ] | -1141.14858 | -1141.15410 | -1144.24309 | 47.1 |
|                                     | Root2                         |             | -1141.04448 |             |      |
|                                     | Root3                         |             | -1141.03155 |             |      |
|                                     | Root4                         |             | -1141.00050 |             |      |
|                                     | Root5                         |             | -1140.97607 |             |      |
|                                     |                               |             |             |             |      |
|                                     | Root1( $S_0$ )                |             | -1141.15561 | -1144.25158 | 41.8 |
|                                     | Root2                         |             | -1141.06793 |             |      |
|                                     | Root3                         |             | -1141.03423 |             |      |
|                                     | Root4                         |             | -1141.01357 |             |      |
| Root5                               |                               | -1140.93523 |             |             |      |
|                                     |                               |             |             |             |      |
| <b>Path <math>T_{PP-21}</math></b>  | Root1[ $T_{PP}(^1\pi\pi^*)$ ] | -1141.15292 | -1141.14905 | -1144.24365 | 46.8 |
|                                     | Root2                         |             | -1141.03908 |             |      |
|                                     | Root3                         |             | -1141.02579 |             |      |
|                                     | Root4                         |             | -1140.99333 |             |      |
|                                     | Root5                         |             | -1140.97217 |             |      |
|                                     |                               |             |             |             |      |
|                                     | Root1( $S_0$ )                |             | -1141.14479 | -1144.24617 | 45.2 |
|                                     | Root2                         |             | -1141.05235 |             |      |
|                                     | Root3                         |             | -1141.02797 |             |      |
|                                     | Root4                         |             | -1141.00507 |             |      |
| Root5                               |                               | -1140.95973 |             |             |      |
|                                     |                               |             |             |             |      |
| <b>STC(<math>T_{PP}/S_0</math>)</b> | Root1[ $T_{PP}(^1\pi\pi^*)$ ] | -1141.15744 | -1141.14843 | -1144.24442 | 46.3 |
|                                     | Root2                         |             | -1141.03921 |             |      |
|                                     | Root3                         |             | -1141.01959 |             |      |
|                                     | Root4                         |             | -1140.98801 |             |      |
|                                     | Root5                         |             | -1140.97287 |             |      |
|                                     |                               |             |             |             |      |
|                                     | Root1( $S_0$ )                |             | -1141.14570 | -1144.24414 | 46.5 |
|                                     | Root2                         |             | -1141.04422 |             |      |
|                                     | Root3                         |             | -1141.02249 |             |      |
|                                     | Root4                         |             | -1141.00044 |             |      |
| Root5                               |                               | -1140.96136 |             |             |      |
|                                     |                               |             |             |             |      |
| <b>Path <math>S_0^*-1</math></b>    | Root1( $S_0$ )                | -1141.16813 | -1141.15247 | -1144.25307 | 40.9 |
|                                     | Root2                         |             | -1141.04884 |             |      |
|                                     | Root3                         |             | -1141.00717 |             |      |
|                                     | Root4                         |             | -1141.00480 |             |      |
|                                     | Root5                         |             | -1140.95087 |             |      |
|                                     |                               |             |             |             |      |

|                                         |                        |             |             |             |      |
|-----------------------------------------|------------------------|-------------|-------------|-------------|------|
| <b>Path S<sub>0</sub><sup>*</sup>-2</b> | Root1(S <sub>0</sub> ) | -1141.17139 | -1141.15459 | -1144.25624 | 38.9 |
|                                         | Root2                  |             | -1141.04944 |             |      |
|                                         | Root3                  |             | -1141.00886 |             |      |
|                                         | Root4                  |             | -1140.99832 |             |      |
|                                         | Root5                  |             | -1140.94942 |             |      |
|                                         |                        |             |             |             |      |
| <b>Path S<sub>0</sub><sup>*</sup>-3</b> | Root1(S <sub>0</sub> ) | -1141.17296 | -1141.15959 | -1144.26201 | 35.2 |
|                                         | Root2                  |             | -1141.05699 |             |      |
|                                         | Root3                  |             | -1140.99057 |             |      |
|                                         | Root4                  |             | -1140.95880 |             |      |
|                                         | Root5                  |             | -1140.91672 |             |      |
|                                         |                        |             |             |             |      |
| <b>S<sub>0</sub><sup>*</sup>-Int</b>    | Root1(S <sub>0</sub> ) | -1141.16979 | -1141.15503 | -1144.26518 | 33.3 |
|                                         | Root2                  |             | -1141.04217 |             |      |
|                                         | Root3                  |             | -1140.99228 |             |      |
|                                         | Root4                  |             | -1140.95668 |             |      |
|                                         | Root5                  |             | -1140.93579 |             |      |
|                                         |                        |             |             |             |      |
| <b>Path S<sub>0</sub><sup>*</sup>-5</b> | Root1(S <sub>0</sub> ) | -1141.15916 | -1141.15438 | -1144.26130 | 35.7 |
|                                         | Root2                  |             | -1141.03430 |             |      |
|                                         | Root3                  |             | -1140.96994 |             |      |
|                                         | Root4                  |             | -1140.93972 |             |      |
|                                         | Root5                  |             | -1140.91749 |             |      |
|                                         |                        |             |             |             |      |
| <b>Path S<sub>0</sub><sup>*</sup>-6</b> | Root1(S <sub>0</sub> ) | -1141.15648 | -1141.15192 | -1144.25830 | 37.6 |
|                                         | Root2                  |             | -1141.02932 |             |      |
|                                         | Root3                  |             | -1140.96565 |             |      |
|                                         | Root4                  |             | -1140.93597 |             |      |
|                                         | Root5                  |             | -1140.91226 |             |      |
|                                         |                        |             |             |             |      |
| <b>Path S<sub>0</sub><sup>*</sup>-7</b> | Root1(S <sub>0</sub> ) | -1141.15256 | -1141.14892 | -1144.25396 | 40.3 |
|                                         | Root2                  |             | -1141.02388 |             |      |
|                                         | Root3                  |             | -1140.96038 |             |      |
|                                         | Root4                  |             | -1140.93189 |             |      |
|                                         | Root5                  |             | -1140.90505 |             |      |
|                                         |                        |             |             |             |      |
| <b>Path S<sub>0</sub><sup>*</sup>-8</b> | Root1(S <sub>0</sub> ) | -1141.14727 | -1141.14565 | -1144.24861 | 43.7 |
|                                         | Root2                  |             | -1141.01516 |             |      |
|                                         | Root3                  |             | -1140.95403 |             |      |
|                                         | Root4                  |             | -1140.92719 |             |      |
|                                         | Root5                  |             | -1140.89512 |             |      |
|                                         |                        |             |             |             |      |
| <b>Path S<sub>0</sub><sup>*</sup>-9</b> | Root1(S <sub>0</sub> ) | -1141.14083 | -1141.14408 | -1144.24774 | 44.2 |
|                                         | Root2                  |             | -1141.01026 |             |      |
|                                         | Root3                  |             | -1140.95522 |             |      |
|                                         | Root4                  |             | -1140.92730 |             |      |
|                                         | Root5                  |             | -1140.88724 |             |      |

|                                          |                        |             |             |             |       |
|------------------------------------------|------------------------|-------------|-------------|-------------|-------|
| <b>Path S<sub>0</sub><sup>*</sup>-10</b> | Root1(S <sub>0</sub> ) | -1141.13870 | -1141.14625 | -1144.25188 | 41.6  |
|                                          | Root2                  |             | -1141.00571 |             |       |
|                                          | Root3                  |             | -1140.96280 |             |       |
|                                          | Root4                  |             | -1140.92333 |             |       |
|                                          | Root5                  |             | -1140.88612 |             |       |
| <b>Path S<sub>0</sub><sup>*</sup>-11</b> | Root1(S <sub>0</sub> ) | -1141.13873 | -1141.16048 | -1144.25939 | 36.9  |
|                                          | Root2                  |             | -1140.98804 |             |       |
|                                          | Root3                  |             | -1140.96456 |             |       |
|                                          | Root4                  |             | -1140.90219 |             |       |
|                                          | Root5                  |             | -1140.89971 |             |       |
| <b>Path S<sub>0</sub><sup>*</sup>-12</b> | Root1(S <sub>0</sub> ) | -1141.14361 | -1141.16819 | -1144.26466 | 33.6  |
|                                          | Root2                  |             | -1140.98686 |             |       |
|                                          | Root3                  |             | -1140.96043 |             |       |
|                                          | Root4                  |             | -1140.90399 |             |       |
|                                          | Root5                  |             | -1140.89879 |             |       |
| <b>Path S<sub>0</sub><sup>*</sup>-13</b> | Root1(S <sub>0</sub> ) | -1141.20249 | -1141.20670 | -1144.29262 | 16.0  |
|                                          | Root2                  |             | -1140.97395 |             |       |
|                                          | Root3                  |             | -1140.93018 |             |       |
|                                          | Root4                  |             | -1140.87744 |             |       |
|                                          | Root5                  |             | -1140.87294 |             |       |
| <b>Path S<sub>0</sub><sup>*</sup>-14</b> | Root1(S <sub>0</sub> ) | -1141.22824 | -1141.22958 | -1144.31411 | 2.5   |
|                                          | Root2                  |             | -1140.99519 |             |       |
|                                          | Root3                  |             | -1140.95396 |             |       |
|                                          | Root4                  |             | -1140.89800 |             |       |
|                                          | Root5                  |             | -1140.89383 |             |       |
| <b>trans-P</b>                           | Root1(S <sub>0</sub> ) | -1141.27636 | -1141.27636 | -1144.34301 | -15.6 |
|                                          | Root2                  |             | -1141.27636 |             |       |
|                                          | Root3                  |             | -1141.27636 |             |       |
|                                          | Root4                  |             | -1141.27636 |             |       |
|                                          | Root5                  |             | -1141.27636 |             |       |
| <b>cis-P</b>                             | Root1(S <sub>0</sub> ) | -1141.28699 | -1141.28781 | -1144.36527 | -29.5 |
|                                          | Root2                  |             | -1141.05282 |             |       |
|                                          | Root3                  |             | -1141.01118 |             |       |
|                                          | Root4                  |             | -1140.95315 |             |       |
|                                          | Root5                  |             | -1140.94985 |             |       |



## 10. Cartesian Coordinates

### 10.1 Critical Structures of Free 2 in Figure 1, Figure S7, Figure S8 and Figure S9.

#### S<sub>0</sub>-Min (2)

|   |             |             |             |
|---|-------------|-------------|-------------|
| C | -3.87121616 | -1.71859881 | 0.15124013  |
| C | -3.50882094 | -1.04792546 | -1.01065094 |
| C | -2.35261141 | -0.27107411 | -1.03972018 |
| C | -1.56891331 | -0.15830530 | 0.10853601  |
| C | -1.93690190 | -0.82419089 | 1.27571991  |
| C | -3.08935429 | -1.60958663 | 1.28831927  |
| C | 1.18380243  | -1.01738285 | -0.79788651 |
| C | 0.90018453  | -0.07179273 | 0.11815568  |
| C | 1.80156435  | 0.20193479  | 1.30059799  |
| C | 3.24337485  | -0.21168726 | 1.00952821  |
| C | 3.30891203  | -1.64403682 | 0.47777188  |
| C | 2.41001101  | -1.84790837 | -0.72210843 |
| H | -3.37067841 | -2.12612326 | 2.19160356  |
| H | -4.76355652 | -2.32343764 | 0.16670468  |
| H | -4.11611428 | -1.13102424 | -1.89717228 |
| H | -2.06403312 | 0.24445088  | -1.94083417 |
| H | -1.33316640 | -0.72867570 | 2.16285404  |
| H | 1.41377997  | -0.35622686 | 2.15252940  |
| H | 1.75654703  | 1.25025998  | 1.56527466  |
| H | 3.84215707  | -0.11929436 | 1.90997618  |
| H | 3.66749446  | 0.46660527  | 0.27283622  |
| H | 4.31574012  | -1.93324190 | 0.19956456  |
| H | 2.97006331  | -2.34040268 | 1.24539474  |
| H | 0.52207128  | -1.22573755 | -1.62108400 |
| O | 2.65146626  | -2.66325720 | -1.57303609 |
| N | -0.35505776 | 0.60990315  | 0.08469220  |
| C | -0.43343161 | 1.96754399  | -0.05622285 |
| O | -1.45426447 | 2.59661470  | -0.00325083 |
| O | 0.74733495  | 2.49140506  | -0.32875383 |
| C | 0.82893068  | 3.90403309  | -0.47373249 |
| H | 1.86765487  | 4.11649055  | -0.67483362 |
| H | 0.51503220  | 4.39806461  | 0.43516956  |
| H | 0.21293728  | 4.23473468  | -1.29778909 |

#### S<sub>CT</sub>-Min (2)

|   |             |             |             |
|---|-------------|-------------|-------------|
| C | 3.47475561  | 1.95340478  | 0.20487009  |
| C | 3.66446387  | 0.75096959  | -0.52402601 |
| C | 2.65481519  | -0.16948588 | -0.62131114 |
| C | 1.38756533  | 0.09701906  | 0.01623614  |
| C | 1.21830611  | 1.33809506  | 0.73356402  |
| C | 2.25542676  | 2.22455493  | 0.82821914  |
| C | -1.08292337 | 1.11119958  | -0.73204736 |
| C | -1.00410309 | -0.19246075 | -0.12436351 |
| C | -1.89333826 | -0.53508084 | 1.03518756  |
| C | -3.24590346 | 0.15480044  | 0.87002448  |
| C | -3.06838730 | 1.66098558  | 0.68742997  |
| C | -2.09430627 | 2.02587475  | -0.42908283 |
| H | 2.12155474  | 3.13987854  | 1.38260490  |
| H | 4.28389014  | 2.66978650  | 0.27359071  |
| H | 4.60181205  | 0.57132425  | -1.02683565 |
| H | 2.78313511  | -1.06393760 | -1.20200466 |
| H | 0.27931947  | 1.54062453  | 1.20983540  |
| H | -1.44042832 | -0.19778368 | 1.96922894  |
| H | -2.02088643 | -1.60788640 | 1.12309132  |
| H | -3.87532297 | -0.05045443 | 1.73047077  |
| H | -3.74764892 | -0.25553412 | -0.00214849 |
| H | -4.01339455 | 2.13967926  | 0.45809419  |
| H | -2.70559366 | 2.11271921  | 1.60965649  |
| H | -0.46599969 | 1.33335923  | -1.57390372 |
| O | -2.22732689 | 3.13319565  | -0.96395033 |
| N | 0.32483257  | -0.75536934 | -0.09365374 |
| C | 0.52632378  | -2.13930481 | -0.19559964 |
| O | 1.58312720  | -2.65644117 | 0.00796205  |
| O | -0.56482492 | -2.76130699 | -0.53036018 |
| C | -0.51508812 | -4.18284072 | -0.63942746 |
| H | -1.51996876 | -4.48172246 | -0.89059513 |
| H | -0.21214188 | -4.61999605 | 0.30042333  |

|                              |             |             |             |
|------------------------------|-------------|-------------|-------------|
| H                            | 0.17154066  | -4.47056272 | -1.42195966 |
| <b>S<sub>CT</sub>-TS (2)</b> |             |             |             |
| C                            | 3.32433509  | 2.04589301  | 0.09165674  |
| C                            | 3.57895196  | 0.81520810  | -0.62922004 |
| C                            | 2.63181338  | -0.17765352 | -0.63401743 |
| C                            | 1.44324794  | -0.00920387 | 0.10478124  |
| C                            | 1.10598972  | 1.28852266  | 0.73437930  |
| C                            | 2.16242036  | 2.28080303  | 0.73735060  |
| C                            | -0.86482736 | 1.20324167  | -0.62047330 |
| C                            | -0.90272711 | -0.20051887 | -0.06210780 |
| C                            | -1.95973020 | -0.56896081 | 0.94794094  |
| C                            | -3.25363191 | 0.21605706  | 0.75303699  |
| C                            | -2.98717047 | 1.72113810  | 0.67590870  |
| C                            | -1.95832961 | 2.10619082  | -0.37820090 |
| H                            | 2.02814168  | 3.18280670  | 1.30903968  |
| H                            | 4.11228807  | 2.78630593  | 0.11163103  |
| H                            | 4.50767515  | 0.68372164  | -1.15369270 |
| H                            | 2.79491169  | -1.08906830 | -1.17691587 |
| H                            | 0.39147411  | 1.31141577  | 1.53713779  |
| H                            | -1.54630150 | -0.32263007 | 1.92948681  |
| H                            | -2.14837822 | -1.63503285 | 0.95587084  |
| H                            | -3.92702918 | 0.00345321  | 1.57874020  |
| H                            | -3.75325252 | -0.11617511 | -0.15306975 |
| H                            | -3.89554764 | 2.26586130  | 0.44917436  |
| H                            | -2.62664575 | 2.08689787  | 1.63673672  |
| H                            | -0.35393837 | 1.32639480  | -1.55776445 |
| O                            | -2.07968399 | 3.16423800  | -0.96659562 |
| N                            | 0.33828374  | -0.83643736 | 0.03153598  |
| C                            | 0.51391162  | -2.20763005 | -0.05991250 |
| O                            | 1.54380142  | -2.74874378 | 0.20383936  |
| O                            | -0.55967591 | -2.81636426 | -0.49205061 |
| C                            | -0.49782358 | -4.23467448 | -0.60230802 |
| H                            | -1.47718486 | -4.53579164 | -0.93625733 |
| H                            | -0.26983019 | -4.67327030 | 0.35788774  |
| H                            | 0.25350410  | -4.51878843 | -1.32495970 |

|                                             |             |             |             |
|---------------------------------------------|-------------|-------------|-------------|
| <b>CI(S<sub>CT</sub>/S<sub>0</sub>) (2)</b> |             |             |             |
| C                                           | 2.41825185  | -2.82543274 | -0.16858100 |
| C                                           | 1.20401229  | -3.25033920 | -0.79123469 |
| C                                           | 0.06527565  | -2.51851945 | -0.54441715 |
| C                                           | 0.07123532  | -1.46006725 | 0.35388268  |
| C                                           | 1.32436159  | -0.84992294 | 0.82424490  |
| C                                           | 2.49748907  | -1.71612389 | 0.62354337  |
| C                                           | 1.22762506  | 0.55924495  | -0.29559191 |
| C                                           | -0.23511795 | 0.77079445  | -0.17773450 |
| C                                           | -0.87090831 | 2.14701932  | -0.25277835 |
| C                                           | 0.18480645  | 3.26799894  | -0.29843693 |
| C                                           | 1.43638314  | 2.95050746  | 0.53278763  |
| C                                           | 2.10983520  | 1.73219733  | -0.06161679 |
| H                                           | 3.43156111  | -1.44675695 | 1.07593467  |
| H                                           | 3.30496735  | -3.42549695 | -0.28923582 |
| H                                           | 1.17651029  | -4.12914911 | -1.39794022 |
| H                                           | -0.85819677 | -2.78131325 | -1.03591267 |
| H                                           | 1.27682596  | -0.35502555 | 1.79141503  |
| H                                           | -1.54142444 | 2.28681980  | 0.58883299  |
| H                                           | -1.48594880 | 2.18339429  | -1.14736884 |
| H                                           | -0.27322367 | 4.19299886  | 0.03545278  |
| H                                           | 0.49477188  | 3.43216728  | -1.32735329 |
| H                                           | 2.13849389  | 3.77397608  | 0.52345882  |
| H                                           | 1.16570691  | 2.74325610  | 1.56746967  |
| H                                           | 1.49378440  | 0.00862456  | -1.19091382 |
| O                                           | 3.26899991  | 1.71843003  | -0.36145691 |
| N                                           | -0.85034198 | -0.35016523 | 0.12544894  |
| C                                           | -2.26145769 | -0.56593978 | 0.30171360  |
| O                                           | -2.67590917 | -1.44947424 | 0.96041688  |
| O                                           | -2.95936202 | 0.31354744  | -0.35856713 |
| C                                           | -4.38327319 | 0.21124426  | -0.25714628 |
| H                                           | -4.77209260 | 1.01023022  | -0.86695139 |
| H                                           | -4.69200458 | 0.32980297  | 0.77123583  |
| H                                           | -4.70827777 | -0.74836627 | -0.63121651 |

|                                               |             |            |            |
|-----------------------------------------------|-------------|------------|------------|
| <b>STC(S<sub>NP</sub>/T<sub>PP</sub>) (2)</b> |             |            |            |
| C                                             | -1.58622525 | 3.67346183 | 0.72559066 |

|   |             |             |             |
|---|-------------|-------------|-------------|
| C | -0.86818234 | 3.53392145  | -0.45167227 |
| C | -0.09471123 | 2.40222132  | -0.67087827 |
| C | -0.03143278 | 1.40569230  | 0.30637138  |
| C | -0.74484891 | 1.54619159  | 1.49081766  |
| C | -1.52841945 | 2.68460864  | 1.69481226  |
| C | -0.93056390 | -1.04881574 | -1.17554010 |
| C | 0.05747560  | -1.01171846 | -0.16429544 |
| C | 0.16854991  | -2.11457062 | 0.85663176  |
| C | -0.52657640 | -3.39568224 | 0.38902793  |
| C | -1.92349383 | -3.11477637 | -0.16440042 |
| C | -1.83228605 | -2.03334062 | -1.20505022 |
| H | -2.08079375 | 2.78805484  | 2.61386596  |
| H | -2.18690241 | 4.55382745  | 0.88375101  |
| H | -0.91466566 | 4.30573657  | -1.20193395 |
| H | 0.46386805  | 2.28280623  | -1.58389590 |
| H | -0.69184590 | 0.78248082  | 2.24807849  |
| H | -0.25412817 | -1.77040000 | 1.80082576  |
| H | 1.21270934  | -2.33016883 | 1.04824348  |
| H | -0.58308205 | -4.10240129 | 1.21064432  |
| H | 0.07052684  | -3.85733531 | -0.39276553 |
| H | -2.35812640 | -4.01163067 | -0.59421458 |
| H | -2.58654541 | -2.78300550 | 0.63395201  |
| H | -0.93631649 | -0.28241184 | -1.92880069 |
| O | -2.76547430 | -2.14402054 | -2.18288682 |
| N | 0.74053684  | 0.21725354  | 0.07251579  |
| C | 2.09835551  | 0.32230188  | 0.08472374  |
| O | 2.69385685  | 1.32975009  | 0.35117043  |
| O | 2.69609852  | -0.79493354 | -0.28549798 |
| C | 4.11655766  | -0.79520721 | -0.29340156 |
| H | 4.40378092  | -1.78615287 | -0.60879870 |
| H | 4.50003124  | -0.59016941 | 0.69591688  |
| H | 4.49076004  | -0.05693742 | -0.98780271 |

**T<sub>PP</sub>-Min (2)**

|   |             |            |             |
|---|-------------|------------|-------------|
| C | -1.81689785 | 3.42393023 | 0.40136660  |
| C | -0.71414638 | 3.50494306 | -0.44422565 |
| C | 0.16019227  | 2.44609719 | -0.55960502 |

|   |             |             |             |
|---|-------------|-------------|-------------|
| C | -0.03819573 | 1.28946128  | 0.19861392  |
| C | -1.11987488 | 1.21311137  | 1.07125995  |
| C | -2.02021200 | 2.27628640  | 1.15974046  |
| C | -1.02902679 | -0.96611979 | -1.20759782 |
| C | 0.25730758  | -1.08246325 | -0.45115096 |
| C | 0.46862480  | -2.34346092 | 0.36782215  |
| C | -0.72480790 | -3.30335396 | 0.27201332  |
| C | -2.06219429 | -2.56910475 | 0.43387786  |
| C | -2.25772045 | -1.58506084 | -0.70241894 |
| H | -2.87058724 | 2.20182363  | 1.81695951  |
| H | -2.50939972 | 4.24685430  | 0.46753054  |
| H | -0.54657017 | 4.39662873  | -1.02620232 |
| H | 1.00261418  | 2.50858836  | -1.22605445 |
| H | -1.26101874 | 0.33616284  | 1.67812817  |
| H | 0.60674184  | -2.04713577 | 1.40590391  |
| H | 1.37829086  | -2.85098818 | 0.06810542  |
| H | -0.62859591 | -4.07186944 | 1.03186261  |
| H | -0.71412215 | -3.81265045 | -0.68898441 |
| H | -2.90377865 | -3.25201594 | 0.43409153  |
| H | -2.08160810 | -2.02792135 | 1.37907287  |
| H | -1.04365076 | -0.54891425 | -2.20142436 |
| O | -3.32877891 | -1.38330932 | -1.21306036 |
| N | 0.81204845  | 0.14858755  | 0.02379154  |
| C | 2.16196368  | 0.30283072  | 0.16535183  |
| O | 2.69129281  | 1.28887377  | 0.59499017  |
| O | 2.82646449  | -0.76386527 | -0.23516233 |
| C | 4.24408475  | -0.72133251 | -0.14976224 |
| H | 4.58314608  | -1.67876027 | -0.51395237 |
| H | 4.55908518  | -0.57435477 | 0.87302731  |
| H | 4.63487678  | 0.07318654  | -0.76943944 |

**T<sub>PP</sub>-TS (2)**

|   |             |            |             |
|---|-------------|------------|-------------|
| C | -2.04573472 | 3.14145008 | 0.13905093  |
| C | -0.78590398 | 3.49322496 | -0.35514136 |
| C | 0.26824231  | 2.57733050 | -0.33733819 |
| C | 0.07551064  | 1.33523001 | 0.20855473  |
| C | -1.18730586 | 0.95294703 | 0.73319154  |

|   |             |             |             |
|---|-------------|-------------|-------------|
| C | -2.24142563 | 1.88850161  | 0.70545273  |
| C | -1.15596660 | -0.59287744 | -0.73838548 |
| C | 0.24411118  | -0.95307097 | -0.31972054 |
| C | 0.48060822  | -2.24400793 | 0.43308204  |
| C | -0.65699333 | -3.24607597 | 0.22016561  |
| C | -2.02342144 | -2.61772898 | 0.51311095  |
| C | -2.29259504 | -1.46543769 | -0.42929939 |
| H | -3.19096571 | 1.62488889  | 1.14022449  |
| H | -2.85230515 | 3.85509727  | 0.11161746  |
| H | -0.62583243 | 4.47097342  | -0.77726411 |
| H | 1.21374443  | 2.84239653  | -0.77178849 |
| H | -1.22725569 | 0.16234045  | 1.45866021  |
| H | 0.56383330  | -2.01510142 | 1.49619446  |
| H | 1.42314721  | -2.68644229 | 0.13695911  |
| H | -0.50157487 | -4.10647039 | 0.86256175  |
| H | -0.64125623 | -3.61260450 | -0.80405538 |
| H | -2.83186041 | -3.33194182 | 0.41261192  |
| H | -2.04409554 | -2.24139349 | 1.53624140  |
| H | -1.26837661 | -0.01025792 | -1.63864222 |
| O | -3.38192562 | -1.26713484 | -0.90748270 |
| N | 0.94864821  | 0.23100120  | 0.06531808  |
| C | 2.30928731  | 0.35104124  | 0.08966225  |
| O | 2.89398809  | 1.33492259  | 0.44541541  |
| O | 2.91046493  | -0.74647702 | -0.31936180 |
| C | 4.33224744  | -0.75652688 | -0.28352673 |
| H | 4.62290637  | -1.73130677 | -0.64277504 |
| H | 4.68523257  | -0.60707612 | 0.72682323  |
| H | 4.72993909  | 0.01540644  | -0.92631709 |

**T<sub>PP</sub>-TS<sup>dis</sup> (2 in Figure S7a)**

|   |            |             |             |
|---|------------|-------------|-------------|
| C | 2.66311452 | -2.36872074 | 0.20743786  |
| C | 2.36291229 | -1.73004480 | -0.93823985 |
| C | 1.05775863 | -1.12383120 | -1.12302751 |
| C | 0.11086714 | -1.26559135 | -0.05302663 |
| C | 0.46050694 | -1.87294338 | 1.15023962  |
| C | 1.71352400 | -2.46962793 | 1.27580647  |
| C | 0.88183633 | 0.95494682  | -1.08358786 |

|   |             |             |             |
|---|-------------|-------------|-------------|
| C | -0.50271271 | 0.98696574  | -0.49299789 |
| C | -0.87674726 | 2.11418320  | 0.45843861  |
| C | 0.32479858  | 3.00406565  | 0.81346980  |
| C | 1.59236489  | 2.16682003  | 1.03666637  |
| C | 2.00208016  | 1.55161013  | -0.28524273 |
| H | 1.97870669  | -2.98024794 | 2.18306614  |
| H | 3.63023037  | -2.82514403 | 0.33094053  |
| H | 3.07829142  | -1.66957276 | -1.73869600 |
| H | 0.65848385  | -1.10436995 | -2.12246848 |
| H | -0.23942017 | -1.88739058 | 1.96567216  |
| H | -1.27814675 | 1.67234162  | 1.36452530  |
| H | -1.67049594 | 2.71812935  | 0.03014121  |
| H | 0.09390917  | 3.58565771  | 1.69950495  |
| H | 0.51248437  | 3.71777055  | 0.01461068  |
| H | 2.41766083  | 2.75990578  | 1.40986845  |
| H | 1.39169382  | 1.37389355  | 1.75519945  |
| H | 0.95578566  | 1.20026877  | -2.13285664 |
| O | 3.12703397  | 1.55947966  | -0.69273347 |
| N | -0.96040211 | -0.34067197 | -0.18214169 |
| C | -2.26426548 | -0.71562366 | -0.08356323 |
| O | -2.62863281 | -1.82501351 | 0.19110741  |
| O | -3.08127364 | 0.29157195  | -0.32989206 |
| C | -4.47240746 | 0.04034930  | -0.24222764 |
| H | -4.95523141 | 0.97819377  | -0.46905580 |
| H | -4.74030505 | -0.28483015 | 0.75332117  |
| H | -4.76963584 | -0.71355358 | -0.95750862 |

**S<sub>0</sub>-TS<sup>C-C</sup> (2 in Figure S9a)**

|   |             |             |             |
|---|-------------|-------------|-------------|
| C | 1.96374383  | 3.21169598  | -0.08632902 |
| C | 0.65487028  | 3.60707793  | 0.10247289  |
| C | -0.42829082 | 2.62302336  | 0.05429136  |
| C | -0.15480305 | 1.36334819  | -0.26006996 |
| C | 1.21634789  | 0.89882081  | -0.58575036 |
| C | 2.26415497  | 1.88956007  | -0.46693759 |
| C | 1.12190674  | -0.48883256 | 0.63559286  |
| C | -0.18733005 | -0.95557563 | 0.19722322  |
| C | -0.28698514 | -2.11948503 | -0.75750010 |

|   |             |             |             |
|---|-------------|-------------|-------------|
| C | 0.76993516  | -3.17768518 | -0.44184065 |
| C | 2.17569117  | -2.57321210 | -0.44436577 |
| C | 2.29529617  | -1.42583064 | 0.53387527  |
| H | 3.27091854  | 1.60950446  | -0.71377676 |
| H | 2.75947626  | 3.93005099  | -0.00633443 |
| H | 0.41665720  | 4.62063156  | 0.36232265  |
| H | -1.41518594 | 2.92252456  | 0.34122747  |
| H | 1.27778214  | 0.31586419  | -1.49577592 |
| H | -0.16003278 | -1.75861241 | -1.77838877 |
| H | -1.27613081 | -2.55152038 | -0.69597337 |
| H | 0.71635576  | -3.97808768 | -1.17077074 |
| H | 0.56417530  | -3.62112585 | 0.52871819  |
| H | 2.93851989  | -3.30243297 | -0.20570933 |
| H | 2.39774215  | -2.17835995 | -1.43462323 |
| H | 1.12822364  | 0.05029516  | 1.57039602  |
| O | 3.27175431  | -1.24761162 | 1.19822638  |
| N | -0.98481315 | 0.21190917  | -0.08560632 |
| C | -2.34152233 | 0.26451729  | -0.00686765 |
| O | -3.00092336 | 1.23805136  | -0.22717672 |
| O | -2.85475945 | -0.89883073 | 0.34292527  |
| C | -4.26545875 | -0.98537921 | 0.42953833  |
| H | -4.47781459 | -2.00047447 | 0.72330647  |
| H | -4.71826742 | -0.77141296 | -0.52622332 |
| H | -4.64263567 | -0.29534012 | 1.16905273  |

**STC(T<sub>PP</sub>/S<sub>0</sub>) (2)**

|   |             |             |             |
|---|-------------|-------------|-------------|
| C | -2.00428015 | 3.18238481  | 0.10014612  |
| C | -0.69851456 | 3.58525324  | -0.24168956 |
| C | 0.38359297  | 2.61396058  | -0.25445213 |
| C | 0.14038429  | 1.36284395  | 0.11475253  |
| C | -1.21553273 | 0.83828711  | 0.49183207  |
| C | -2.29572393 | 1.87455772  | 0.42547366  |
| C | -1.22728714 | -0.41095473 | -0.50764405 |
| C | 0.18435723  | -0.93670314 | -0.30485965 |
| C | 0.42974417  | -2.21674726 | 0.45696402  |
| C | -0.70089541 | -3.22441768 | 0.24770641  |
| C | -2.06939113 | -2.61106562 | 0.56309857  |

|   |             |             |             |
|---|-------------|-------------|-------------|
| C | -2.34345564 | -1.41676930 | -0.31579464 |
| H | -3.28619703 | 1.60005504  | 0.74624654  |
| H | -2.79041143 | 3.91969267  | 0.11519083  |
| H | -0.49779191 | 4.59562421  | -0.54866116 |
| H | 1.35671441  | 2.91184687  | -0.59582958 |
| H | -1.16941950 | 0.42939071  | 1.50479085  |
| H | 0.51429069  | -1.98342146 | 1.51978406  |
| H | 1.37281162  | -2.65333494 | 0.15814227  |
| H | -0.53678081 | -4.08595480 | 0.88599859  |
| H | -0.69065703 | -3.58748187 | -0.77773633 |
| H | -2.87494386 | -3.32341467 | 0.43062379  |
| H | -2.08673801 | -2.27285493 | 1.59932724  |
| H | -1.33746268 | -0.00651997 | -1.51104328 |
| O | -3.39629176 | -1.25383681 | -0.86527865 |
| N | 0.97655397  | 0.22422741  | -0.00897245 |
| C | 2.33505895  | 0.29222273  | 0.02732128  |
| O | 2.95409965  | 1.26672478  | 0.35302365  |
| O | 2.90290065  | -0.83983574 | -0.33505199 |
| C | 4.32330089  | -0.88292800 | -0.29414793 |
| H | 4.59302488  | -1.86843104 | -0.63940693 |
| H | 4.67591590  | -0.72702747 | 0.71542940  |
| H | 4.73977853  | -0.12782343 | -0.94479252 |

**S<sub>0</sub>-Int (2)**

|   |             |             |             |
|---|-------------|-------------|-------------|
| C | -2.02373937 | 3.24978074  | -0.33964276 |
| C | -0.66381041 | 3.66108448  | -0.41925477 |
| C | 0.40136128  | 2.70005540  | -0.30680990 |
| C | 0.10563270  | 1.44265797  | 0.03624123  |
| C | -1.28314759 | 1.01909708  | 0.45067194  |
| C | -2.35279879 | 1.96267691  | -0.01293621 |
| C | -1.32126326 | -0.45133334 | -0.03529242 |
| C | 0.10806823  | -0.88086942 | 0.15599712  |
| C | 0.51795935  | -2.29877025 | -0.12465590 |
| C | -0.74573634 | -3.15177574 | -0.32674927 |
| C | -1.83535448 | -2.84309343 | 0.70399153  |
| C | -2.25238921 | -1.38545587 | 0.70384457  |
| H | -3.37697122 | 1.64030412  | 0.04870397  |

|   |             |             |             |
|---|-------------|-------------|-------------|
| H | -2.79726639 | 3.96184900  | -0.57541827 |
| H | -0.42806587 | 4.67690660  | -0.68082786 |
| H | 1.40161978  | 2.99486270  | -0.54563509 |
| H | -1.29072025 | 0.98529598  | 1.54584899  |
| H | 1.09473796  | -2.69066331 | 0.70632607  |
| H | 1.15166215  | -2.37681041 | -1.00245385 |
| H | -0.48141216 | -4.20174837 | -0.27194511 |
| H | -1.14217599 | -2.98545335 | -1.32471236 |
| H | -2.72170078 | -3.44727831 | 0.54395188  |
| H | -1.48207428 | -3.06351402 | 1.71018285  |
| H | -1.60702759 | -0.49265991 | -1.09580761 |
| O | -3.22985321 | -1.00159216 | 1.27697267  |
| N | 0.90887915  | 0.28583510  | 0.07176629  |
| C | 2.28211100  | 0.33260568  | 0.09209467  |
| O | 2.92038246  | 1.33478607  | -0.03001896 |
| O | 2.81756315  | -0.85445706 | 0.25771905  |
| C | 4.23936552  | -0.93652920 | 0.27053059  |
| H | 4.46488112  | -1.98158681 | 0.40707353  |
| H | 4.63975248  | -0.35430673 | 1.08617619  |
| H | 4.64348385  | -0.58235320 | -0.66544280 |

**S<sub>0</sub>-TS (2)**

|   |             |             |             |
|---|-------------|-------------|-------------|
| C | 1.89657517  | 3.21605583  | -0.23630869 |
| C | 0.54860715  | 3.62387836  | -0.06013642 |
| C | -0.46738725 | 2.70300699  | 0.15000567  |
| C | -0.13870260 | 1.36985660  | 0.16078614  |
| C | 1.20378622  | 0.88814172  | -0.13487452 |
| C | 2.24952036  | 1.89140863  | -0.20570942 |
| C | 1.27347887  | -0.47875843 | 0.50644043  |
| C | -0.07280983 | -0.89458355 | -0.05370392 |
| C | -0.51140357 | -2.33056288 | 0.04319276  |
| C | 0.69502237  | -3.21915472 | 0.38497390  |
| C | 1.97121402  | -2.79276044 | -0.34330850 |
| C | 2.38370168  | -1.38362417 | 0.01720727  |
| H | 3.27106745  | 1.57685127  | -0.28169876 |
| H | 2.65482839  | 3.96978090  | -0.35654293 |
| H | 0.30935018  | 4.67087707  | -0.07285284 |

|   |             |             |             |
|---|-------------|-------------|-------------|
| H | -1.47551612 | 3.02359498  | 0.30570594  |
| H | 0.82109944  | 0.23362108  | -1.21097358 |
| H | -0.95060098 | -2.64368673 | -0.89775953 |
| H | -1.27669562 | -2.46215432 | 0.79754407  |
| H | 0.46433724  | -4.24917527 | 0.13928493  |
| H | 0.87424393  | -3.18952714 | 1.45708702  |
| H | 2.80123057  | -3.45696250 | -0.13360085 |
| H | 1.81471143  | -2.80578115 | -1.42117109 |
| H | 1.30637141  | -0.47037098 | 1.60660484  |
| O | 3.51519362  | -1.00826587 | -0.06464823 |
| N | -0.91265194 | 0.22250748  | 0.18660741  |
| C | -2.29263802 | 0.26583488  | 0.11425999  |
| O | -2.93453903 | 1.21712199  | 0.43064217  |
| O | -2.80765487 | -0.85031357 | -0.33645100 |
| C | -4.23014539 | -0.90590691 | -0.40521078 |
| H | -4.45819565 | -1.89035161 | -0.77910064 |
| H | -4.59663373 | -0.14605301 | -1.07899347 |
| H | -4.65428892 | -0.76147658 | 0.57728562  |

**S<sub>0</sub>-TS' (2 in Figure S7a)**

|   |             |             |             |
|---|-------------|-------------|-------------|
| C | 3.08325803  | 2.30845190  | 0.75653524  |
| C | 1.89004160  | 2.55836845  | 0.14591814  |
| C | 0.99977079  | 1.44663489  | -0.15001073 |
| C | 1.33838182  | 0.17208771  | 0.44503273  |
| C | 2.56478908  | -0.05976934 | 1.06888915  |
| C | 3.41824714  | 0.99430978  | 1.21603351  |
| C | -0.51050761 | 1.46871202  | -0.23892497 |
| C | -0.59245740 | 0.04999060  | -0.78814180 |
| C | -1.97950561 | -0.49782137 | -1.05671167 |
| C | -3.03844988 | 0.52618090  | -0.61844372 |
| C | -2.77992824 | 1.02118915  | 0.80783861  |
| C | -1.38439137 | 1.59623889  | 0.99264796  |
| H | 4.36127770  | 0.84066611  | 1.70694464  |
| H | 3.77960073  | 3.10941087  | 0.93015941  |
| H | 1.61606492  | 3.55125936  | -0.15920263 |
| H | 0.92451881  | 0.96993757  | -1.36685287 |
| H | 2.81552651  | -1.03125059 | 1.43872803  |

|   |             |             |             |
|---|-------------|-------------|-------------|
| H | -2.14037685 | -1.41932968 | -0.51639213 |
| H | -2.10194699 | -0.73455437 | -2.10890350 |
| H | -4.02373670 | 0.07703147  | -0.67523357 |
| H | -3.04656953 | 1.36997300  | -1.30321944 |
| H | -3.50076236 | 1.77640463  | 1.10538490  |
| H | -2.87647917 | 0.20468123  | 1.52008256  |
| H | -0.84447608 | 2.19222796  | -0.97735536 |
| O | -1.03110323 | 2.08336349  | 2.02426050  |
| N | 0.34112599  | -0.67717860 | 0.01239539  |
| C | 0.52509008  | -2.05304737 | 0.01291353  |
| O | 1.19324202  | -2.62144788 | 0.81634956  |
| O | -0.10164062 | -2.64604220 | -0.97260469 |
| C | -0.00111976 | -4.06821551 | -1.01934231 |
| H | -0.59409898 | -4.36693857 | -1.86788709 |
| H | -0.39127914 | -4.49769806 | -0.10866466 |
| H | 1.02987326  | -4.36038346 | -1.15059571 |

**S<sub>0</sub>-TS1<sup>(1,2-H)</sup> (2 in Figure S8)**

|   |             |             |             |
|---|-------------|-------------|-------------|
| C | 3.04151123  | 2.29234417  | -0.74273006 |
| C | 3.67189428  | 0.97131607  | -0.69873805 |
| C | 2.92805523  | -0.15115701 | -0.35234403 |
| C | 1.63797013  | 0.02968300  | 0.14903401  |
| C | 1.11081908  | 1.40751411  | 0.50269604  |
| C | 1.83215614  | 2.50317520  | -0.24340702 |
| C | -0.36948403 | 1.23836309  | 0.25576902  |
| C | -0.68040305 | -0.20174302 | 0.08324001  |
| C | -2.01898216 | -0.70793905 | 0.54778104  |
| C | -3.08977724 | 0.32809003  | 0.18188201  |
| C | -2.81139321 | 1.70552913  | 0.78832106  |
| C | -1.38627311 | 2.20510817  | 0.63553805  |
| H | 1.35430410  | 3.46299226  | -0.29507402 |
| H | 3.57476127  | 3.09169124  | -1.22721710 |
| H | 4.68051536  | 0.85773607  | -1.04840008 |
| H | 3.32770925  | -1.13386309 | -0.49411704 |
| H | 1.25441710  | 1.58465012  | 1.57327212  |
| H | -1.99608515 | -0.84555706 | 1.62887513  |
| H | -2.25847817 | -1.65829013 | 0.10040801  |

|   |             |             |             |
|---|-------------|-------------|-------------|
| H | -4.05645731 | -0.02273000 | 0.52335304  |
| H | -3.15306224 | 0.40481803  | -0.90011707 |
| H | -3.47663927 | 2.45832919  | 0.38314103  |
| H | -2.99244023 | 1.67803913  | 1.86059314  |
| H | -0.68010005 | 0.64602105  | -0.90160107 |
| O | -1.10524208 | 3.34889926  | 0.89099507  |
| N | 0.56414704  | -0.88015707 | 0.14167701  |
| C | 0.74984406  | -2.22681117 | -0.07031401 |
| O | 1.78806914  | -2.78262421 | 0.10761401  |
| O | -0.34012303 | -2.82288622 | -0.49651704 |
| C | -0.27898302 | -4.23441133 | -0.68307205 |
| H | -1.26323410 | -4.52345335 | -1.01245808 |
| H | -0.03190300 | -4.72417136 | 0.24600702  |
| H | 0.45754804  | -4.47861534 | -1.43213211 |

**S<sub>0</sub>-TS2<sup>(1,2-H)</sup> (2 in Figure S8)**

|   |             |             |             |
|---|-------------|-------------|-------------|
| C | 3.19932781  | 2.38818312  | -0.34126207 |
| C | 3.73361717  | 1.09965159  | -0.38998762 |
| C | 2.88665722  | -0.06199931 | -0.32403868 |
| C | 1.56754258  | 0.10521555  | -0.16967620 |
| C | 0.96940328  | 1.44083749  | 0.02290858  |
| C | 1.83260963  | 2.59801905  | -0.21891984 |
| C | -0.49060316 | 1.28353495  | -0.09137575 |
| C | -0.81688122 | -0.18253226 | -0.22859456 |
| C | -1.90022805 | -0.57892895 | 0.77330813  |
| C | -3.11882389 | 0.31134513  | 0.49294013  |
| C | -2.84338376 | 1.80765569  | 0.69888873  |
| C | -1.44553618 | 2.27831232  | 0.34165638  |
| H | 1.39971633  | 3.57535627  | -0.16931847 |
| H | 3.85759339  | 3.23425114  | -0.42699365 |
| H | 4.79157267  | 0.96070501  | -0.50586057 |
| H | 3.31378203  | -1.03741310 | -0.40661135 |
| H | 0.70976296  | 1.44477662  | 1.14813806  |
| H | -1.53684193 | -0.43614071 | 1.78845931  |
| H | -2.17676257 | -1.61611154 | 0.65960799  |
| H | -3.94667896 | 0.01267525  | 1.12596326  |
| H | -3.43996079 | 0.13575851  | -0.53054918 |

|   |             |             |             |
|---|-------------|-------------|-------------|
| H | -3.55348083 | 2.41583660  | 0.14897665  |
| H | -2.96597029 | 2.07202126  | 1.74550864  |
| H | -1.19979598 | -0.36852512 | -1.23085313 |
| O | -1.13851402 | 3.43966792  | 0.47630651  |
| N | 0.51440594  | -0.83042539 | -0.11952617 |
| C | 0.71703421  | -2.16542743 | -0.30686241 |
| O | 1.78495892  | -2.70314878 | -0.28511412 |
| O | -0.41330997 | -2.80412472 | -0.54293108 |
| C | -0.33455240 | -4.20794629 | -0.75087666 |
| H | -1.34931757 | -4.53229484 | -0.91789763 |
| H | 0.07769970  | -4.69555146 | 0.11964119  |
| H | 0.27691170  | -4.42777056 | -1.61313440 |

**trans-P (2)**

|   |             |             |             |
|---|-------------|-------------|-------------|
| C | 1.93558026  | 3.30813600  | -0.00886269 |
| C | 0.60282655  | 3.68966942  | -0.04138731 |
| C | -0.43048972 | 2.74303104  | 0.02336043  |
| C | -0.08789921 | 1.41868903  | 0.11827056  |
| C | 1.25936995  | 1.01889182  | 0.17300487  |
| C | 2.27487897  | 1.95202987  | 0.10880109  |
| C | 1.27929166  | -0.47659799 | 0.36472834  |
| C | -0.07312831 | -0.89858808 | -0.22294590 |
| C | -0.47639404 | -2.31041068 | 0.20205822  |
| C | 0.78381174  | -3.17531585 | 0.41986893  |
| C | 1.96002736  | -2.76368964 | -0.47823134 |
| C | 2.38941596  | -1.33355227 | -0.19669931 |
| H | 3.30055422  | 1.63832097  | 0.14402444  |
| H | 2.71128286  | 4.05100533  | -0.06823764 |
| H | 0.34591355  | 4.73133919  | -0.12190359 |
| H | -1.45439871 | 3.05186414  | -0.00005800 |
| H | 0.03823060  | -0.87537752 | -1.32742007 |
| H | -1.09426741 | -2.74694441 | -0.57168137 |
| H | -1.07034127 | -2.29462113 | 1.10658976  |
| H | 0.54172567  | -4.21935602 | 0.25740812  |
| H | 1.10354013  | -3.09509330 | 1.45536897  |
| H | 2.81922271  | -3.40899944 | -0.33886750 |
| H | 1.68310906  | -2.82249831 | -1.53018897 |

|   |             |             |             |
|---|-------------|-------------|-------------|
| H | 1.25842061  | -0.66694398 | 1.44178045  |
| O | 3.50412359  | -0.94150400 | -0.37220981 |
| N | -0.92082578 | 0.26190993  | 0.13124792  |
| C | -2.27511152 | 0.32362194  | 0.02748718  |
| O | -2.93584463 | 1.29218468  | 0.27441547  |
| O | -2.79805180 | -0.82509494 | -0.36110913 |
| C | -4.21484497 | -0.89851627 | -0.43402324 |
| H | -4.43812158 | -1.90510120 | -0.75147549 |
| H | -4.59277767 | -0.18554367 | -1.15207418 |
| H | -4.65435285 | -0.70387470 | 0.53354277  |

**cis-P (2)**

|   |             |             |             |
|---|-------------|-------------|-------------|
| C | -1.95583146 | 3.18920896  | -0.38782307 |
| C | -0.65631027 | 3.51531129  | -0.75940415 |
| C | 0.39374168  | 2.61030679  | -0.59168121 |
| C | 0.10622163  | 1.37891061  | -0.04649952 |
| C | -1.19324532 | 1.03209596  | 0.32710604  |
| C | -2.23214139 | 1.93600707  | 0.16643754  |
| C | -1.19035373 | -0.34629950 | 0.94711869  |
| C | 0.20444226  | -0.90844625 | 0.56681922  |
| C | 0.09241490  | -1.87545659 | -0.60944383 |
| C | -0.73542579 | -3.11004721 | -0.23440307 |
| C | -1.99223793 | -2.75384189 | 0.59765101  |
| C | -2.32831331 | -1.28065159 | 0.55902133  |
| H | -3.22959409 | 1.66939471  | 0.45557773  |
| H | -2.74965145 | 3.90137267  | -0.52533248 |
| H | -0.44874298 | 4.48144851  | -1.18424225 |
| H | 1.39299525  | 2.86675444  | -0.87346058 |
| H | 0.67986830  | -1.41028337 | 1.42483506  |
| H | 1.07763958  | -2.17545420 | -0.94188026 |
| H | -0.37942400 | -1.34905283 | -1.43712028 |
| H | -0.12019328 | -3.80552849 | 0.32578456  |
| H | -1.03377948 | -3.62195534 | -1.14170579 |
| H | -2.86218852 | -3.31128130 | 0.27828943  |
| H | -1.81968465 | -2.99365204 | 1.64538236  |
| H | -1.26446213 | -0.25710003 | 2.03394586  |
| O | -3.41160861 | -0.87561414 | 0.26092018  |



|   |            |             |             |   |            |             |             |
|---|------------|-------------|-------------|---|------------|-------------|-------------|
| N | 0.97529121 | 0.29720035  | 0.22148837  | H | 4.52795650 | -1.90478423 | 0.76155924  |
| C | 2.32529520 | 0.34900698  | 0.16956060  | H | 4.71010999 | -0.19647253 | 1.19409730  |
| O | 2.97089443 | 1.31378952  | -0.12852448 | H | 4.67003477 | -0.67271914 | -0.50380174 |
| O | 2.86954789 | -0.81619559 | 0.49536888  |   |            |             |             |
| C | 4.28859283 | -0.89073063 | 0.48248333  |   |            |             |             |

## 10.2 Critical Structures of 2-BF<sub>3</sub> complex in Figure 2, Figure S7, and Figure S9.

|                                             |             |             |             |                                              |             |             |             |
|---------------------------------------------|-------------|-------------|-------------|----------------------------------------------|-------------|-------------|-------------|
| <b>S<sub>0</sub>-Min (2-BF<sub>3</sub>)</b> |             |             |             | O                                            | -0.82203000 | -2.33390801 | 0.54098000  |
| C                                           | 3.98974202  | 1.32353901  | -1.00250101 | C                                            | -0.90617901 | -3.69282302 | 0.96091101  |
| C                                           | 3.41396402  | 0.35634800  | -1.81866601 | H                                            | -1.95526701 | -3.93968402 | 0.92829900  |
| C                                           | 2.22391201  | -0.23861200 | -1.45767301 | H                                            | -0.52264900 | -3.79958002 | 1.96493401  |
| C                                           | 1.59972301  | 0.12672700  | -0.26891900 | H                                            | -0.34705700 | -4.32473302 | 0.28724200  |
| C                                           | 2.17139801  | 1.08300500  | 0.55969700  | B                                            | -3.39451902 | 3.56504502  | -2.74396101 |
| C                                           | 3.37117102  | 1.68790901  | 0.18775800  | F                                            | -4.58680302 | 2.90007802  | -2.80043901 |
| C                                           | -1.07119601 | 0.97309500  | -1.16239501 | F                                            | -3.37513601 | 4.51798402  | -1.76583701 |
| C                                           | -0.84729700 | 0.27334200  | -0.02774400 | F                                            | -2.98404001 | 4.02731702  | -3.95004602 |
| C                                           | -1.74866601 | 0.42364300  | 1.17780201  | C                                            | -3.08935429 | -1.60958663 | 1.28831927  |
| C                                           | -3.16026201 | 0.82632200  | 0.76843600  | C                                            | 1.18380243  | -1.01738285 | -0.79788651 |
| C                                           | -3.14920302 | 2.05007701  | -0.14343600 | C                                            | 0.90018453  | -0.07179273 | 0.11815568  |
| C                                           | -2.19754601 | 1.87402001  | -1.28682300 | C                                            | 1.80156435  | 0.20193479  | 1.30059799  |
| H                                           | 3.81660702  | 2.43047601  | 0.82594100  | C                                            | 3.24337485  | -0.21168726 | 1.00952821  |
| H                                           | 4.91947902  | 1.78626401  | -1.28996701 |                                              |             |             |             |
| H                                           | 3.89399502  | 0.07048900  | -2.73767601 | <b>S<sub>CT</sub>-Min (2-BF<sub>3</sub>)</b> |             |             |             |
| H                                           | 1.77673401  | -0.98824000 | -2.08683401 | C                                            | 3.44796283  | 1.62987137  | -1.18379032 |
| H                                           | 1.68753201  | 1.34919501  | 1.48270401  | C                                            | 3.40878394  | 0.24511053  | -1.55171654 |
| H                                           | -1.30317900 | 1.19107301  | 1.81091301  | C                                            | 2.39838867  | -0.56558034 | -1.14478838 |
| H                                           | -1.76931801 | -0.48542600 | 1.75438101  | C                                            | 1.34421960  | -0.01332920 | -0.37036896 |
| H                                           | -3.75221702 | 1.04293501  | 1.64971501  | C                                            | 1.36306073  | 1.39066986  | -0.02150162 |
| H                                           | -3.63816202 | -0.00401500 | 0.25594800  | C                                            | 2.42200670  | 2.19084433  | -0.42178487 |
| H                                           | -4.12931502 | 2.27810401  | -0.53116500 | C                                            | -1.07690290 | 0.83200038  | -1.23701592 |
| H                                           | -2.80328302 | 2.93236601  | 0.39330800  | C                                            | -1.03862811 | -0.13709142 | -0.14130764 |
| H                                           | -0.41254400 | 0.91419800  | -2.00614501 | C                                            | -1.84366800 | 0.15239170  | 1.08976203  |
| O                                           | -2.29110301 | 2.49282901  | -2.35369601 | C                                            | -3.14313201 | 0.85416736  | 0.70193853  |
| N                                           | 0.34625300  | -0.47353800 | 0.10677700  | C                                            | -2.88237144 | 2.12579145  | -0.10647480 |
| C                                           | 0.37802500  | -1.79219501 | 0.51031500  | C                                            | -1.92342443 | 1.89001658  | -1.24547130 |
| O                                           | 1.38282401  | -2.37566801 | 0.77019900  | H                                            | 2.44427295  | 3.23235564  | -0.15307369 |

|   |             |             |             |   |             |             |             |
|---|-------------|-------------|-------------|---|-------------|-------------|-------------|
| H | 4.27559044  | 2.23958278  | -1.51150663 | C | -1.79877618 | 1.94954957  | -1.09346736 |
| H | 4.18938096  | -0.14756447 | -2.18431789 | H | 2.09300423  | 3.31711140  | -0.45001891 |
| H | 2.35896158  | -1.59899590 | -1.43040915 | H | 3.90943217  | 2.39539063  | -1.86645374 |
| H | 0.54715306  | 1.78898793  | 0.55642418  | H | 4.08394674  | -0.04659712 | -2.25706395 |
| H | -1.27501941 | 0.81546435  | 1.74169712  | H | 2.46864209  | -1.59773937 | -1.26677664 |
| H | -2.03876502 | -0.75040622 | 1.64997217  | H | 0.50194407  | 1.75908057  | 0.63064898  |
| H | -3.71192987 | 1.10008861  | 1.59125466  | H | -1.27530401 | 0.64321027  | 1.87824080  |
| H | -3.74784566 | 0.17427910  | 0.10952093  | H | -2.12704451 | -0.85694634 | 1.62642977  |
| H | -3.80499072 | 2.50356928  | -0.51860057 | H | -3.67942783 | 1.09774562  | 1.66694535  |
| H | -2.47798541 | 2.91702075  | 0.51703014  | H | -3.72951013 | 0.27965141  | 0.12375078  |
| H | -0.51390854 | 0.65553649  | -2.12475726 | H | -3.63078741 | 2.65365688  | -0.32448425 |
| O | -1.87871299 | 2.71783165  | -2.24212951 | H | -2.28494971 | 2.89688220  | 0.73988583  |
| N | 0.23935809  | -0.75965884 | 0.01316258  | H | -0.47355705 | 0.66962592  | -2.03425364 |
| C | 0.42076278  | -2.05619794 | 0.48017579  | O | -1.71483965 | 2.81421415  | -2.05541137 |
| O | 1.50245858  | -2.51542407 | 0.68603176  | N | 0.26023329  | -0.78871057 | 0.10000646  |
| O | -0.71233268 | -2.66423303 | 0.68762064  | C | 0.42717756  | -2.10030844 | 0.53937915  |
| C | -0.66228117 | -3.98372999 | 1.22764663  | O | 1.49877333  | -2.56152924 | 0.77851281  |
| H | -1.68832132 | -4.31085495 | 1.27040687  | O | -0.71836408 | -2.69175511 | 0.72390726  |
| H | -0.22951729 | -3.96308833 | 2.21708416  | C | -0.69909657 | -4.02257856 | 1.23908166  |
| H | -0.08415168 | -4.62826735 | 0.58342072  | H | -1.73294007 | -4.32400074 | 1.28129893  |
| B | -2.77627158 | 3.90908085  | -2.45187131 | H | -0.25968495 | -4.03308388 | 2.22559164  |
| F | -4.08992151 | 3.49406681  | -2.59229216 | H | -0.14126992 | -4.66755787 | 0.57741124  |
| F | -2.66317636 | 4.77742792  | -1.37989389 | B | -2.51238325 | 4.08649339  | -2.18019809 |
| F | -2.32915252 | 4.50623064  | -3.60774947 | F | -3.85935101 | 3.79396199  | -2.30830983 |
|   |             |             |             | F | -2.30014631 | 4.87791892  | -1.06423754 |
|   |             |             |             | F | -2.03987173 | 4.70720882  | -3.31279947 |

**S<sub>CT</sub>-TS (2-BF<sub>3</sub>)**

|   |             |             |             |
|---|-------------|-------------|-------------|
| C | 3.17863561  | 1.73843192  | -1.42161961 |
| C | 3.29138312  | 0.32596341  | -1.62791944 |
| C | 2.40382020  | -0.54425931 | -1.08039302 |
| C | 1.32801820  | -0.02765822 | -0.31328594 |
| C | 1.22307024  | 1.39435291  | -0.07158743 |
| C | 2.15965922  | 2.26013618  | -0.63680411 |
| C | -1.00114312 | 0.85762200  | -1.12747202 |
| C | -1.01351782 | -0.16147900 | -0.06549586 |
| C | -1.85807596 | 0.07582275  | 1.15192980  |
| C | -3.10150344 | 0.87817543  | 0.77658324  |
| C | -2.74117244 | 2.18170355  | 0.06153110  |

**CI(S<sub>CT</sub>/S<sub>0</sub>) (2-BF<sub>3</sub>)**

|   |             |            |             |
|---|-------------|------------|-------------|
| C | 1.61878663  | 4.47370386 | 2.25534193  |
| C | 2.64825254  | 3.71808584 | 1.59646256  |
| C | 2.36122301  | 2.47909368 | 1.08914987  |
| C | 1.07038587  | 1.93128877 | 1.29701178  |
| C | -0.00394313 | 2.71608798 | 1.86303494  |
| C | 0.36055029  | 4.01248515 | 2.39828881  |
| C | -0.97604812 | 2.84031809 | 0.23143158  |
| C | -0.74863840 | 1.39834660 | 0.00269832  |
| C | -1.87665324 | 0.47529434 | -0.40149760 |

|                                              |             |             |             |                                             |             |             |             |
|----------------------------------------------|-------------|-------------|-------------|---------------------------------------------|-------------|-------------|-------------|
| C                                            | -3.24278403 | 1.18136201  | -0.37770825 | C                                           | -0.85389976 | 1.23877200  | -0.08721852 |
| C                                            | -3.33733315 | 2.29121518  | 0.67748887  | C                                           | -1.98784539 | 0.32296875  | 0.30275163  |
| C                                            | -2.26882267 | 3.30423587  | 0.38155845  | C                                           | -3.34538114 | 0.99839663  | 0.10807592  |
| H                                            | -0.39020845 | 4.59235613  | 2.90204994  | C                                           | -3.41782167 | 2.35929973  | 0.81058261  |
| H                                            | 1.87306289  | 5.43984849  | 2.65781923  | C                                           | -2.35247945 | 3.27362284  | 0.27575540  |
| H                                            | 3.62977191  | 4.13728995  | 1.49501759  | H                                           | -0.20869180 | 4.69584903  | 2.79203780  |
| H                                            | 3.10216540  | 1.91242222  | 0.56012177  | H                                           | 2.05840841  | 5.52836232  | 2.39378307  |
| H                                            | -0.74651557 | 2.16004437  | 2.40766219  | H                                           | 3.70043368  | 4.14413467  | 1.16404531  |
| H                                            | -1.87256896 | -0.37479799 | 0.27390532  | H                                           | 3.06074638  | 1.94393792  | 0.25409635  |
| H                                            | -1.68371340 | 0.08528986  | -1.39506756 | H                                           | -0.69825775 | 2.32359550  | 2.22898623  |
| H                                            | -4.01678553 | 0.44203191  | -0.20395941 | H                                           | -1.86679055 | 0.03939629  | 1.34876929  |
| H                                            | -3.44152196 | 1.62218786  | -1.34940251 | H                                           | -1.93908672 | -0.59016907 | -0.27509655 |
| H                                            | -4.30984724 | 2.75158050  | 0.66218779  | H                                           | -4.12914126 | 0.35775884  | 0.49477518  |
| H                                            | -3.17671274 | 1.89096768  | 1.67811829  | H                                           | -3.54270417 | 1.13335324  | -0.95237971 |
| H                                            | -0.27389330 | 3.49968944  | -0.24986735 | H                                           | -4.38193916 | 2.82383271  | 0.68120918  |
| O                                            | -2.48381460 | 4.55991907  | 0.31545050  | H                                           | -3.25207802 | 2.25068152  | 1.88121788  |
| N                                            | 0.45901287  | 0.97883833  | 0.46321516  | H                                           | -0.46145196 | 3.34049847  | -0.69578686 |
| C                                            | 1.11485831  | -0.23016136 | 0.13971564  | O                                           | -2.50195085 | 4.50692461  | 0.13215068  |
| O                                            | 2.13446770  | -0.54533610 | 0.65260783  | N                                           | 0.46897763  | 0.96073870  | 0.35878866  |
| O                                            | 0.46746774  | -0.91312259 | -0.76202958 | C                                           | 1.18031580  | -0.16663646 | 0.02227099  |
| C                                            | 1.02090296  | -2.17795382 | -1.13781130 | O                                           | 2.28474748  | -0.39451940 | 0.41401289  |
| H                                            | 0.32336084  | -2.59676951 | -1.84449827 | O                                           | 0.50162415  | -0.95400815 | -0.78266130 |
| H                                            | 1.11316517  | -2.81329249 | -0.26966395 | C                                           | 1.13762562  | -2.16197122 | -1.19079839 |
| H                                            | 1.98818073  | -2.03386086 | -1.59538226 | H                                           | 0.43233205  | -2.65302212 | -1.84217711 |
| B                                            | -3.72845773 | 5.25273712  | 0.87560338  | H                                           | 1.35315675  | -2.78059404 | -0.33207406 |
| F                                            | -4.81944630 | 4.91659532  | 0.10297622  | H                                           | 2.05269377  | -1.94376530 | -1.72165611 |
| F                                            | -3.89868465 | 4.82208631  | 2.17543092  | B                                           | -3.75614128 | 5.34921213  | 0.58298225  |
| F                                            | -3.46134404 | 6.59108864  | 0.81013142  | F                                           | -4.81560618 | 4.94791666  | -0.18499278 |
| <b>T<sub>PP</sub>-Min (2-BF<sub>3</sub>)</b> |             |             |             | F                                           | -3.95031276 | 5.07802045  | 1.91040769  |
| C                                            | 1.76505449  | 4.56622904  | 2.01522449  | F                                           | -3.39181470 | 6.63540798  | 0.34921792  |
| C                                            | 2.70350096  | 3.77221754  | 1.32033268  | <b>T<sub>PP</sub>-TS (2-BF<sub>3</sub>)</b> |             |             |             |
| C                                            | 2.35529374  | 2.52966773  | 0.81045330  | C                                           | 1.77438025  | 4.59576931  | 1.99906266  |
| C                                            | 1.06115760  | 2.04886326  | 1.04609312  | C                                           | 2.76430438  | 3.74076090  | 1.39273485  |
| C                                            | 0.13710284  | 2.82575275  | 1.77601609  | C                                           | 2.40769236  | 2.49185296  | 0.88672749  |
| C                                            | 0.50304322  | 4.10683905  | 2.24004755  | C                                           | 1.10261359  | 2.03982472  | 1.04965333  |
| C                                            | -1.10774610 | 2.71310977  | -0.11102068 | C                                           | 0.09187900  | 2.87244898  | 1.69048860  |

|                                                                         |             |             |             |                                                                        |             |             |             |
|-------------------------------------------------------------------------|-------------|-------------|-------------|------------------------------------------------------------------------|-------------|-------------|-------------|
| C                                                                       | 0.50358741  | 4.20038382  | 2.13823093  | C                                                                      | 1.65077560  | -0.83478041 | 0.41336436  |
| C                                                                       | -1.05259496 | 2.73473210  | -0.02015196 | C                                                                      | 1.95587685  | -0.98457374 | 1.74846839  |
| C                                                                       | -0.83828472 | 1.26527885  | -0.08978708 | C                                                                      | 2.42268584  | 0.12699353  | 2.48488404  |
| C                                                                       | -1.96500816 | 0.32865704  | 0.27701715  | C                                                                      | -0.06947194 | 0.37098671  | -1.06154724 |
| C                                                                       | -3.32807111 | 0.99427089  | 0.09023358  | C                                                                      | -0.26668554 | -1.11230010 | -0.97323130 |
| C                                                                       | -3.41448337 | 2.33940988  | 0.82344179  | C                                                                      | -1.63638163 | -1.55305486 | -0.52098510 |
| C                                                                       | -2.36077511 | 3.27129145  | 0.30645123  | C                                                                      | -1.94352894 | -0.87765643 | 0.82397522  |
| H                                                                       | -0.22928621 | 4.83230028  | 2.60605851  | C                                                                      | -1.91641852 | 0.65409642  | 0.71977584  |
| H                                                                       | 2.07806656  | 5.56487560  | 2.35401994  | C                                                                      | -0.95341498 | 1.21632542  | -0.28615577 |
| H                                                                       | 3.77624613  | 4.08660968  | 1.29719165  | H                                                                      | 2.68852893  | 0.00425036  | 3.51681956  |
| H                                                                       | 3.13049049  | 1.88521954  | 0.38051592  | H                                                                      | 2.83462809  | 2.25040022  | 2.47275399  |
| H                                                                       | -0.60674497 | 2.34972175  | 2.32731525  | H                                                                      | 2.28327032  | 2.56611995  | 0.09934161  |
| H                                                                       | -1.84701171 | 0.02353542  | 1.31697245  | H                                                                      | 2.19966603  | 0.42908228  | -1.23885290 |
| H                                                                       | -1.90941255 | -0.57170612 | -0.32004495 | H                                                                      | 1.83730557  | -1.93908550 | 2.22055336  |
| H                                                                       | -4.10792577 | 0.34136426  | 0.46493033  | H                                                                      | -1.70027843 | -2.62709159 | -0.43497277 |
| H                                                                       | -3.52760485 | 1.14791005  | -0.96726392 | H                                                                      | -2.36517459 | -1.24065003 | -1.26335037 |
| H                                                                       | -4.38671043 | 2.79345218  | 0.72395890  | H                                                                      | -1.22808735 | -1.21415670 | 1.56433556  |
| H                                                                       | -3.22309145 | 2.20164873  | 1.88697771  | H                                                                      | -2.92141765 | -1.17876560 | 1.17933334  |
| H                                                                       | -0.47634380 | 3.35672090  | -0.68663823 | H                                                                      | -2.88350458 | 1.03815572  | 0.41551531  |
| O                                                                       | -2.52337196 | 4.49042803  | 0.16065185  | H                                                                      | -1.70693133 | 1.12448407  | 1.67261016  |
| N                                                                       | 0.49320830  | 0.96902592  | 0.34718212  | H                                                                      | 0.12331131  | 0.77840645  | -2.04142362 |
| C                                                                       | 1.18268921  | -0.16390404 | 0.00310769  | O                                                                      | -0.88465190 | 2.44008593  | -0.49963205 |
| O                                                                       | 2.27901847  | -0.42751853 | 0.39862971  | N                                                                      | 0.88798388  | -1.73434212 | -0.37564795 |
| O                                                                       | 0.48772457  | -0.93393091 | -0.80786475 | C                                                                      | 1.19194175  | -3.05841991 | -0.46381797 |
| C                                                                       | 1.09101710  | -2.16021883 | -1.20438331 | O                                                                      | 2.07470491  | -3.58285754 | 0.14288964  |
| H                                                                       | 0.37555967  | -2.63553762 | -1.85644370 | O                                                                      | 0.37798370  | -3.68891007 | -1.28319723 |
| H                                                                       | 1.28514765  | -2.78007226 | -0.34121130 | C                                                                      | 0.57916478  | -5.08770143 | -1.44673229 |
| H                                                                       | 2.01435157  | -1.97042504 | -1.73133550 | H                                                                      | -0.18056646 | -5.40794217 | -2.13993687 |
| B                                                                       | -3.79607175 | 5.32882489  | 0.59877109  | H                                                                      | 0.46673467  | -5.59595434 | -0.50211189 |
| F                                                                       | -4.83934995 | 4.89482293  | -0.16872036 | H                                                                      | 1.56140676  | -5.27879701 | -1.84842675 |
| F                                                                       | -3.98215242 | 5.06917816  | 1.92764667  | B                                                                      | -1.66485608 | 3.57869321  | 0.24361220  |
| F                                                                       | -3.44363189 | 6.61306447  | 0.34697152  | F                                                                      | -2.99636532 | 3.39445642  | -0.01460687 |
|                                                                         |             |             |             | F                                                                      | -1.38033415 | 3.46236299  | 1.57681930  |
|                                                                         |             |             |             | F                                                                      | -1.17782573 | 4.72248004  | -0.30290768 |
| <b>T<sub>PP</sub>-TS<sup>dis</sup> (2-BF<sub>3</sub> in Figure S7b)</b> |             |             |             |                                                                        |             |             |             |
| C                                                                       | 2.49664887  | 1.41781551  | 1.88533273  |                                                                        |             |             |             |
| C                                                                       | 2.17987547  | 1.60632476  | 0.56558320  |                                                                        |             |             |             |
| C                                                                       | 1.76602683  | 0.46524249  | -0.25277914 |                                                                        |             |             |             |
|                                                                         |             |             |             | <b>S<sub>0</sub>-TS<sup>C-C</sup> (2-BF<sub>3</sub> in Figure S9b)</b> |             |             |             |
| C                                                                       | 1.78952949  | 4.61282055  | 1.91766673  |                                                                        |             |             |             |

|   |             |             |             |
|---|-------------|-------------|-------------|
| C | 2.80967419  | 3.66336494  | 1.48702173  |
| C | 2.44267494  | 2.40861141  | 0.99743998  |
| C | 1.11286183  | 2.01296719  | 1.06528093  |
| C | 0.05813668  | 2.91120960  | 1.61831348  |
| C | 0.50017397  | 4.29217197  | 1.94595874  |
| C | -1.06890961 | 2.71295074  | 0.14820149  |
| C | -0.83928913 | 1.24313841  | -0.06053312 |
| C | -1.95398511 | 0.26943768  | 0.25371532  |
| C | -3.32167624 | 0.91191609  | 0.03296866  |
| C | -3.48209764 | 2.20000439  | 0.84853772  |
| C | -2.42483436 | 3.19070921  | 0.46683416  |
| H | -0.24563683 | 5.00242501  | 2.25478813  |
| H | 2.10448872  | 5.60007435  | 2.20878593  |
| H | 3.84033912  | 3.96291612  | 1.48460633  |
| H | 3.17973037  | 1.75217666  | 0.58247887  |
| H | -0.48959535 | 2.43907334  | 2.43226309  |
| H | -1.86436958 | -0.04744710 | 1.29308739  |
| H | -1.86049591 | -0.61877519 | -0.35524471 |
| H | -4.10580627 | 0.21952327  | 0.31664388  |
| H | -3.46436700 | 1.13297216  | -1.02222195 |
| H | -4.45854163 | 2.64113875  | 0.72839292  |
| H | -3.34354141 | 1.99429058  | 1.90987332  |
| H | -0.59322533 | 3.35105787  | -0.58928474 |
| O | -2.60028618 | 4.40827286  | 0.43494775  |
| N | 0.49465929  | 0.95314369  | 0.35602488  |
| C | 1.18284190  | -0.17475027 | -0.01484915 |
| O | 2.28874267  | -0.43675661 | 0.35346394  |
| O | 0.48754462  | -0.92831430 | -0.84039217 |
| C | 1.09806926  | -2.13493200 | -1.27833522 |
| H | 0.37832226  | -2.60275337 | -1.93142731 |
| H | 1.31473724  | -2.77577711 | -0.43583150 |
| H | 2.01059492  | -1.92105206 | -1.81553732 |
| B | -3.92776343 | 5.21606122  | 0.86110053  |
| F | -4.91186014 | 4.78377406  | 0.02645403  |
| F | -4.15627652 | 4.89487093  | 2.16522213  |
| F | -3.58007075 | 6.50783102  | 0.67230874  |

**STC(T<sub>pp</sub>/S<sub>0</sub>) (2-BF<sub>3</sub>)**

|   |             |             |             |
|---|-------------|-------------|-------------|
| C | 1.72294566  | 4.56365462  | 2.01852571  |
| C | 2.70959261  | 3.76825552  | 1.31227187  |
| C | 2.35832708  | 2.51246739  | 0.81412967  |
| C | 1.08304771  | 2.01876397  | 1.03515582  |
| C | -0.01690154 | 2.85536858  | 1.57730914  |
| C | 0.46285890  | 4.14963011  | 2.16777723  |
| C | -0.97352919 | 2.75096532  | 0.11158082  |
| C | -0.84700226 | 1.25916592  | -0.08660895 |
| C | -1.98117765 | 0.33353872  | 0.29942681  |
| C | -3.34053250 | 1.00199273  | 0.10293025  |
| C | -3.42059069 | 2.36284645  | 0.80699351  |
| C | -2.34363540 | 3.28305085  | 0.31947945  |
| H | -0.22729565 | 4.72064689  | 2.76319239  |
| H | 2.04164338  | 5.51002760  | 2.42486072  |
| H | 3.70286586  | 4.14860847  | 1.16708933  |
| H | 3.06863340  | 1.93123248  | 0.26227087  |
| H | -0.63775098 | 2.30618540  | 2.28616858  |
| H | -1.86341617 | 0.04756815  | 1.34587917  |
| H | -1.93256202 | -0.58212601 | -0.27621426 |
| H | -4.12557657 | 0.36377604  | 0.49394527  |
| H | -3.54270588 | 1.13460156  | -0.95635526 |
| H | -4.38570931 | 2.82434428  | 0.68071966  |
| H | -3.25030197 | 2.24814438  | 1.87766412  |
| H | -0.46992134 | 3.32546135  | -0.66793230 |
| O | -2.49571401 | 4.49036440  | 0.14152214  |
| N | 0.48321823  | 0.94097726  | 0.33467705  |
| C | 1.18216672  | -0.17801665 | 0.01108861  |
| O | 2.28746556  | -0.41287170 | 0.40380748  |
| O | 0.49751134  | -0.96734578 | -0.78974631 |
| C | 1.13633725  | -2.16881630 | -1.19343428 |
| H | 0.43320284  | -2.66133559 | -1.84517073 |
| H | 1.35408881  | -2.78558211 | -0.33378751 |
| H | 2.05167438  | -1.94666235 | -1.72230240 |
| B | -3.77330058 | 5.36073226  | 0.58575355  |
| F | -4.81390808 | 4.94759023  | -0.18848894 |
| F | -3.95047626 | 5.08025045  | 1.90785934  |

|                                             |             |             |             |
|---------------------------------------------|-------------|-------------|-------------|
| F                                           | -3.38849779 | 6.63321946  | 0.34618447  |
| <b>S<sub>0</sub>-Int (2-BF<sub>3</sub>)</b> |             |             |             |
| C                                           | 1.83058899  | 4.59024373  | 2.01384047  |
| C                                           | 2.81224681  | 3.51755688  | 1.88563832  |
| C                                           | 2.44762814  | 2.27597587  | 1.37850452  |
| C                                           | 1.10056190  | 2.03228694  | 1.12456084  |
| C                                           | 0.02266179  | 3.00929229  | 1.52588457  |
| C                                           | 0.53934990  | 4.39280569  | 1.79395894  |
| C                                           | -1.01159730 | 2.81300549  | 0.35862626  |
| C                                           | -0.82667646 | 1.35101262  | 0.03771280  |
| C                                           | -1.92252058 | 0.44618176  | -0.44056885 |
| C                                           | -3.27358072 | 1.17395018  | -0.36594411 |
| C                                           | -3.39149669 | 2.06256058  | 0.88912132  |
| C                                           | -2.41104536 | 3.17486386  | 0.73423542  |
| H                                           | -0.16614131 | 5.19960107  | 1.86498382  |
| H                                           | 2.18199022  | 5.57524266  | 2.26569445  |
| H                                           | 3.84217693  | 3.72094464  | 2.10696846  |
| H                                           | 3.18813306  | 1.53437709  | 1.16821032  |
| H                                           | -0.44097629 | 2.60536517  | 2.43752401  |
| H                                           | -1.96297872 | -0.44704527 | 0.17617374  |
| H                                           | -1.75773217 | 0.10510673  | -1.45594472 |
| H                                           | -4.07916682 | 0.45153713  | -0.34999298 |
| H                                           | -3.42474177 | 1.78565229  | -1.25073303 |
| H                                           | -4.39038456 | 2.42846398  | 1.04087689  |
| H                                           | -3.08826239 | 1.49307078  | 1.76500235  |
| H                                           | -0.72672657 | 3.45308379  | -0.48509271 |
| O                                           | -2.66413644 | 4.37122599  | 0.84143799  |
| N                                           | 0.47633864  | 1.01671051  | 0.40278638  |
| C                                           | 1.13323698  | -0.16454315 | 0.07604959  |
| O                                           | 2.15146076  | -0.50526268 | 0.57889922  |
| O                                           | 0.46961899  | -0.86606377 | -0.80371913 |
| C                                           | 1.02526983  | -2.13163293 | -1.16715152 |
| H                                           | 0.33125163  | -2.55209212 | -1.87470990 |
| H                                           | 1.11211206  | -2.76039926 | -0.29549149 |
| H                                           | 1.99374261  | -1.98928843 | -1.61917093 |
| B                                           | -4.07862427 | 5.00576885  | 1.27869572  |

|   |             |            |            |
|---|-------------|------------|------------|
| F | -4.95898378 | 4.66644073 | 0.29748394 |
| F | -4.38614779 | 4.44706278 | 2.48111545 |
| F | -3.82143535 | 6.32987291 | 1.34562468 |

**S<sub>0</sub>-TS (2-BF<sub>3</sub>)**

|   |             |             |             |
|---|-------------|-------------|-------------|
| C | 0.36314133  | 3.72021148  | -0.00789592 |
| C | 1.78291602  | 3.63298411  | 0.00068803  |
| C | 2.42181279  | 2.43773627  | -0.11399267 |
| C | 1.64842031  | 1.27813199  | -0.22623449 |
| C | 0.19436278  | 1.28374288  | -0.07026153 |
| C | -0.43430521 | 2.61269495  | -0.11635330 |
| C | -0.25147483 | 0.02583385  | -0.77631870 |
| C | 0.81081766  | -0.83629746 | -0.10635128 |
| C | 0.73847065  | -2.32919662 | -0.23928643 |
| C | -0.55399915 | -2.71582292 | -0.97078960 |
| C | -1.79398359 | -1.98206718 | -0.45518990 |
| C | -1.60387530 | -0.49732068 | -0.41236803 |
| H | -1.50547357 | 2.68204185  | -0.15756235 |
| H | -0.11122312 | 4.69111420  | 0.04641903  |
| H | 2.35029032  | 4.53944918  | 0.07823711  |
| H | 3.48840456  | 2.38605715  | -0.13524652 |
| H | 0.16852368  | 0.60486346  | 0.99352692  |
| H | 0.76950770  | -2.78912169 | 0.74402163  |
| H | 1.58486278  | -2.70929762 | -0.79010774 |
| H | -0.71802094 | -3.78148345 | -0.87292396 |
| H | -0.43795163 | -2.51321162 | -2.03113258 |
| H | -2.66729840 | -2.18715480 | -1.06347804 |
| H | -2.05383290 | -2.28065910 | 0.55661674  |
| H | -0.17699853 | 0.02082652  | -1.87601026 |
| O | -2.48231752 | 0.28898950  | -0.07975699 |
| N | 1.98259158  | -0.05976448 | -0.18942291 |
| C | 3.28126805  | -0.48943151 | 0.06991700  |
| O | 4.24291482  | 0.16823887  | -0.16570487 |
| O | 3.30338459  | -1.68475930 | 0.59819234  |
| C | 4.58272326  | -2.24684548 | 0.87864169  |
| H | 4.38151531  | -3.22224726 | 1.29039107  |
| H | 5.10770457  | -1.63266930 | 1.59452675  |

|   |             |             |             |
|---|-------------|-------------|-------------|
| H | 5.16088017  | -2.32881993 | -0.02959700 |
| B | -4.00138795 | -0.07679240 | 0.35322126  |
| F | -4.55401113 | -0.68401487 | -0.73090359 |
| F | -3.88669432 | -0.89974781 | 1.42940620  |
| F | -4.53340560 | 1.13027120  | 0.63719786  |

**trans-P (2-BF<sub>3</sub>)**

|   |             |             |             |
|---|-------------|-------------|-------------|
| C | 0.35923173  | 3.77350586  | -0.03443931 |
| C | 1.74142600  | 3.67717727  | 0.00298954  |
| C | 2.39528771  | 2.43994951  | -0.08366111 |
| C | 1.62108333  | 1.32215052  | -0.22936222 |
| C | 0.21995039  | 1.41966620  | -0.37529565 |
| C | -0.42470337 | 2.62778208  | -0.22775000 |
| C | -0.26251006 | 0.03815913  | -0.75373987 |
| C | 0.75255462  | -0.78413101 | 0.06801580  |
| C | 0.70413848  | -2.30074930 | -0.20214306 |
| C | -0.57713283 | -2.69119201 | -0.96031678 |
| C | -1.81639111 | -1.96421040 | -0.44207431 |
| C | -1.62170690 | -0.47212583 | -0.39833767 |
| H | -1.49571357 | 2.68817426  | -0.26507597 |
| H | -0.11777266 | 4.73306144  | 0.03151437  |
| H | 2.33656076  | 4.56504228  | 0.10602923  |
| H | 3.46330394  | 2.37832636  | -0.04945828 |
| H | 0.43872373  | -0.38514737 | 1.10457820  |
| H | 0.77501916  | -2.84579058 | 0.72990840  |
| H | 1.55149963  | -2.61381887 | -0.79726223 |
| H | -0.73498837 | -3.76195279 | -0.88430511 |
| H | -0.46030054 | -2.48100814 | -2.01986536 |
| H | -2.69274171 | -2.16502712 | -1.04683918 |
| H | -2.06873879 | -2.27129610 | 0.56956892  |
| H | -0.14837769 | -0.07339742 | -1.83785448 |
| O | -2.49827172 | 0.31472543  | -0.06607903 |
| N | 1.99479335  | -0.05268545 | -0.21217640 |
| C | 3.26992213  | -0.46174081 | 0.07109674  |
| O | 4.24022978  | 0.20044588  | -0.14309790 |
| O | 3.31486487  | -1.67147331 | 0.59660771  |
| C | 4.60487637  | -2.20881301 | 0.87124193  |

|   |             |             |             |
|---|-------------|-------------|-------------|
| H | 4.42653941  | -3.19123928 | 1.28019316  |
| H | 5.12445670  | -1.59137661 | 1.58916768  |
| H | 5.18629467  | -2.27931595 | -0.03658219 |
| B | -4.02078929 | -0.03622592 | 0.35700186  |
| F | -4.57352378 | -0.63829945 | -0.73016353 |
| F | -3.92567601 | -0.85898060 | 1.43572554  |
| F | -4.53882527 | 1.17829708  | 0.63635353  |

**cis-P (2-BF<sub>3</sub>)**

|   |             |             |             |
|---|-------------|-------------|-------------|
| C | 2.20793520  | 3.86839069  | 0.01791538  |
| C | 2.54002811  | 2.74573555  | -0.73268642 |
| C | 1.73500133  | 1.60688905  | -0.73011030 |
| C | 0.59199029  | 1.62347263  | 0.03809845  |
| C | 0.23849864  | 2.74560762  | 0.78980668  |
| C | 1.04781826  | 3.87213843  | 0.79604287  |
| C | -1.01787152 | 2.43481299  | 1.57327217  |
| C | -1.55936102 | 1.14190899  | 0.90529637  |
| C | -2.68480034 | 1.48583200  | -0.07075858 |
| C | -3.88919923 | 2.10252050  | 0.65286801  |
| C | -3.47782068 | 3.01125042  | 1.84088793  |
| C | -2.07605602 | 3.49939748  | 1.66989787  |
| H | 0.78644187  | 4.73285735  | 1.37961004  |
| H | 2.84417673  | 4.73444882  | 0.00229529  |
| H | 3.43527668  | 2.74874405  | -1.32830035 |
| H | 1.99926605  | 0.74315694  | -1.30219447 |
| H | -1.89852852 | 0.43083586  | 1.64386792  |
| H | -2.99011609 | 0.60031449  | -0.61103215 |
| H | -2.29310925 | 2.18819250  | -0.80386883 |
| H | -4.53831029 | 1.32434257  | 1.03446734  |
| H | -4.46962406 | 2.68627756  | -0.04995826 |
| H | -4.16704730 | 3.82365319  | 1.98512351  |
| H | -3.45305470 | 2.42414115  | 2.75665375  |
| H | -0.76214215 | 2.22967511  | 2.64226516  |
| O | -1.73323946 | 4.67387671  | 1.65130141  |
| N | -0.37822083 | 0.61199947  | 0.21346368  |
| C | -0.25476446 | -0.67312921 | -0.19831389 |
| O | 0.69127458  | -1.12329587 | -0.77703439 |

|   |             |             |             |   |             |            |            |
|---|-------------|-------------|-------------|---|-------------|------------|------------|
| O | -1.32366958 | -1.38660749 | 0.12248536  | B | -2.69927842 | 5.97456264 | 1.78325023 |
| C | -1.31894525 | -2.76034314 | -0.24766627 | F | -3.58616565 | 5.86650904 | 0.76000415 |
| H | -2.26135387 | -3.15551085 | 0.09648079  | F | -3.27628600 | 5.87321832 | 3.00875883 |
| H | -0.49853781 | -3.27556074 | 0.22851638  | F | -1.83447125 | 7.00259478 | 1.66228160 |
| H | -1.23738521 | -2.86110927 | -1.31934716 |   |             |            |            |
